# Supplementary material for: Chiral ureas and thioureas supported on polystyrene for enantioselective aza-Henry reactions under solvent-free conditions
Source: Royal Society of Chemistry journal article supplement (doi:10.1039/c4gc02474e), 2015-01-01
Supplement: c4gc02474e1.pdf [file c4gc02474e1.pdf]

## Supporting Information

### Chiral Ureas and Thioureas Supported on Polystyrene for Enantioselective Aza-Henry Reaction in Solvent-free conditions.

Rafael Pedrosa,\* José M. Andrés,\* Daisy P. Ávila, Miriam Ceballos and Rodrigo Pindado

*Instituto CINQUIMA and Departamento de Química Orgánica, Facultad de Ciencias,  
Universidad de Valladolid, Paseo de Belén 7, 47011 Valladolid, Spain*  
E-mail: pedrosa@qo.uva.es

### Table of Contents

|                                                                                 |     |
|---------------------------------------------------------------------------------|-----|
| 1. Synthesis of Catalysts and imines .....                                      | S2  |
| 2. NMR Spectra for New Compounds and IR (ATR) of supported organocatalysts..... | S22 |
| 3. NMR Spectra for Aza-Henry reaction products.....                             | S43 |
| 4. HPLC Profiles of the Aza-Henry products.....                                 | S52 |

## 1. Synthesis of Catalysts and imines.

### 2-(*tert*-Butoxycarbonylamino)-*N,N*-dibenzylacetamide (**1**).

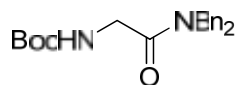

To a cold solution (-15 °C) of Boc-glycine (7.0 g, 40 mmol) and 4-methylmorpholine (4.4 mL, 40 mmol) in dry THF (125 mL), ethyl chloroformate (3.8 mL, 40 mmol) in THF (20 mL) was added dropwise in 15 min. After stirring for another 30 min, dibenzylamine (7.8 mL, 40 mmol) was added. Then the reaction mixture was allowed to warm to room temperature and stirred overnight. After evaporation of the solvent *in vacuo*, the residue was diluted with EtOAc (150 mL) and the organic phase was washed with 10% Na<sub>2</sub>CO<sub>3</sub> (50 mL), 0.1M HCl (2 x 50 mL), brine and dried over anhydrous MgSO<sub>4</sub>. After filtration and evaporation of solvent *in vacuo*, the crude solid was recrystallized from hexane-ethyl acetate to provide N-Boc- $\alpha$ -amino amide **1** (11.3 g, 32 mmol, 80%) as a colorless solid. Mp 84-85 °C. <sup>1</sup>H-NMR (400 MHz, CDCl<sub>3</sub>):  $\delta$  1.44 (s, 9H, CH<sub>3</sub>); 4.07 (d, J = 4.2 Hz, 2H, CH<sub>2</sub>NH); 4.37 (s, 2H, CH<sub>2</sub>Ph); 4.61 (s, 2H, CH<sub>2</sub>Ph); 5.60 (br s, 1H, NH); 7.10-7.40 (m, 10H, Har). <sup>13</sup>C-NMR (101 MHz, CDCl<sub>3</sub>):  $\delta$  28.3 (CH<sub>3</sub>); 42.4 (CH<sub>2</sub>NH); 48.5, 48.9 (CH<sub>2</sub>Ph); 79.6 (C(CH<sub>3</sub>)<sub>3</sub>); 126.4, 127.6, 127.9, 128.3, 128.7, 129.1 (CHar); 135.3, 136.5 (Car); 155.7 (CO<sub>2</sub>tBu), 169.0 (CON). IR (ATR): 3411, 2986, 1702, 1649, 1506, 1448, 1161, 949, 752, 705 cm<sup>-1</sup>. HRMS calcd. for C<sub>21</sub>H<sub>26</sub>N<sub>2</sub>O<sub>3</sub> + Na: 377.1835; found: 377.1823.

### 2-(*tert*-Butoxycarbonylamino)-*N*-benzyl-*N*-methylacetamide (**2**).<sup>1</sup>

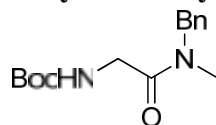

This compound was obtained from Boc-glycine (7g, 40 mmol) and *N*-benzylmethylamine (5.5 mL, 40 mmol) as described for **1** and used for the subsequent step without further purification: 9.9 g (35.6 mmol, 89% yield). Colorless solid, mp 58-59 °C (n-Hexane). <sup>1</sup>H-NMR (400 MHz, CDCl<sub>3</sub>):  $\delta$  1.42 (s, 3.6H, C(CH<sub>3</sub>)); 1.44 (s, 5.4H, C(CH<sub>3</sub>)); 2.85 (s, 1.8H, CH<sub>3</sub>N); 2.86 (s, 1.2H, CH<sub>3</sub>N); 3.99 (d, J = 4.3 Hz, 1.2H, CH<sub>2</sub>NHBoc); 4.01 (d, J = 4.2 Hz, 0.8H, CH<sub>2</sub>NHBoc); 4.44 (s, 0.8H, CH<sub>2</sub>Ph); 4.58 (s, 1.2H, CH<sub>2</sub>Ph); 5.55 (br s, 0.4H, NH); 5.58 (br s, 0.6H, NH); 7.10-7.35 (m, 5H, Har). <sup>13</sup>C-NMR (101 MHz, CDCl<sub>3</sub>):  $\delta$  28.3 (C(CH<sub>3</sub>)); 33.4, 34.0 (CH<sub>3</sub>N); 42.2, 42.4 (CH<sub>2</sub>N);

51.1, 52.1 ( $\underline{\text{CH}_2\text{Ph}}$ ); 79.5 ( $\underline{\text{C}}(\text{CH}_3)_3$ ); 126.3, 127.5, 127.9, 128.6, 129.0 ( $\underline{\text{C}}\text{Har}$ ); 135.5, 136.5 ( $\underline{\text{C}}\text{ar}$ ); 155.6, 155.7 ( $\underline{\text{C}}\text{O}_2\text{tBu}$ ); 168.4, 168.6 ( $\underline{\text{C}}\text{ON}$ ). **IR** (ATR): 3339, 2972, 2925, 1695, 1649, 1478, 1452, 1365, 1147, 1049, 1018, 868, 745, 698  $\text{cm}^{-1}$ . **HRMS** calcd. for  $\text{C}_{15}\text{H}_{22}\text{N}_2\text{O}_3 + \text{Na}$ : 301.1523; found: 301.1521.

**6-(*tert*-Butoxycarbonylamino)-*N,N*-dibenzylhexanamide (3).**

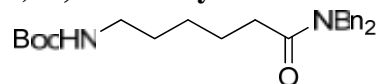

This compound was obtained from Boc-6-aminohexanoic acid (6.0 g, 26 mmol) by reaction with dibenzylamine (5 mL, 26 mmol) as described for **1** and purified by flash column chromatography on silica gel (eluent, hexane/EtOAc: 4/1 to 2/1). Yield: 8.0 g (19.5 mmol, 75%). Colorless oil.  **$^1\text{H-NMR}$**  (400 MHz,  $\text{CDCl}_3$ )  $\delta$  1.34 (m, 2H,  $\underline{\text{CH}_2}$ ); 1.42 (s, 9H, ( $\underline{\text{CH}_3}$ )<sub>3</sub>C); 1.47 (m, 2H,  $\underline{\text{CH}_2}$ ); 1.71 (m, 2H,  $\underline{\text{CH}_2}$ ); 2.40 (t, 2H,  $J = 7.4$  Hz,  $\underline{\text{CH}_2\text{CON}}$ ); 3.08 (d, 2H,  $J = 6.3$  Hz,  $\underline{\text{CH}_2\text{NH}}$ ); 4.43 (s, 2H,  $\underline{\text{CH}_2\text{Ph}}$ ); 4.59 (s, 2H  $\underline{\text{CH}_2\text{Ph}}$ ); 4.63 (br s, 1H  $\underline{\text{NH}}$ ); 7.10-7.40 (m, 10H,  $\underline{\text{Har}}$ ).  **$^{13}\text{C-NMR}$**  (101 MHz,  $\text{CDCl}_3$ )  $\delta$  24.8 ( $\underline{\text{CH}_2}$ ); 26.4 ( $\underline{\text{CH}_2}$ ); 28.3 ( $\underline{\text{CCH}_3}$ )<sub>3</sub>; 29.8 ( $\underline{\text{CH}_2}$ ); 32.9 ( $\underline{\text{CH}_2\text{CON}}$ ); 40.3 ( $\underline{\text{CH}_2\text{NH}}$ ); 49.8, 48.1 ( $\underline{\text{CH}_2\text{Ph}}$ ); 78.8 ( $\underline{\text{CCH}_3}$ )<sub>3</sub>; 126.2, 127.2, 127.5, 128.2, 128.5, 128.8 ( $\underline{\text{C}}\text{Har}$ ); 136.5, 137.4 ( $\underline{\text{C}}\text{ar}$ ); 155.9 ( $\underline{\text{C}}\text{O}_2\text{tBu}$ ); 173.3 ( $\underline{\text{C}}\text{ON}$ ). **IR** (ATR): 3344, 2977, 2930, 1700, 1638, 1364, 1246, 1168, 729, 698  $\text{cm}^{-1}$ . **HRMS** calcd. for  $\text{C}_{25}\text{H}_{34}\text{N}_2\text{O}_3 + \text{H}$ : 411.2642; found: 411.2644.

**$\text{N}^1, \text{N}^1$ -Dibenzyl- $\text{N}^2$ -methylethane-1,2-diamine (4).<sup>2</sup>**

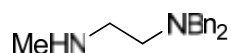

A solution of amide **1** (10.4 g, 29.5 mmol) in anhydrous THF (90 mL) was added dropwise to a suspension of  $\text{LiAlH}_4$  (3.5 g, 89 mmol, 3 equiv) in 120 mL of the same solvent, and refluxed under nitrogen atmosphere for 12 h. The suspension was cooled to 0 °C and sequentially treated with  $\text{H}_2\text{O}$  (3.5 mL), 15%  $\text{NaOH}$  solution (3.5 mL) and  $\text{H}_2\text{O}$  (10.5 mL), and stirred for 2h. The white solids were removed by filtration, the solvent of the filtrate was evaporated on the rotavapor and the residue was purified by flash column chromatography on silica gel ( $\text{CH}_2\text{Cl}_2/\text{MeOH}$ : 4/1). Yield: 7.1 g (28.0 mmol, 95%). Colorless oil.  **$^1\text{H-NMR}$**  (400 MHz,  $\text{CDCl}_3$ ):  $\delta$  1.50 (br s, 1H,  $\underline{\text{NH}}$ ); 2.26 (s, 3H,  $\underline{\text{CH}_3}$ ); 2.62 (m, 4H,  $\underline{\text{CH}_2}$ ); 3.59 (s, 4H,  $\underline{\text{CH}_2\text{Ph}}$ ); 7.20-7.40 (m, 10H,  $\underline{\text{Har}}$ ).  **$^{13}\text{C-NMR}$**  (101 MHz,  $\text{CDCl}_3$ ):  $\delta$  36.2 ( $\underline{\text{CH}_3}$ ); 49.4 ( $\underline{\text{CH}_2\text{NH}}$ ); 53.1 ( $\underline{\text{CH}_2}$ ); 58.7 ( $\underline{\text{CH}_2\text{Ph}}$ ); 126.9,

128.2, 128.8 (CHar); 139.5 (Car). **IR** (ATR): 3305, 3022, 2784, 1500, 1448, 1370, 735, 695  $\text{cm}^{-1}$ . **HRMS** calcd. for  $\text{C}_{17}\text{H}_{22}\text{N}_2 + \text{H}$ : 225.1856; found: 255.1858.

**$\text{N}^1$ -Benzyl- $\text{N}^1, \text{N}^2$ -dimethylethane-1,2-diamine (5).**<sup>3</sup>

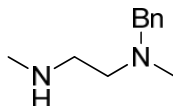

Obtained by reduction of **2** (9.6 g, 34.5 mmol) with LAH (4.14 g, 103.5 mmol) by the procedure described for the preparation of **4** and used for the subsequent step without further purification. Yield: 5.8 g (32.4 mmol, 94%). Colorless oil.  **$^1\text{H-NMR}$**  (400 MHz,  $\text{CDCl}_3$ ):  $\delta$  2.14 (s, 3H, CH<sub>3</sub>); 2.36 (s, 3H, CH<sub>3</sub>); 2.48 (t, 2H,  $J = 6.0$  Hz, CH<sub>2</sub>); 2.62 (t, 2H,  $J = 6.0$  Hz, CH<sub>2</sub>); 3.45 (s, 2H, CH<sub>2</sub>Ph); 7.19-7.26 (m, 5H, Har).  **$^{13}\text{C-NMR}$**  (101 MHz,  $\text{CDCl}_3$ ):  $\delta$  34.3, 42.0 (CH<sub>3</sub>); 47.6, 54.1 (CH<sub>2</sub>N); 62.5 (CH<sub>2</sub>Ph); 127.1, 128.2, 129.0 (CHar); 138.4 (Car). **IR** (ATR): 3380, 2946, 2780, 1664, 1452, 1364, 1127, 1029, 739, 693  $\text{cm}^{-1}$ . **HRMS** calcd. for  $\text{C}_{11}\text{H}_{18}\text{N}_2 + \text{Na}$ : 201.1362; found: 201.1363.

**$\text{N}^1, \text{N}^1$ -Dibenzyl- $\text{N}^6$ -methylhexane-1,6-diamine (6).**

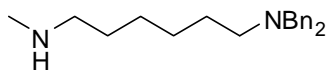

This compound was obtained from N-Boc-amide **3** (8.0 g, 19.5 mmol) by reduction with LAH in THF at reflux for 5h as described for **4** and purified by flash chromatography (EtOAc/MeOH: 4/1): 4.8 g (15.4 mmol, 79% yield). Colorless oil.  **$^1\text{H-NMR}$**  (400 MHz,  $\text{CDCl}_3$ )  $\delta$  1.17 (br s, 1H, NH); 1.28 (m, 4H, CH<sub>2</sub>); 1.45 (m, 2H, CH<sub>2</sub>); 1.54 (m, 2H, CH<sub>2</sub>); 2.43 (m, 2H of CH<sub>2</sub>NBn<sub>2</sub> and 3H of CH<sub>3</sub>); 2.53 (m, 2H, CH<sub>2</sub>NH); 3.57 (s, 4H CH<sub>2</sub>Ph); 7.20-7.40 (m, 10H, Har).  **$^{13}\text{C-NMR}$**  (101 MHz,  $\text{CDCl}_3$ )  $\delta$  26.9 (CH<sub>2</sub>); 27.1 (CH<sub>2</sub>); 29.8 (CH<sub>2</sub>); 36.5 (CH<sub>3</sub>); 52.1 (CH<sub>2</sub>N); 53.2 (CH<sub>2</sub>N); 58.3 (CH<sub>2</sub>Ph); 126.6, 128.0, 128.7 (CHar); 140.0 (Car). **IR** (ATR): 3028, 2930, 2853, 2791, 1494, 1452, 1365, 1065, 734, 698  $\text{cm}^{-1}$ . **HRMS** calcd. for  $\text{C}_{21}\text{H}_{30}\text{N}_2 + \text{H}$ : 311.2482; found: 311.2479.

**(S)-Boc-N-(2-(dibenzylamino)ethyl)-N-methylvalinamide (7).**

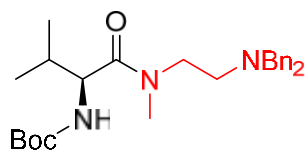

Boc-L-valine (3.30 g, 15.2 mmol, 1.2 equiv) and *N,N'*-dicyclohexylcarbodiimide (DCC) (3.14 g, 15.2 mmol, 1.2 equiv) were dissolved in dichloromethane (40 mL) and cooled down to 0 °C. After the solution was stirred for 30 min, a solution of diamine **4** (3.25 g, 12.7 mmol) in dichloromethane (40 mL) was added dropwise over 15 min. After the addition was complete, the mixture was warmed to room temperature and stirred for another 10 h. After filtration and removal of solvent at reduced pressure, the residue was purified through flash column chromatography on silica gel (eluent, hexane/ethyl acetate: 4/1) to provide 4.67 g of amide **7** (10.3 mmol, 81%) as a colorless oil.  $[\alpha]_D^{23} = -12.7$  (c = 1.1, MeOH). **<sup>1</sup>H-NMR** (400 MHz, CDCl<sub>3</sub>): δ 0.75 (d, J = 6.8 Hz, 0.9H, CH<sub>3</sub>); 0.78 (d, J = 6.8 Hz, 0.9H, CH<sub>3</sub>); 0.83 (d, J = 6.8 Hz, 2.1H, CH<sub>3</sub>); 0.92 (d, J = 6.8 Hz, 2.1H, CH<sub>3</sub>); 1.40 (s, 2.7H, C(CH<sub>3</sub>)<sub>3</sub>); 1.42 (s, 6.3H, C(CH<sub>3</sub>)<sub>3</sub>); 1.85 (m, 1H, CH(CH<sub>3</sub>)<sub>2</sub>); 2.56 (m, 2H, CH<sub>2</sub>N); 2.75 (s, 0.9H, CH<sub>3</sub>N); 2.84 (s, 2.1H, CH<sub>3</sub>N); 3.49 (m, 3H, CHHN and CHHPh); 3.63 (m, 3H, CHHN and CHHPh); 4.27 (dd, J = 9.2 Hz, J = 6.4 Hz, 0.3H, CHN); 4.39 (dd, J = 9.2 Hz, J = 5.5 Hz, 0.7H, CHN); 5.15 (d, J = 8.9 Hz, 0.3H, NH); 5.30 (d, J = 9.0 Hz, 0.7H, NH); 7.20-7.38 (m, 10H, Har). **<sup>13</sup>C-NMR** (101 MHz, CDCl<sub>3</sub>): δ 14.2, 17.1, 19.6, 21.0 (CH<sub>3</sub>); 28.3 (C(CH<sub>3</sub>)<sub>3</sub>); 31.3, 31.7 (CH(CH<sub>3</sub>)<sub>2</sub>); 34.0, 35.4 (CH<sub>3</sub>N); 45.5; 48.3; 50.7; 52.1 (CH<sub>2</sub>); 54.9 (CHN); 58.5 (CH<sub>2</sub>Ph); 79.2 (C(CH<sub>3</sub>)<sub>3</sub>); 126.9, 127.1, 128.2, 128.3, 128.8, 128.9 (CHar); 139, 139.3 (Car); 155.6, 155.9 (CO<sub>2</sub>tBu); 171.1, 171.9 (CON). **IR** (ATR): 3426, 3292, 2971, 1716, 1638, 1493, 1369, 1251, 1168, 750, 698 cm<sup>-1</sup>. **HRMS** calcd. for C<sub>27</sub>H<sub>39</sub>N<sub>3</sub>O<sub>3</sub> + H: 454.3064; found: 454.3059.

**(S)-Boc-N-(2-(benzyl(methyl)amino)ethyl)-N-methylvalinamide (8).**

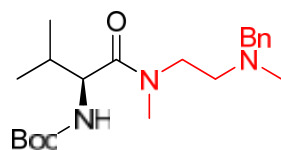

Obtained by reaction of **5** (5.35 g, 30 mmol) with Boc-L-valine in the presence of DCC by the procedure described for the preparation of **7** and purified by flash column chromatography on silica gel (hexane/EtOAc: 2/1). Yield: 8.50 g (22.5 mmol, 75%). Colorless oil.  $[\alpha]_D^{23} = +4.0$  (c = 1.1, CHCl<sub>3</sub>). **<sup>1</sup>H-NMR** (400 MHz, CDCl<sub>3</sub>): δ 0.88 (d, J = 6.8 Hz, 2.1H, CH<sub>3</sub>); 0.89 (d, J = 6.8 Hz, 0.9H, CH<sub>3</sub>); 0.90 (d, J = 6.8 Hz, 0.9H, CH<sub>3</sub>); 0.96 (d, J = 6.8 Hz, 2.1H, CH<sub>3</sub>); 1.42 (s, 2.7H, C(CH<sub>3</sub>)<sub>3</sub>); 1.43 (s, 6.3H, C(CH<sub>3</sub>)<sub>3</sub>); 1.93 (m, 1H, CH(CH<sub>3</sub>)<sub>2</sub>); 2.23 (s, 2.1H, CH<sub>3</sub>N); 2.29 (s, 0.9H, CH<sub>3</sub>N); 2.56 (m, 2H, CH<sub>2</sub>N); 2.87 (s, 0.9H, CH<sub>3</sub>NCO); 3.05 (s, 2.1H, CH<sub>3</sub>NCO); 3.33 (dt, J = 13.5 Hz, J = 6.3 Hz,

1H, CHHN); 3.51 (s, 1.4H, CH<sub>2</sub>Ph); 3.53 (s, 0.6H, CH<sub>2</sub>Ph); 3.73 (dt, J = 13.5 Hz, J = 6.7 Hz, 1H, CHHN); 4.41 (dd, J = 9.2 Hz, J = 7.4 Hz, 0.3H, CHN); 4.44 (dd, J = 9.2 Hz, J = 5.7 Hz, 0.7H, CHN); 5.23 (d, J = 9.3 Hz, 0.3H, NH); 5.29 (d, J = 8.7 Hz, 0.7H, NH); 7.22-7.32 (m, 5H, Har). <sup>13</sup>C-NMR (101 MHz, CDCl<sub>3</sub>): δ 17.1, 17.3 (CH<sub>3</sub>); 19.5, 19.6 (CH<sub>3</sub>); 28.2 (C(CH<sub>3</sub>)<sub>3</sub>); 31.2, 31.8 (CH(CH<sub>3</sub>)<sub>2</sub>); 33.9, 35.8 (CH<sub>3</sub>N); 42.1, 42.6 (CH<sub>3</sub>NCO); 45.6; 47.9 (CH<sub>2</sub>); 54.3, 55.2 (CH<sub>2</sub>); 54.8, 54.9 (CHN); 62.4, 62.7 (CH<sub>2</sub>Ph); 79.1, 79.2 (C(CH<sub>3</sub>)<sub>3</sub>); 126.9, 127.0 128.1, 128.2, 128.8 (CHar); 138.5, 138.6 (Car); 155.5, 155.8 (CO<sub>2</sub>tBu); 171.8, 172.2 (CON). IR (ATR): 3426, 3297, 2966, 2796, 1706, 1633, 1489, 1365, 1240, 1168, 1018, 734, 698 cm<sup>-1</sup>. HRMS calcd. for C<sub>21</sub>H<sub>35</sub>N<sub>3</sub>O<sub>3</sub> + H: 378.2751; found: 378.2741.

**(S)-Boc-N-(6-(dibenzylamino)hexyl)-N-methylvalinamide (9).**

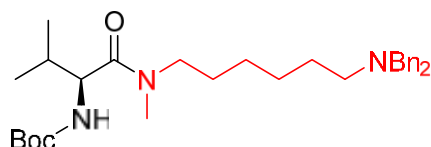

Obtained by reaction of **6** (2.03 g, 6.5 mmol) with Boc-L-valine in the presence of DCC by the procedure described for the preparation of **7** and purified by flash column chromatography on silica gel (hexane/EtOAc: 4/1). Yield: 2.47 g (4.85 mmol, 74%). Colorless oil.  $[\alpha]_D^{23} = +10.4$  (c = 1.1, CHCl<sub>3</sub>). <sup>1</sup>H-NMR (400 MHz, CDCl<sub>3</sub>) δ 0.88 (d, J = 6.8 Hz, 1.8H, CH<sub>3</sub>); 0.89 (d, J = 6.8 Hz, 1.2H, CH<sub>3</sub>); 0.92 (d, J = 6.8 Hz, 1.2H, CH<sub>3</sub>); 0.95 (d, J = 6.8 Hz, 1.8H, CH<sub>3</sub>); 1.17 (m, 2H, CH<sub>2</sub>); 1.26 (m, 2H, CH<sub>2</sub>); 1.41 (s, 3.6H, C(CH<sub>3</sub>)<sub>3</sub>); 1.42 (s, 5.4H, C(CH<sub>3</sub>)<sub>3</sub>); 1.48 (m, 4H, CH<sub>2</sub>); 1.91 (m, 1H, (CH<sub>3</sub>)<sub>2</sub>CH); 2.38 (m, 2H, CH<sub>2</sub>NBn<sub>2</sub>); 2.89 (s, 1.2H, CH<sub>3</sub>N); 3.02 (s, 1.8H, CH<sub>3</sub>N); 3.17 (m, 1H, CHHNMe); 3.47 (m, 1H, CHHNMe); 3.53 (s, 4H, CH<sub>2</sub>Ph); 4.41 (m, 1H, CHN); 5.25 (d, J = 9.4 Hz, 0.4H, NH); 5.29 (d, J = 9.4 Hz, 0.6H, NH); 7.19-7.36 (m, 10H, Har). <sup>13</sup>C-NMR (101 MHz, CDCl<sub>3</sub>) δ 17.1, 17.3 (CH<sub>3</sub>); 19.5; 19.6 (CH<sub>3</sub>); 26.6 (CH<sub>2</sub>); 26.8 (CH<sub>2</sub>); 26.9 (CH<sub>2</sub>); 27.0 (CH<sub>2</sub>); 28.3 (CH<sub>3</sub>)<sub>3</sub>C); 31.3, 31.9 (CH(CH<sub>3</sub>)<sub>2</sub>); 33.4, 33.5 (CH<sub>3</sub>N); 47.9, 49.9 (CH<sub>2</sub>); 53.1 (CH<sub>2</sub>); 54.8, 55.0 (CHN); 58.2 (CH<sub>2</sub>Ph); 79.2 ((CH<sub>3</sub>)<sub>3</sub>C); 126.6, 128.0, 128.7 (CHar); 139.9 (Car); 155.6, 155.9 (CO<sub>2</sub>tBu); 127.7, 172.0 (CON). IR (ATR): 3421, 3302, 2935, 1711, 1638, 1494, 1452, 1365, 1168, 734, 698 cm<sup>-1</sup>. HRMS calcd. for C<sub>31</sub>H<sub>47</sub>N<sub>3</sub>O<sub>3</sub> + H: 510.3690; found: 510.3683.

**(S)-Boc-N-methyl-N-(6-methylamino)hexylvalinamide (10).**

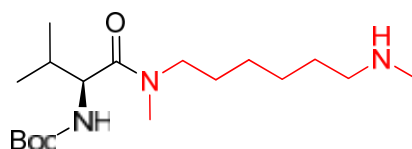

To a solution of Boc-L-valine (1.74g, 8.0 mmol) and 4-methylmorpholine (0.88 mL, 8.0 mmol) in anhydrous dichloromethane (80 mL) was dropped ethyl chloroformate (0.84 mL, 4.4 mmol) at -5 °C. After 20 minutes of stirring, the reaction mixture was washed successively with a cold solution of citric acid (5% aqueous, 40 mL), a solution of sodium bicarbonate (10%, 40 mL) and water (40 mL). The organic layer was dried over MgSO<sub>4</sub>, filtered and diluted with dichloromethane to a volume of 150 mL. This solution was added dropwise (30-60 minutes) to a vigorously stirred solution of *N,N'*-dimethyl-1,6-hexanediamine (7.2 mL, 40 mmol, 5 equiv) in dichloromethane (150 mL) previously cooled to -78 °C. When the addition was complete, the mixture was stirred for 10 minutes at that temperature and then warmed to room temperature and stirred overnight. The reaction mixture was concentrated in vacuo to a volume of about 100 mL, and washed with water (6 ×40 mL). The organic phase was dried over MgSO<sub>4</sub>, filtered, and the solvent was evaporated in vacuo. The crude product was purified by silica gel column chromatography (eluent dichloromethane/methanol: 3/2). The pure compound was obtained as a colorless oil (2.37 g, 6.9 mmol, 86% yield).  $[\alpha]_D^{23} = +11.1$  (c = 1, CHCl<sub>3</sub>). **<sup>1</sup>H-NMR** (400 MHz, CDCl<sub>3</sub>) δ 0.88 (d, J = 6.4 Hz, 1.8H, CH<sub>3</sub>); 0.89 (d, J = 6.4 Hz, 1.2H, CH<sub>3</sub>); 0.93 (d, J = 6.8 Hz, 1.2H, CH<sub>3</sub>); 0.95 (d, J = 6.8 Hz, 1.8H, CH<sub>3</sub>); 1.32 (m, 4H, CH<sub>2</sub>); 1.41 (s, 9H, (CH<sub>3</sub>)<sub>3</sub>C); 1.48 (m, 4H, CH<sub>2</sub>); 1.79 (br s, 1H, NH); 1.92 (m, 1H, (CH<sub>3</sub>)<sub>2</sub>CH); 3.23 (m 2.41 (s, 3H, CH<sub>3</sub>N); 2.55 (m, 2H, CH<sub>2</sub>NH); 2.91 (s, 1.2H, CH<sub>3</sub>NCO); 3.05 ((s, 1.8H, CH<sub>3</sub>NCO); 3.23 (m, 1H, CHHNMe); 3.48 (m, 1H, CHHNMe); 4.41 (m, 1H, CHN); 5.27 (d, J = 9.5 Hz, 0.4H, NHBoc); 5.31 (d, J = 9.2 Hz, 0.6H, NHBoc). **<sup>13</sup>C-NMR** (101 MHz, CDCl<sub>3</sub>) δ 17.1 and 17.3 (CH<sub>3</sub>); 19.4 and 19.5 (CH<sub>3</sub>); 26.5 (CH<sub>2</sub>); 26.9 (CH<sub>2</sub>); 28.2 ((CH<sub>3</sub>)<sub>3</sub>C); 28.4 (CH<sub>2</sub>); 29.4 (CH<sub>2</sub>); 31.2 and 31.8 ((CH<sub>3</sub>)<sub>2</sub>CH); 33.3 (CH<sub>3</sub>N); 35.2 and 36.3 (CH<sub>3</sub>N); 47.7 and 49.7 (CH<sub>2</sub>N); 51.8 (CH<sub>2</sub>NH); 54.7 and 54.9 (CHN); 78.9 (CH<sub>3</sub>)<sub>3</sub>C); 155.5 and 155.8 (CO<sub>2</sub><sup>t</sup>Bu); 171.7 and 171.9 (CON). **IR** (ATR): 3434, 3325, 2972, 2936, 1701, 1638, 1488, 1363, 1166, 917, 642 cm<sup>-1</sup>. **HRMS** calcd. for C<sub>18</sub>H<sub>37</sub>N<sub>3</sub>O<sub>3</sub> + H: 344.2907; found: 344.2908.

**(S)-tert-Butyl (1-((2-aminoethyl)(methyl)amino)-3-methylbutan-2-yl)carbamate (11).**

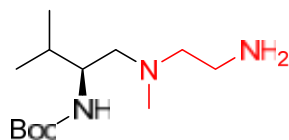

A solution of amino amide **7** (3.63 g, 8.0 mmol) in anhydrous THF (20 mL) was added dropwise to a suspension of LiAlH<sub>4</sub> (0.30 g, 16 mmol, 2 equiv) in 30 mL of the same solvent at 0 °C, and the mixture was stirred at under nitrogen atmosphere for 1 h. Then, the suspension was sequentially treated at 0 °C with water (0.3 mL), 15% NaOH solution (0.3 mL) and water (0.9 mL), and stirred for 2h. The white solids were removed by filtration, the solvent of the filtrate was evaporated on the rotavapor and the residue was purified by flash column chromatography on silica gel (hexane/EtOAc: 4/1) to yield (S)-Boc-N<sup>1</sup>-(2-(dibenzylamino)ethyl)-N<sup>1</sup>,3-dimethylbutane-1,2-diamine as a colorless oil: 2.63 g (6.0 mmol, 75 %).  $[\alpha]_D^{23} = +1.5$  (c = 0.9, CHCl<sub>3</sub>). <sup>1</sup>H-NMR (400 MHz, CDCl<sub>3</sub>): δ 0.79 (d, 3H, J = 6.9 Hz, CH<sub>3</sub>); 0.86 (d, 3H, J = 6.9 Hz, CH<sub>3</sub>); 1.43 (s, 9H, C(CH<sub>3</sub>)<sub>3</sub>); 1.89 (m, 1H, CH(CH<sub>3</sub>)<sub>2</sub>); 2.13 (s, 3H, CH<sub>3</sub>N); 2.22 (m, 2H, CH<sub>2</sub>N); 2.54 (m, 4H, CH<sub>2</sub>N); 3.52 (m, 1H, CHN); 3.60 (s, 4H, CH<sub>2</sub>Ph); 4.56 (brs, 1H, NH); 7.20-7.40 (m, 10H, H<sub>ar</sub>). <sup>13</sup>C-NMR (101 MHz, CDCl<sub>3</sub>): δ 14.2, 17.2, (CH<sub>3</sub>); 18.8, 21.0 (CH<sub>3</sub>); 28.4 (C(CH<sub>3</sub>)<sub>3</sub>); 29.7 (CH(CH<sub>3</sub>)<sub>2</sub>); 42.6 (CH<sub>3</sub>N); 51.2, 56.0 (CH<sub>2</sub>N); 58.7 (CH<sub>2</sub>Ph); 60.3 (CHN); 78.8 (C(CH<sub>3</sub>)<sub>3</sub>); 126.8, 128.1, 128.8 (CH<sub>ar</sub>); 139.7 (C<sub>ar</sub>); 156.1 (CO<sub>2</sub>tBu). IR (ATR): 3370, 2978, 2790, 1710, 1493, 1457, 1364, 1245, 1168, 740, 693 cm<sup>-1</sup>. HRMS calcd. for C<sub>27</sub>H<sub>41</sub>N<sub>3</sub>O<sub>2</sub> + H: 440.3271; found: 440.3255.

To a solution of this compound (2.12 g, 4.8 mmol) in MeOH (50 mL), was added Pd(OH)<sub>2</sub>C (0.7 g) in one portion. The mixture was stirred under H<sub>2</sub> for 24 h and the catalyst was removed by filtration and washed with methanol. The solvent was evaporated under reduced pressure and the residue was purified by flash column chromatography on silica gel (EtOAc/MeOH, 4:1) to give **11** (1.2 g, 4.6 mmol, 96%) as a colorless oil.  $[\alpha]_D^{23} = +14.6$  (c = 1, CHCl<sub>3</sub>). <sup>1</sup>H-NMR (400 MHz, CDCl<sub>3</sub>, 330K): δ 0.92 (d, 3H, J = 6.8 Hz, CH<sub>3</sub>); 0.94 (d, 3H, J = 6.8 Hz, CH<sub>3</sub>); 1.46 (s, 9H, C(CH<sub>3</sub>)); 1.77 (m, 1H, CHCH<sub>3</sub>); 2.43 (s, 3H, CH<sub>3</sub>N); 2.58 (m, 1H); 2.74 (m, 1H); 2.94 (m, 1H, CHHN); 3.02 (m, 1H, CHHN); 3.24 (m, 2H, CH<sub>2</sub>NH<sub>2</sub>); 3.55 (m, 1H, CHN); 6.77 (br s, 3H, NH and NH<sub>2</sub>). <sup>13</sup>C-NMR (101 MHz, CDCl<sub>3</sub>, 330K): δ 17.9 (CH<sub>3</sub>); 19.3 (CH<sub>3</sub>); 28.4 (C(CH<sub>3</sub>)<sub>3</sub>); 31.0 (CH(CH<sub>3</sub>)<sub>2</sub>); 37.0 (CH<sub>2</sub>NH<sub>2</sub>); 41.7 (CH<sub>3</sub>N); 54.1 (CHN); 55.0 (CH<sub>2</sub>); 59.3 (CH<sub>2</sub>); 79.4 (C(CH<sub>3</sub>)<sub>3</sub>); 156.8 (CO<sub>2</sub>tBu). IR: 3250, 2961, 1685, 1524, 1462, 1395, 1240, 1168, 1013 cm<sup>-1</sup>. HRMS calcd. for C<sub>13</sub>H<sub>29</sub>N<sub>3</sub>O<sub>2</sub> + H: 260.2332; found: 260.2336.



**(S)-tert-Butyl 3-methyl-1-(methyl(2-(methylamino)ethyl)amino)butan-2-yl carbamate (12).**

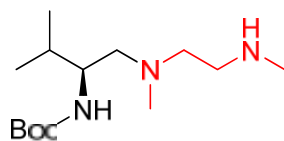

Boc-amide **8** (6.2 g, 16.4 mmol) was reduced by reaction with LAH (1.24 g, 32.8 mmol) in THF at 0 °C for 1h as described for **11** and purified by flash chromatography (EtOAc) to yield (S)-Boc-N<sup>1</sup>-(2-(benzyl(methyl)amino)ethyl)-N<sup>1</sup>,3-dimethylbutane-1,2-diamine as a colorless oil: 4.1 g (11.2 mmol, 68% yield).  $[\alpha]_D^{23} = +8.7$  (c = 1.3, CHCl<sub>3</sub>). <sup>1</sup>H-NMR (400 MHz, CDCl<sub>3</sub>): δ 0.84 (d, 3H, J = 6.9 Hz, CH<sub>3</sub>); 0.88 (d, 3H, J = 6.9 Hz, CH<sub>3</sub>); 1.42 (s, 9H, C(CH<sub>3</sub>)<sub>3</sub>); 1.94 (m, 1H, CH(CH<sub>3</sub>)<sub>2</sub>); 2.21 (s, 3H, CH<sub>3</sub>N); 2.22 (s, 3H, CH<sub>3</sub>N); 2.25 (dd, J = 12.8 Hz, J = 5.7 Hz, 1H, CHHN); 2.31 (dd, J = 12.8 Hz, J = 9.0 Hz, 1H, CHHN); 2.42 (m, 2H, CH<sub>2</sub>N); 2.50 (m, 1H, CHHN); 2.59 (m, 1H, CHHN); 3.48 (d, J = 13.0 Hz, 1H, CHHPh); 3.52 (m, 1H, CHN); 3.53 (d, J = 13.0 Hz, 1H, CHHPh); 5.06 (br s, 1H, NH); 7.22-7.32 (m, 5H, Har). <sup>13</sup>C-NMR (101 MHz, CDCl<sub>3</sub>): δ 17.5, 18.7, (CH<sub>3</sub>); 28.4 (C(CH<sub>3</sub>)<sub>3</sub>); 30.0 (CH(CH<sub>3</sub>)<sub>2</sub>); 42.3, 42.9 (CH<sub>3</sub>N); 53.3 (CHN); 54.8, 55.3 (CH<sub>2</sub>N); 62.5 (CH<sub>2</sub>N); 62.8 (CH<sub>2</sub>Ph); 78.6 (C(CH<sub>3</sub>)<sub>3</sub>); 126.9, 128.1, 129.2 (CHar); 138.7 (Car); 156.3 (CO<sub>2</sub>tBu). IR (ATR): 3328, 2956, 2790, 1685, 1452, 1364, 1245, 1168, 1049, 1023, 740, 703 cm<sup>-1</sup>. HRMS calcd. for C<sub>21</sub>H<sub>37</sub>N<sub>3</sub>O<sub>2</sub> + Na: 386.2778; found: 386.2780.

This compound (2.05 g, 5.65 mmol) was debenzylated by hydrogenation with 615 mg of Pd-C (10 wt. %) in MeOH (50 mL) by the procedure described for the preparation of **11** and purified by flash column chromatography on silica gel (EtOAc/MeOH, 4:1) to yield **12** (1.20 g, 4.4 mmol, 78%) as a colorless oil.  $[\alpha]_D^{23} = +3.3$  (c = 1.1, CHCl<sub>3</sub>). <sup>1</sup>H-NMR (400 MHz, CDCl<sub>3</sub>): δ 0.84 (d, 3H, J = 6.9 Hz, CH<sub>3</sub>); 0.90 (d, 3H, J = 6.9 Hz, CH<sub>3</sub>); 1.43 (s, 9H, C(CH<sub>3</sub>)<sub>3</sub>); 1.87 (m, 1H, CHCH<sub>3</sub>); 2.21 (s, 3H, CH<sub>3</sub>N); 2.30 (m, 2H, CH<sub>2</sub>); 2.43 (s, 3H, CH<sub>3</sub>N); 2.49 (m, 2H, CH<sub>2</sub>); 2.61 (t, J = 5.7 Hz, 2H, CH<sub>2</sub>); 3.56 (m, 1H, CHN); 4.57 (br s, 1H, NH). <sup>13</sup>C-NMR (101 MHz, CDCl<sub>3</sub>): δ 17.0 (CH<sub>3</sub>); 19.1 (CH<sub>3</sub>); 28.3 (C(CH<sub>3</sub>)<sub>3</sub>); 29.8 (CH(CH<sub>3</sub>)<sub>2</sub>); 36.3 (CH<sub>3</sub>N); 42.3 (CH<sub>3</sub>N); 49.2 (CH<sub>2</sub>NH); 53.3 (CHN); 57.3 (CH<sub>2</sub>); 59.6 (CH<sub>2</sub>); 78.7 (C(CH<sub>3</sub>)<sub>3</sub>); 156.2 (CO<sub>2</sub>tBu). IR (ATR): 3313, 2961, 2796, 1690, 1530, 1452, 1365, 1245, 1168, 734 cm<sup>-1</sup>. HRMS calcd. for C<sub>14</sub>H<sub>31</sub>N<sub>3</sub>O<sub>2</sub> + Na: 296.2308; found: 296.2307.

**(S)-tert-Butyl (1-((6-aminohexyl)(methyl)amino)-3-methylbutan-2-yl)carbamate (13).**

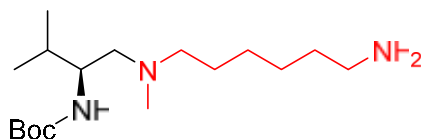

Boc-amide **9** (2.74 g, 4.85 mmol) was reduced by reaction with LAH (0.37 g, 9.7 mmol) in THF at 0 °C for 1h as described for **11** and purified by flash chromatography (hexane/EtOAc: 3/1) to yield (S)-tert-Butyl (1-((6-(dibenzylamino)hexyl)(methyl)amino)-3-methylbutan-2-yl)carbamate as a colorless oil: 1.56 g (3.15 mmol, 65% yield).  $[\alpha]_D^{23} = +2.2$  (c = 1.1, MeOH). **<sup>1</sup>H-NMR** (400 MHz, CDCl<sub>3</sub>) δ 0.84 (d, J = 6.9 Hz, 3H, CH<sub>3</sub>); 0.90 (d, J = 6.9 Hz, 3H, CH<sub>3</sub>); 1.19 (m, 2H, CH<sub>2</sub>); 1.26 (m, 2H, CH<sub>2</sub>); 1.38 (m, 2H, CH<sub>2</sub>); 1.44 (s, 9H, (CH<sub>3</sub>)<sub>3</sub>C); 1.50 (m, 2H, CH<sub>2</sub>); 1.94 (m, 1H, (CH<sub>3</sub>)<sub>2</sub>CH); 2.19 (s, 3H, CH<sub>3</sub>N); 2.28 (m, 4H, CH<sub>2</sub>); 2.39 (t, J = 7.2 Hz, 2H, CH<sub>2</sub>NBn<sub>2</sub>); 3.54 (s, 4H, CH<sub>2</sub>Ph); 3.58 (m, 1H, CHN); 4.58 (br s, 1H, NH); 7.20-7.37 (m, 10H, Har). **<sup>13</sup>C-NMR** (101 MHz, CDCl<sub>3</sub>) δ 17.0 (CH<sub>3</sub>); 18.9 (CH<sub>3</sub>); 25.5 (CH<sub>2</sub>); 26.9 (CH<sub>2</sub>); 27.1 (CH<sub>2</sub>); 27.2 (CH<sub>2</sub>); 28.4 (C(CH<sub>3</sub>)<sub>3</sub>); 29.7 ((CH<sub>3</sub>)<sub>2</sub>CH); 42.3 (CH<sub>3</sub>N); 53.2 (CH<sub>2</sub>N); 57.8 (CH<sub>2</sub>); 58.2 (CH<sub>2</sub>Ph); 58.6 (CHN); 67.8 (CH<sub>2</sub>); 78.7 (C(CH<sub>3</sub>)<sub>3</sub>); 126.6, 128.0, 128.6 (CHar); 139.9 (Car); 156.1 (CO<sub>2</sub>tBu). **IR** (ATR): 3426, 3364, 2935, 2796, 1700, 1494, 1365, 1240, 1168, 729, 698 cm<sup>-1</sup>. **HRMS** calcd. for C<sub>31</sub>H<sub>49</sub>N<sub>3</sub>O<sub>2</sub> + H: 496.3897; found: 496.3876.

This compound (6.85 g, 13.8 mmol) was debenzylated by hydrogenation with 1.37 g of Pd-C (10 wt. %) in MeOH (130 mL) by the procedure described for the preparation of **11** and purified by flash column chromatography on silica gel (EtOAc/MeOH/NH<sub>3</sub>: 4/1/0.1) to yield **13** (2.96 g, 9.4 mmol, 68%) as a colorless oil.  $[\alpha]_D^{23} = +3.2$  (c = 1.0, CHCl<sub>3</sub>). **<sup>1</sup>H-NMR** (400 MHz, CDCl<sub>3</sub>, 330K) δ 0.86 (d, J = 6.9 Hz, 3H, CH<sub>3</sub>); 0.91 (d, J = 6.9 Hz, 3H, CH<sub>3</sub>); 1.36 (m, 4H, CH<sub>2</sub>); 1.44 (s, 9H, (CH<sub>3</sub>)<sub>3</sub>C); 1.47 (m, 2H, CH<sub>2</sub>); 1.67 (m, 2H, CH<sub>2</sub>); 1.90 (m, 1H, (CH<sub>3</sub>)<sub>2</sub>CH); 2.24 (s, 3H, CH<sub>3</sub>N); 2.39 (m, 4H, CH<sub>2</sub>); 2.89 (t, J = 7.3 Hz, 2H, CH<sub>2</sub>NH<sub>2</sub>); 3.54 (m, 1H, CHN); 4.75 (br s, 1H, NH); 5.94 (br s, 2H, NH<sub>2</sub>). **<sup>13</sup>C-NMR** (101 MHz, CDCl<sub>3</sub>, 330K) δ 17.1 (CH<sub>3</sub>); 18.9 (CH<sub>3</sub>); 26.2 (CH<sub>2</sub>); 26.5 (CH<sub>2</sub>); 26.7 (CH<sub>2</sub>); 28.3 (C(CH<sub>3</sub>)<sub>3</sub>); 28.8 (CH<sub>2</sub>); 30.1 (CH(CH<sub>3</sub>)<sub>2</sub>); 40.1 (CH<sub>2</sub>NH<sub>2</sub>); 42.0 (CH<sub>3</sub>N); 53.4 (CHN); 57.5 (CH<sub>2</sub>N); 59.0 (CH<sub>2</sub>N); 78.6 (C(CH<sub>3</sub>)<sub>3</sub>); 156.1 (CO<sub>2</sub>tBu). **IR** (ATR): 3346, 2957, 2931, 1685, 1519, 1389, 1363, 1249, 1171 cm<sup>-1</sup>. **HRMS** calcd. for C<sub>17</sub>H<sub>37</sub>N<sub>3</sub>O<sub>2</sub> + H: 316.2958; found: 316.2960.

**(S)-tert-Butyl (3-methyl-1-(methyl(6-(methylamino)hexyl)amino)butan-2-yl) carbamate (14).**

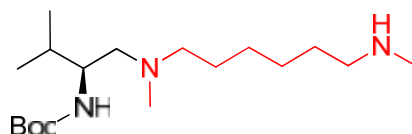

This compound was obtained from Boc–amide **10** (2.37 g, 6.9 mmol) by reaction with LAH (0.52 g, 13.8 mmol) in THF at 0 °C for 1h as described for **11** and purified by flash chromatography (CH<sub>2</sub>Cl<sub>2</sub>/MeOH: 3/2 to CH<sub>2</sub>Cl<sub>2</sub>/MeOH/NH<sub>3</sub>: 3/2/0.1): 1.42 g (4.3 mmol, 62% yield). Colorless oil.  $[\alpha]_D^{23} = +3.6$  (c = 1, CHCl<sub>3</sub>). **<sup>1</sup>H-NMR** (400 MHz, CDCl<sub>3</sub>) δ 0.85 (d, J = 6.9 Hz, 3H, CH<sub>3</sub>); 0.91 (d, J = 6.9 Hz, 3H, CH<sub>3</sub>); 1.32 (m, 4H, CH<sub>2</sub>); 1.45 (s, 9H, (CH<sub>3</sub>)<sub>3</sub>C); 1.48 (m, 4H, CH<sub>2</sub>); 1.95 (m, 1H, (CH<sub>3</sub>)<sub>2</sub>CH); 2.20 (s, 3H, CH<sub>3</sub>N); 2.29 (m, 3H, CH<sub>2</sub> and CHHN); 2.35 (m, 1H, CHHN); 2.43 (s, 3H, CH<sub>3</sub>N); 2.57 (t, J = 7.2 Hz, 2H, CH<sub>2</sub>NH); 3.57 (m, 1H, CHN); 4.55 (br s, 1H, NHBoc). **<sup>13</sup>C-NMR** (101 MHz, CDCl<sub>3</sub>) δ 16.9 (CH<sub>3</sub>); 18.8 (CH<sub>3</sub>); 27.0 (CH<sub>2</sub>); 27.1 (CH<sub>2</sub>); 28.2 ((CH<sub>3</sub>)<sub>3</sub>C); 29.6 (CH<sub>2</sub>); 29.7 ((CH<sub>3</sub>)<sub>2</sub>CH); 36.2 (CH<sub>3</sub>N); 42.2 (CH<sub>3</sub>N); 51.8 (CH<sub>2</sub>NH); 58.6 (CHN); 78.5 ((CH<sub>3</sub>)<sub>3</sub>C); 156.0 (CO<sub>2</sub>tBu). **IR** (ATR): 3332, 2935, 2857, 2789, 1698, 1458, 1364, 1243, 1175, 862, 734 cm<sup>-1</sup>. **HRMS** calcd. for C<sub>18</sub>H<sub>39</sub>N<sub>3</sub>O<sub>3</sub> + H: 330.3115; found: 330.3116.

**Preparation of Resin 15.**

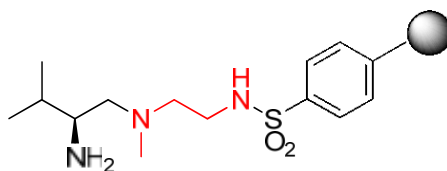

Chlorosulfonyl polystyrene (1.0 g, 1.9 mmol) was added to a solution of Boc-amine **11** (0.98 g, 3.8 mmol, 2 equiv) and Et<sub>3</sub>N (0.27 mL, 1.9 mmol, 1 equiv) in anhydrous CH<sub>2</sub>Cl<sub>2</sub> (60 mL) at room temperature. The resulting mixture was stirred for four days. The polymer was then filtered off and washed successively with methanol, water, methanol/water (1:1), and methanol. The material was dried under vacuum to give 1.41 g of polymer Boc-**15** (100% yield), which corresponds to approximately 90 % of ligand incorporation and an effective functionalization,  $f = 1.36$  mmol g<sup>-1</sup>, calculated on the basis of elemental analysis (Found: C: 64.84, H: 7.32, N: 5.73, S: 4.82). **IR** (ATR): 3255, 2961, 2915, 1700, 1452, 1318, 1158, 692 cm<sup>-1</sup>.

Resin Boc-**15** (1.40 g) was suspended in a 4:1 mixture of CH<sub>2</sub>Cl<sub>2</sub>/TFA (7.5 mL) and stirred at rt for 18 h. After this period, the resin was filtered and washed with MeOH/Et<sub>3</sub>N 98:2 (100 mL), water (100 mL), and diethyl ether (100 mL). The yellow resin was dried under vacuum to give 1.08 g of polymer **15** (90% yield) which corresponds to approximately 93 % of ligand incorporation and an effective functionalization,  $f = 1.59 \text{ mmol g}^{-1}$ , calculated on the basis of elemental analysis (Found: C: 67.42, H: 7.31, N: 6.70, S: 5.73. **IR** (ATR): 3222, 2925, 1690, 1602, 1452, 1313, 1153, 693 cm<sup>-1</sup>).

### Preparation of Resin 16.

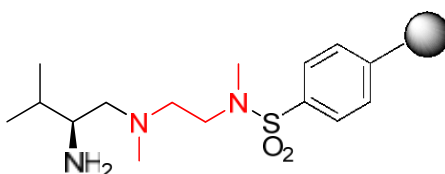

The same procedure for resin **15** was followed, using chlorosulfonyl polystyrene (790 mg, 1.5 mmol) and **12** (820 mg, 3.0 mmol) to give 1.17 g of polymer Boc-**16** (100% yield), which corresponds to approximately 97 % of ligand incorporation and an effective functionalization,  $f = 1.42 \text{ mmol g}^{-1}$ , calculated on the basis of elemental analysis (Found: C, 66.70; H, 7.44; N, 5.97, S, 4.70). **IR** (ATR): 3380, 2966, 2930, 1695, 1509, 1447, 1339, 1158, 703 cm<sup>-1</sup>.

Resin Boc-**16** (1.1 g) was treated with a 4:1 mixture of CH<sub>2</sub>Cl<sub>2</sub>/TFA (6 mL) as described for Boc-**15** to give 950 mg of polymer **16** (100% yield) which corresponds to approximately 96 % of ligand incorporation and an effective functionalization,  $f = 1.56 \text{ mmol g}^{-1}$ , calculated on the basis of elemental analysis (Found: C, 62.62; H, 6.99; N, 6.57, S, 5.20). **IR** (ATR): 2925, 1680, 1592, 1452, 1333, 1152, 703 cm<sup>-1</sup>.

### Preparation of Resin 17.

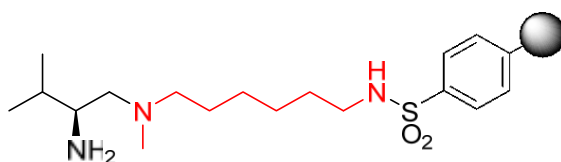

The same procedure for resin **15** was followed, using chlorosulfonyl polystyrene (1.8 g, 3.35 mmol) and **13** (2.1 g, 6.7 mmol) to give 2.88 g of polymer Boc-**17** (100% yield), which corresponds to approximately 92 % of ligand incorporation and an effective functionalization,  $f = 1.32 \text{ mmol g}^{-1}$ , calculated on the basis of elemental analysis

(Found: C: 68.57, H: 8.06, N: 5.54, S: 4.58. IR (ATR): 3273, 2926, 1685, 1493, 1452, 1322, 1151, 699, 579 cm<sup>-1</sup>).

Resin Boc-**17** (2.87 g) was treated with a 4:1 mixture of CH<sub>2</sub>Cl<sub>2</sub>/TFA (14 mL) as described for Boc-**15** to give 2.47 g of polymer **17** (99% yield) which corresponds to approximately 93 % of ligand incorporation and an effective functionalization,  $f = 1.51$  mmol g<sup>-1</sup>, calculated on the basis of elemental analysis (Found: C: 70.47, H: 8.00, N: 6.32, S: 5.18. IR (ATR): 3273, 2926, 2853, 1597, 1451, 1322, 1156, 1094, 699, 579 cm<sup>-1</sup>).

### Preparation of Resin **18**.

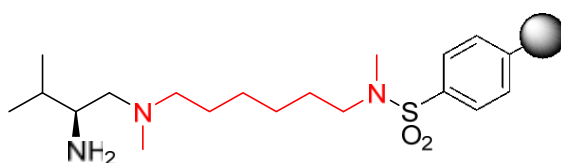

The same procedure for resin **15** was followed, using chlorosulfonyl polystyrene (953 mg, 1.81 mmol) and **14** (1.19 g, 3.62 mmol) to give 1.44 g of polymer Boc-**18** (97% yield), which corresponds to approximately 95 % of ligand incorporation and an effective functionalization,  $f = 1.33$  mmol g<sup>-1</sup>, calculated on the basis of elemental analysis (Found: C: 72.42, H: 8.36, N: 5.57, S: 4.48. IR (ATR): 3379, 2933, 1702, 1490, 1453, 1336, 1161, 1087, 699, 572 cm<sup>-1</sup>).

Resin Boc-**18** (1.48 g) was treated with a 4:1 mixture of CH<sub>2</sub>Cl<sub>2</sub>/TFA (10 mL) as described for Boc-**15** to give 1.04 g of polymer **18** (80% yield) which corresponds to approximately 94 % of ligand incorporation and an effective functionalization,  $f = 1.48$  mmol g<sup>-1</sup>, calculated on the basis of elemental analysis (Found: C: 69.75, H: 8.02, N: 6.23, S: 5.08. IR (ATR): 3375, 2928, 1596, 1490, 1453, 1410, 1336, 1158, 1092, 699, 577 cm<sup>-1</sup>).

### Preparation of Resin **19**.

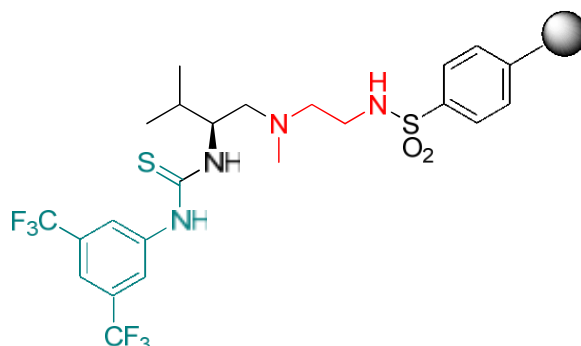

To a suspension of the resin **15** (340 mg, 0.54 mmol) in anhydrous CH<sub>2</sub>Cl<sub>2</sub> (3 mL) was added 3,5-bis(trifluoromethyl)phenyl isothiocyanate (0.3 mL, 1.62 mmol, 3 equiv) at 0 °C under argon. The resulting suspension was stirred for overnight at room temperature. The resin was collected by filtration, washed with CH<sub>2</sub>Cl<sub>2</sub>, and dried under vacuum to give 480 mg of polymer (99% yield). **IR** (ATR): 3294, 2926, 1675, 1535, 1472, 1457, 1379, 1275, 1130, 694, 678 cm<sup>-1</sup>. An effective functionalization,  $f = 0.95 \text{ mmol g}^{-1}$ , was calculated on the basis of nitrogen and sulfur elemental analysis (C: 52.86, H: 4.97, N: 5.31, S: 6.23).

### Preparation of Resin 20.

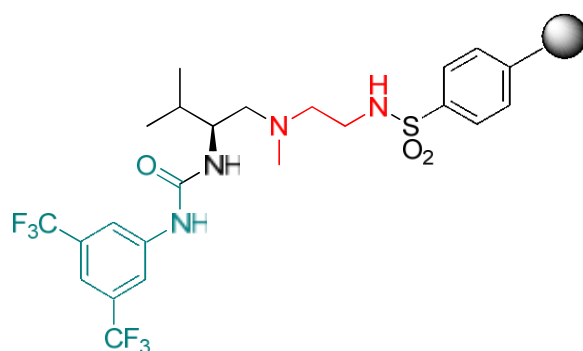

To a suspension of the resin **15** (150 mg, 0.24 mmol) in anhydrous CH<sub>2</sub>Cl<sub>2</sub> (1 mL) was added 3,5-bis(trifluoromethyl)phenyl isocyanate (0.12 mL, 0.72 mmol, 3 equiv) at 0 °C under nitrogen atmosphere. The resulting suspension was stirred for overnight at room temperature. The resin was collected by filtration, washed with CH<sub>2</sub>Cl<sub>2</sub>, and dried under vacuum to give 152 mg of polymer **20**. **IR** (ATR): 3360, 1700, 1554, 1471, 1390, 1276, 1125, 682 cm<sup>-1</sup>. An effective functionalization,  $f = 1.11 \text{ mmol g}^{-1}$ , was calculated on the basis of nitrogen and sulfur elemental analysis (C: 53.82, H: 4.10, N: 6.21, S: 2.98).

### Preparation of Resin 21.

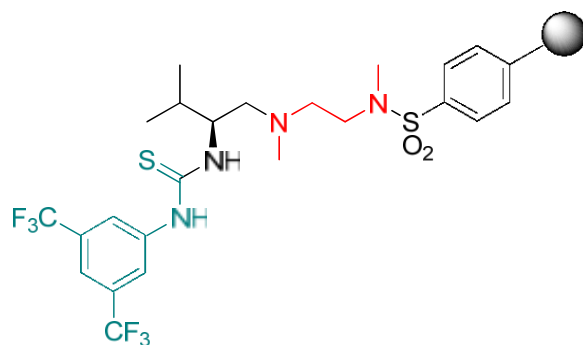

The same procedure for resin **19** was followed, using resin **16** (480 mg, 0.75 mmol) and 3,5-bis(trifluoromethyl)phenyl isothiocyanate (0.41 mL, 2.25 mmol) as reactants. Yield: 642 mg (94%). **IR** (ATR): 3320, 2962, 2930, 1680, 1535, 1472, 1384, 1275, 1125, 886, 699, 678  $\text{cm}^{-1}$ . An effective functionalization,  $f = 1.10 \text{ mmol g}^{-1}$ , was calculated on the basis of nitrogen and sulfur elemental analysis (C: 57.73, H: 5.46, N: 6.18, S: 7.16).

### Preparation of Resin 22.

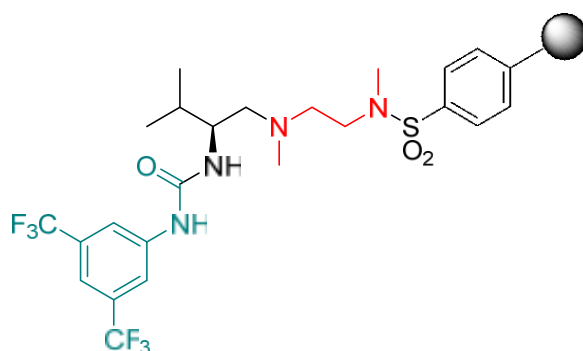

The same procedure for resin **19** was followed, using resin **16** (300 mg, 0.47 mmol) and 3,5-bis(trifluoromethyl)phenyl isocyanate (0.09 mL, 0.52 mmol, 1.1 equiv) as reactants. Yield: 363 mg (85%). **IR** (ATR): 3351, 2967, 2936, 1670, 1561, 1472, 1384, 1275, 1125, 880, 704, 683  $\text{cm}^{-1}$ . An effective functionalization,  $f = 1.11 \text{ mmol g}^{-1}$ , was calculated on the basis of nitrogen and sulfur elemental analysis (C: 53.57, H: 4.81, N: 6.22, S: 3.42).

### Preparation of Resin 23.

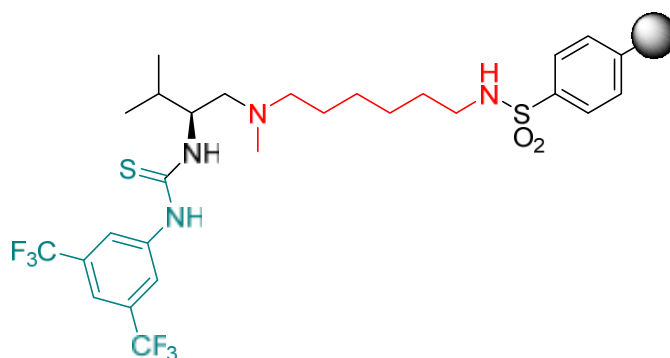

The same procedure for resin **19** was followed, using resin **17** (1.0 g, 1.505 mmol) and 3,5-bis(trifluoromethyl)phenyl isothiocyanate (0.82 mL, 4.51 mmol) as reactants. Yield: 1.365 g (97%). **IR** (ATR): 3283, 2931, 2858, 1675, 1540, 1467, 1379, 1275, 1130, 886, 699, 678, 579  $\text{cm}^{-1}$ . An effective functionalization,  $f = 1.05 \text{ mmol g}^{-1}$ , was

calculated on the basis of nitrogen and sulfur elemental analysis (C: 61.08, H: 6.07, N: 5.89, S: 6.99).

#### Preparation of Resin 24.

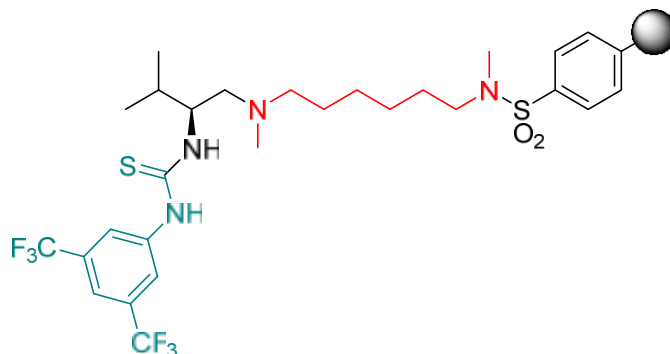

The same procedure for resin **19** was followed, using resin **18** (1.02 g, 1.45 mmol) and 3,5-bis(trifluoromethyl)phenyl isothiocyanate (0.8 mL, 4.35 mmol) as reactants. Yield: 1.28 g (91%). **IR** (ATR): 3311, 2928, 1596, 1532, 1469, 1384, 1336, 1273, 1129, 694, 678, 577  $\text{cm}^{-1}$ . An effective functionalization,  $f = 1.04 \text{ mmol g}^{-1}$ , was calculated on the basis of nitrogen and sulfur elemental analysis (C: 59.92, H: 6.07, N: 5.80, S: 6.76).

#### (S)-tert-Butyl 1-(((6-(N,4-dimethylphenylsulfonamido)hexyl)(methyl)amino)-3-methylbutan-2-yl)carbamate (**25**).

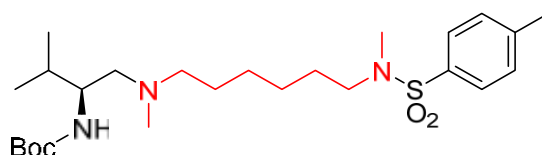

To a solution of **14** (340 mg, 1.03 mmol) in  $\text{CH}_2\text{Cl}_2$  (12 mL) at 0 °C were added  $\text{Et}_3\text{N}$  (0.16 mL, 1.24 mmol, 1.2 equiv), 4-methylbenzenesulfonyl chloride (236 mg, 1.24 mmol, 1.2 equiv), and the mixture was stirred at room temperature for 2h. After addition of aqueous saturated  $\text{NH}_4\text{Cl}$  solution (7 mL), the mixture was extracted with  $\text{CH}_2\text{Cl}_2$  (4 x 5 mL). The extract was dried over anhydrous  $\text{MgSO}_4$ , filtrated, and then the filtrate was evaporated *in vacuo*. The residue was purified by silica gel flash chromatography using ethyl acetate as eluent to afford compound **25** (315 mg, 0.65 mmol, 63%). Colorless oil.  $[\alpha]_{\text{D}}^{23} = + 1.4$  ( $c = 1.0$ ,  $\text{CHCl}_3$ ).  $[\alpha]_{\text{D}}^{23} = + 3.0$  ( $c = 1.0$ , MeOH).  **$^1\text{H-NMR}$**  (400 MHz,  $\text{CDCl}_3$ )  $\delta$  0.83 (d, 3H,  $\text{J} = 6.9 \text{ Hz}$ ,  $\text{CH}_3\text{CH}$ ); 0.89 (d, 3H,  $\text{J} = 6.9 \text{ Hz}$ ,  $\text{CH}_3\text{CH}$ ); 1.29 (m, 4H,  $\text{CH}_2$ ); 1.39 (m, 2H,  $\text{CH}_2$ ); 1.41 (s, 9H,  $\text{C}(\text{CH}_3)_3$ ); 1.49 (m, 2H,  $\text{CH}_2$ ); 1.91 (m, 1H,  $\text{CH}(\text{CH}_3)_2$ ); 2.17 (s, 3H,  $\text{CH}_3\text{N}$ ); 2.26 (m, 3H,  $\text{CH}_2\text{N}$  and



$\underline{\text{CHHN}}$ ); 2.33 (dt, 1H,  $J = 12.4$  Hz,  $J = 7.3$  Hz,  $\underline{\text{CHHN}}$ ); 2.40 (s, 3H,  $\underline{\text{CH}_3\text{Ar}}$ ); 2.67 (s, 3H,  $\underline{\text{CH}_3\text{N}}$ ); 2.94 (td, 2H,  $J = 7.0$  Hz,  $J = 1.8$  Hz,  $\underline{\text{CH}_2\text{NHTs}}$ ); 3.55 (m, 1H,  $\underline{\text{CHN}}$ ); 4.56 (br s, 1H,  $\underline{\text{NHBoc}}$ ); 7.29 (d, 2H,  $J = 8.1$  Hz,  $\underline{\text{Har}}$ ); 7.64 (d, 2H,  $J = 8.1$  Hz,  $\underline{\text{Har}}$ ).  $^{13}\text{C-NMR}$  (101 MHz,  $\text{CDCl}_3$ )  $\delta$  17.0 ( $\underline{\text{CH}_3}$ ); 18.9 ( $\underline{\text{CH}_3}$ ); 21.4 ( $\underline{\text{CH}_3\text{Ar}}$ ); 26.4 ( $\underline{\text{CH}_2}$ ); 26.9 ( $\underline{\text{CH}_2}$ ); 27.1 ( $\underline{\text{CH}_2}$ ); 27.5 ( $\underline{\text{CH}_2}$ ); 28.3 ( $\underline{\text{CCH}_3}$ ); 29.8 ( $\underline{\text{CH}(\text{CH}_3)_2}$ ); 34.5 ( $\underline{\text{CH}_3\text{N}}$ ); 42.3 ( $\underline{\text{CH}_3\text{N}}$ ); 49.9 ( $\underline{\text{CH}_2\text{NHTs}}$ ); 52.9 ( $\underline{\text{CHN}}$ ); 57.7 ( $\underline{\text{CH}_2\text{N}}$ ); 58.7 ( $\underline{\text{CH}_2\text{N}}$ ); 78.7 ( $\underline{\text{C}(\text{CH}_3)_3}$ ); 127.3, 129.5 ( $\underline{\text{CHar}}$ ); 134.5, 143.0 ( $\underline{\text{Car}}$ ); 156.1 ( $\underline{\text{CO}_2\text{tBu}}$ ). **IR** (ATR): 3390, 2960, 2933, 2859, 2790, 1702, 1458, 1341, 1161, 1087, 736, 715, 651, 545  $\text{cm}^{-1}$ . **HRMS** calcd. for  $\text{C}_{25}\text{H}_{45}\text{N}_3\text{O}_4\text{S} + \text{H}$ : 484.3204; found: 4843207.

**(S)-N-(6-((2-(3-(3,5-bis(trifluoromethyl)phenyl)thioureido)-3-methylbutyl)(methylamino)hexyl)-N,4-dimethylbenzenesulfonamide (26).**

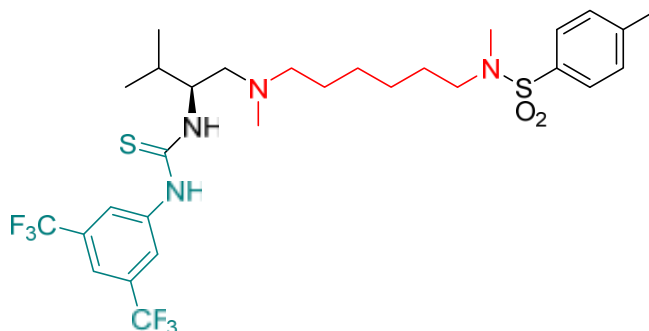

Compound **25** (426 mg, 0.88 mmol) was dissolved in a 1/4 mixture of TFA/ $\text{CH}_2\text{Cl}_2$  (2 mL) and stirred at rt for 3 h. The mixture was basified with concentrated ammonia solution and extracted with dichloromethane (4 x 10 mL). After removal of the solvent under reduced pressure, the residue was used for the subsequent step without further purification to yield (S)-N-(6-((2-amino-3-methylbutyl)(methylamino)hexyl)-N,4-dimethylbenzenesulfonamide as a colorless oil: 305 mg (0.79 mmol, 90%).  $[\alpha]_{\text{D}}^{23} = +27.5$  ( $c = 1.0$ ,  $\text{CHCl}_3$ ).  $^1\text{H-NMR}$  (400 MHz,  $\text{CDCl}_3$ )  $\delta$  0.91 (d, 3H,  $J = 6.9$  Hz,  $\underline{\text{CH}_3\text{CH}}$ ); 0.93 (d, 3H,  $J = 6.9$  Hz,  $\underline{\text{CH}_3\text{CH}}$ ); 1.31 (m, 4H,  $\underline{\text{CH}_2}$ ); 1.43 (m, 2H,  $\underline{\text{CH}_2}$ ); 1.51 (m, 2H,  $\underline{\text{CH}_2}$ ); 1.59 (m, 1H,  $\underline{\text{CH}(\text{CH}_3)_2}$ ); 2.19 (s, 3H,  $\underline{\text{CH}_3\text{N}}$ ); 2.25 (m, 3H,  $\underline{\text{CHHN}}$  and  $\underline{\text{CH}_2\text{N}}$ ); 2.39 (m, 1H,  $\underline{\text{CHHN}}$ ); 2.41 (s, 3H,  $\underline{\text{CH}_3\text{Ar}}$ ); 2.68 (s, 3H,  $\underline{\text{CH}_3\text{N}}$ ); 2.70 (m, 1H,  $\underline{\text{CHNH}_2}$ ); 2.92 (br s, 2H,  $\underline{\text{NH}_2}$ ); 2.95 (t, 2H,  $J = 7.2$  Hz,  $\underline{\text{CH}_2\text{NHTs}}$ ); 7.30 (d, 2H,  $J = 8.2$  Hz,  $\underline{\text{Har}}$ ); 7.64 (d, 2H,  $J = 8.2$  Hz,  $\underline{\text{Har}}$ ).  $^{13}\text{C-NMR}$  (101 MHz,  $\text{CDCl}_3$ )  $\delta$  18.2 ( $\underline{\text{CH}_3}$ ); 19.0 ( $\underline{\text{CH}_3}$ ); 21.3 ( $\underline{\text{CH}_3\text{Ar}}$ ); 26.2 ( $\underline{\text{CH}_2}$ ); 26.7 ( $\underline{\text{CH}_2}$ ); 27.0 ( $\underline{\text{CH}_2}$ ); 27.3 ( $\underline{\text{CH}_2}$ ); 31.4 ( $\underline{\text{CH}(\text{CH}_3)_2}$ ); 34.4 ( $\underline{\text{CH}_3\text{N}}$ ); 42.1 ( $\underline{\text{CH}_3\text{N}}$ ); 49.8 ( $\underline{\text{CH}_2\text{NHTs}}$ ); 53.8 ( $\underline{\text{CHN}}$ ); 57.9 ( $\underline{\text{CH}_2\text{N}}$ ); 61.3 ( $\underline{\text{CH}_2\text{N}}$ ); 127.2, 129.4 ( $\underline{\text{CHar}}$ ); 134.3, 143.0 ( $\underline{\text{Car}}$ ). **IR** (ATR): 3374, 2933, 2859, 2790, 1692,

1458, 1336, 1161, 816, 715, 651, 550  $\text{cm}^{-1}$ . **HRMS** calcd. for  $\text{C}_{20}\text{H}_{37}\text{N}_3\text{O}_2\text{S} + \text{H}$ : 384.2680; found: 384.2679.

To a solution of this compound (258 mg, 0.67 mmol) in anhydrous  $\text{CH}_2\text{Cl}_2$  (2 mL) was added 3,5-bis(trifluoromethyl)phenyl isothiocyanate (0.14 mL, 0.74 mmol, 1.1 equiv) at 0 °C under argon. The resulting solution was stirred for overnight at room temperature. The reaction was concentrated in *vacuo* and the residue was purified by flash chromatography ( $\text{CH}_2\text{Cl}_2$  to  $\text{CH}_2\text{Cl}_2/\text{MeOH}$ : 30/1) to yield **26**: 268 mg (0.41 mmol, 61%). Colorless oil.  $[\alpha]_{\text{D}}^{23} = -19.4$  ( $c = 1.0$ ,  $\text{CHCl}_3$ ).  **$^1\text{H-NMR}$**  (400 MHz,  $\text{CDCl}_3$ )  $\delta$  1.04 (d, 6H,  $J = 6.8$  Hz,  $\underline{\text{CH}_3\text{CH}}$ ); 1.29 (m, 4H,  $\underline{\text{CH}_2}$ ); 1.43 (m, 4H,  $\underline{\text{CH}_2}$ ); 1.94 (m, 1H,  $\underline{\text{CH}}(\text{CH}_3)_2$ ); 2.42 (s, 6H,  $\underline{\text{CH}_3\text{N}}$  and  $\underline{\text{CH}_3\text{Ar}}$ ); 2.53 (m, 1H,  $\underline{\text{CHHN}}$ ); 6.64 (s, 3H,  $\underline{\text{CH}_3\text{N}}$ ); 2.70 (m, 1H,  $\underline{\text{CHHN}}$ ); 2.79 (m, 1H,  $\underline{\text{CHHN}}$ ); 2.90 (m, 2H,  $\underline{\text{CH}_2\text{NHTs}}$ ); 2.97 (m, 1H,  $\underline{\text{CHHN}}$ ); 3.58 (m, 1H,  $\underline{\text{CHN}}$ ); 6.26 (br s, 1H,  $\underline{\text{NH}}$ ); 7.31 (d, 2H,  $J = 8.0$  Hz,  $\underline{\text{Har}}$ ); 7.58 (s, 1H,  $\underline{\text{Har}}$ ); 7.64 (d, 2H,  $J = 8.0$  Hz,  $\underline{\text{Har}}$ ); 8.02 (s, 2H,  $\underline{\text{Har}}$ ); 13.16 (br s, 1H,  $\underline{\text{NH}}$ ).  **$^{13}\text{C-NMR}$**  (101 MHz,  $\text{CDCl}_3$ )  $\delta$  18.0 ( $\underline{\text{CH}_3}$ ); 18.3 ( $\underline{\text{CH}_3}$ ); 21.2 ( $\underline{\text{CH}_3\text{Ar}}$ ); 25.9 ( $\underline{\text{CH}_2}$ ); 26.6 ( $\underline{\text{CH}_2}$ ); 26.7 ( $\underline{\text{CH}_2}$ ); 27.0 ( $\underline{\text{CH}_2}$ ); 31.3 ( $\underline{\text{CH}}(\text{CH}_3)_2$ ); 34.3 ( $\underline{\text{CH}_3\text{N}}$ ); 42.1 ( $\underline{\text{CH}_3\text{N}}$ ); 49.5 ( $\underline{\text{CH}_2\text{NHTs}}$ ); 58.0 ( $\underline{\text{CH}_2\text{N}}$ ); 60.0 ( $\underline{\text{CHN}}$ ); 62.3 ( $\underline{\text{CH}_2\text{N}}$ ); 117.1 ( $\underline{\text{CHar}}$ ); 122.8 ( $\underline{\text{CHar}}$ ); 123.0 ( $\underline{\text{CF}_3}$ ); 127.1, 129.5 ( $\underline{\text{CHar}}$ ); 131.3 ( $\underline{\text{CCF}_3}$ ); 133.9, 142.0, 143.2 ( $\underline{\text{Car}}$ ); 182.8 ( $\underline{\text{C=S}}$ ).  **$^{19}\text{F-NMR}$**  (376 MHz,  $\text{CDCl}_3$ ): -62.97. **IR** (ATR): 3327, 2931, 2860, 1674, 1538, 1467, 1387, 1340, 1274, 1128, 883, 751, 549  $\text{cm}^{-1}$ . **HRMS** calcd. for  $\text{C}_{29}\text{H}_{40}\text{F}_6\text{N}_4\text{O}_2\text{S}_2 + \text{H}$ : 655.2570; found: 655.2580.

**General procedure for the preparation of N-Boc imines – illustrated for the synthesis of imine **29a**.**<sup>4</sup>

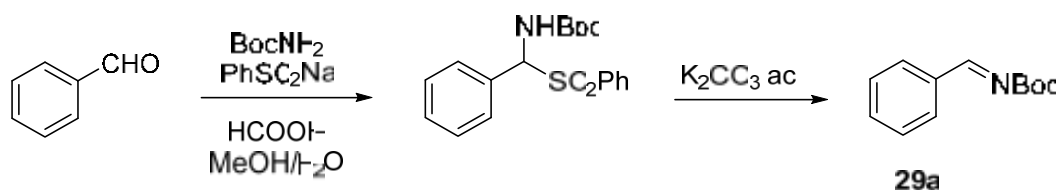

*Preparation of  $\alpha$ -sulfonyl amine:* A mixture of benzaldehyde (2.10 mL, 20.0 mmol, 2 equiv), *tert*-butyl carbamate (1.17 g, 10.0 mmol, 1 equiv), benzenesulfinic acid sodium salt (4.11 g, 25.0 mmol, 2.5 equiv) and formic acid (0.760 mL, 20.0 mmol, 2 equiv) in methanol (10 mL) and water (20 mL) was stirred at room temperature for 24 h. The resulting precipitate was filtered and washed well with diethyl ether. After drying under vacuum, the product was obtained as a white solid (2.61 g, 7.50 mmol, 75%). Mp 169–170 °C. <sup>1</sup>H-NMR (500 MHz, CDCl<sub>3</sub>)  $\delta$  1.22 (s, 9H, CH<sub>3</sub>), 5.75 (d,  $J$  = 10.0 Hz, 1H, CHN), 5.90 (d,  $J$  = 10.0 Hz, 1H, NH), 7.34–7.47 (m, 5H, Har), 7.47–7.56 (m, 2H, Har), 7.58–7.68 (m, 1H, Har), 7.89 (d,  $J$  = 7.2 Hz, 2H, Har).

*Preparation of N-Boc imine **29a**:* To a solution of  $\alpha$ -amido sulfone (347 mg, 1.0 mmol, 1 equiv) in CH<sub>2</sub>Cl<sub>2</sub> (16 mL) was added *aq.* 1.4 M K<sub>2</sub>CO<sub>3</sub> solution (16 mL). The resulting mixture was stirred at rt vigorously for 5 hours. The aqueous layer was separated and extracted with CH<sub>2</sub>Cl<sub>2</sub> (2  $\times$  20 mL). The combined organic extracts were dried (Na<sub>2</sub>SO<sub>4</sub>), filtered and concentrated to give imine **29a** as a colorless oil (185 mg, 0.9 mmol, 90%). <sup>1</sup>H-NMR (500 MHz, CDCl<sub>3</sub>):  $\delta$  1.59 (s, 9H, CH<sub>3</sub>); 7.45–7.55 (m, 3H, Har); 7.91 (m, 2H, Har); 8.87 (s, 1H, CH=N).

**(*E*)-*tert*-Butyl 4-nitrobenzylidenecarbamate (**29b**).**<sup>4</sup>

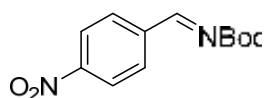

<sup>1</sup>H-NMR (500 MHz, CDCl<sub>3</sub>):  $\delta$  1.58 (s, 9H, CH<sub>3</sub>), 8.04 (d,  $J$  = 8.7 Hz, 2H, Har), 8.30 (d,  $J$  = 9 Hz, 2H, Har), 8.85 (s, 1H, CH=N).

**(*E*)-*tert*-Butyl 4-chlorobenzylidenecarbamate (**29c**).**<sup>6</sup>

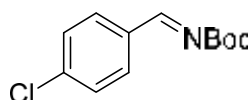

$^1\text{H-NMR}$  (500 MHz,  $\text{CDCl}_3$ )  $\delta$  1.59 (9H, s,  $\text{CH}_3$ ), 7.45 (d,  $J = 8.4$  Hz, 2H,  $\text{Har}$ ), 7.85 (d, 2H,  $J = 8.4$  Hz,  $\text{Har}$ ), 8.83 (s, 1H,  $\text{CH}=\text{N}$ ).

**(E)-tert-Butyl 2-chlorobenzylidenecarbamate (29d).**<sup>6</sup>

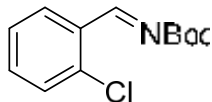

$^1\text{H-NMR}$  (500 MHz,  $\text{CDCl}_3$ ):  $\delta$  1.57 (s, 9H,  $\text{CH}_3$ ), 7.31 (m, 1H,  $\text{Har}$ ), 7.42 (m, 2H,  $\text{Har}$ ), 8.16 (d,  $J = 7.5$  Hz, 1H,  $\text{Har}$ ), 9.25 (s, 1H,  $\text{CH}=\text{N}$ ).

**(E)-tert-Butyl 3-chlorobenzylidenecarbamate (29e).**<sup>6</sup>

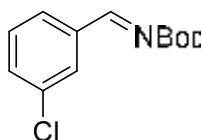

$^1\text{H-NMR}$  (500 MHz,  $\text{CDCl}_3$ ):  $\delta$  1.56 (s, 9H,  $\text{CH}_3$ ), 7.37 (t,  $J = 7.5$  Hz, 1H,  $\text{Har}$ ), 7.48 (t,  $J = 7.2$  Hz, 1H,  $\text{Har}$ ), 7.72 (d,  $J = 7.2$  Hz, 1H,  $\text{Har}$ ), 7.91 (s, 1H,  $\text{Har}$ ), 8.76 (s, 1H,  $\text{CH}=\text{N}$ ).

**(E)-tert-Butyl 4-trifluoromethylbenzylidenecarbamate (29f).**<sup>4</sup>

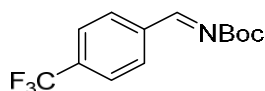

$^1\text{H-NMR}$  (500 MHz,  $\text{CDCl}_3$ ):  $\delta$  1.60 (s, 9H,  $\text{CH}_3$ ), 7.73 (d,  $J = 8.7$  Hz, 2H,  $\text{Har}$ ), 8.02 (d,  $J = 8.7$  Hz, 2H,  $\text{Har}$ ), 8.86 (s, 1H,  $\text{CH}=\text{N}$ ).

**(E)-tert-Butyl 4-methoxybenzylidenecarbamate (29g).**<sup>4</sup>

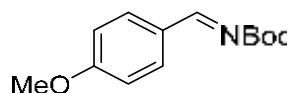

$^1\text{H-NMR}$  (500 MHz,  $\text{CDCl}_3$ ):  $\delta$  1.56 (s, 9H,  $\text{CH}_3$ ), 3.85 (s, 3H,  $\text{CH}_3$ ), 6.94 (d,  $J = 8.7$  Hz, 2H,  $\text{Har}$ ), 7.87 (d,  $J = 8.7$  Hz, 2H,  $\text{Har}$ ), 8.86 (s, 1H,  $\text{CH}=\text{N}$ ).

**(E)-tert-Butyl 4-methylbenzylidenecarbamate (29h).**<sup>4</sup>

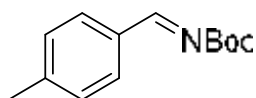

<sup>1</sup>H-NMR (500 MHz, CDCl<sub>3</sub>) δ 1.59 (s, 9H, CH<sub>3</sub>), 2.42 (3H, s, CH<sub>3</sub>), 7.27 (d, 2H, *J* = 7.7 Hz, Har), 7.81 (2H, d, *J* = 8.1 Hz, Har), 8.87 (1H, s, CH=N).

(*E*)-*tert*-Butyl naphthalen-2-ylmethylenecarbamate (**29i**).<sup>5</sup>

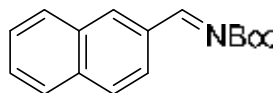

<sup>1</sup>H-NMR (500 MHz, CDCl<sub>3</sub>): δ 1.60 (s, 9H, CH<sub>3</sub>), 7.59 (m, 2H, Har), 7.85-8.93 (m, 3H, Har), 8.07 (dd, *J* = 8.7, 1.5 Hz, 1H, Har), 8.27 (s, 1H, Har), 9.03 (s, 1H, CH=N).

(*E*)-*tert*-Butyl naphthalen-1-ylmethylenecarbamate (**29j**).<sup>6</sup>

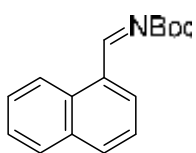

<sup>1</sup>H-NMR (500 MHz, CDCl<sub>3</sub>) δ 1.63 (s, 9H, CH<sub>3</sub>), 7.56-7.58 (m, 2H, Har), 7.66 (m, 1H, Har), 7.93 (d, *J* = 7.7 Hz, 1H, Har), 8.05 (d, *J* = 8.4 Hz, 1H, Har), 8.17 (d, *J* = 7.0 Hz, 1H, Har), 8.93 (d, *J* = 8.4 Hz, 1H, Har), 9.54 (s, 1H, CH=N).

(*E*)-*tert*-Butyl furan-2-ylmethylenecarbamate (**29k**).<sup>5</sup>

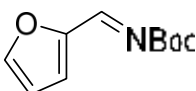

<sup>1</sup>H-NMR (500 MHz, CDCl<sub>3</sub>): δ 1.57 (s, 9H, CH<sub>3</sub>), 6.60 (s, 1H, Har), 7.24 (s, 1H, Har), 7.69 (s, 1H, Har), 8.77 (s, 1H, CH=N).

## References:

<sup>1</sup> PCT Int. Appl. **1997**, WO 9724343 A1 19970710. CAS: 193350-70-8.

<sup>2</sup> J. Krapcho, C. F. Turk, *Journal of Medicinal Chemistry*, **1963**, 6(5), 547-50. CAS: 84199-02-0.

<sup>3</sup> U. Azzena, G. Dettori, L. Pisano and I. Siotto, *Tetrahedron*, **2005**, 31, 3177–3182. CAS: 102-11-4.

<sup>4</sup> M. T. Robak, M. Trincado, J.A. Ellman, *J. Am. Chem. Soc.*, **2007**, 129, 15110.

<sup>5</sup> Helena M. Lovick, Forrest E. Michael *Tetrahedron*, **2009**, 50, 1016.

<sup>6</sup> C. Rampalagos, W. Wulff, *Adv. Synth. Catal.* **2008**, 350, 1785.

## 2. NMR Spectra for New Compounds.

### 2-(*tert*-Butoxycarbonylamino)-*N,N*-dibenzylacetamide (1).

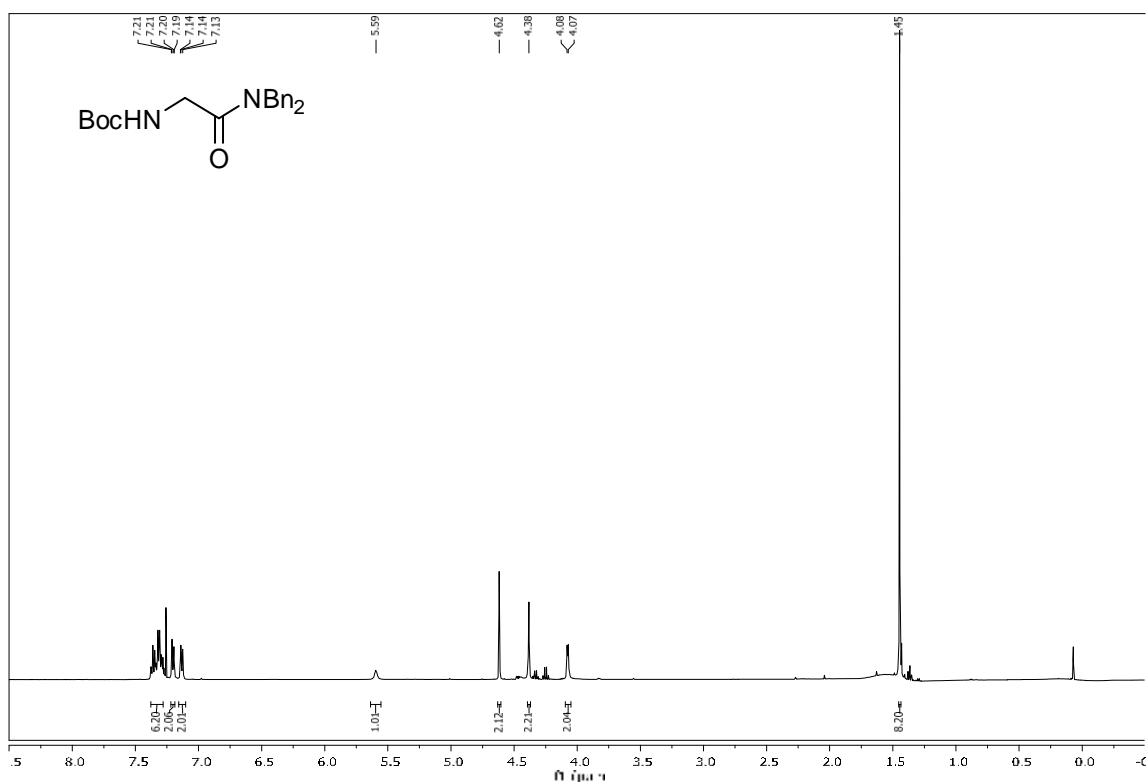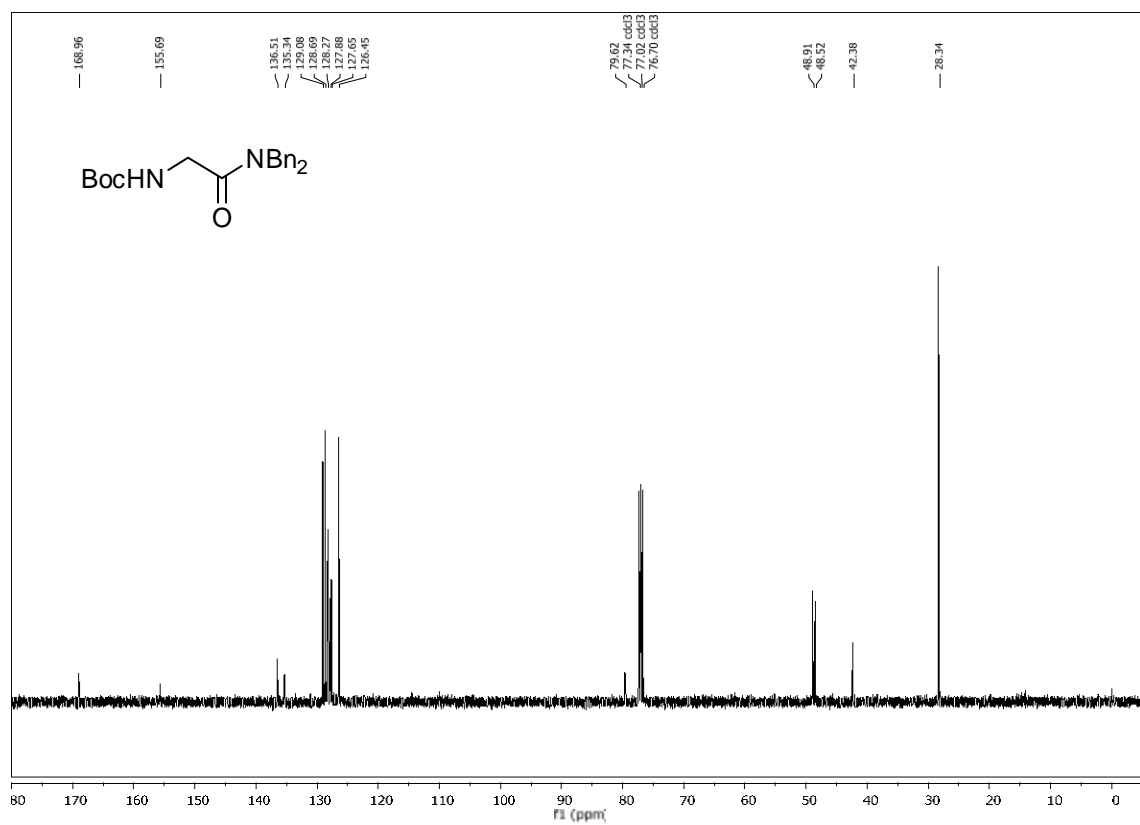

**2-(*tert*-Butoxycarbonylamino)-*N*-benzyl-*N*-methylacetamide (2).**

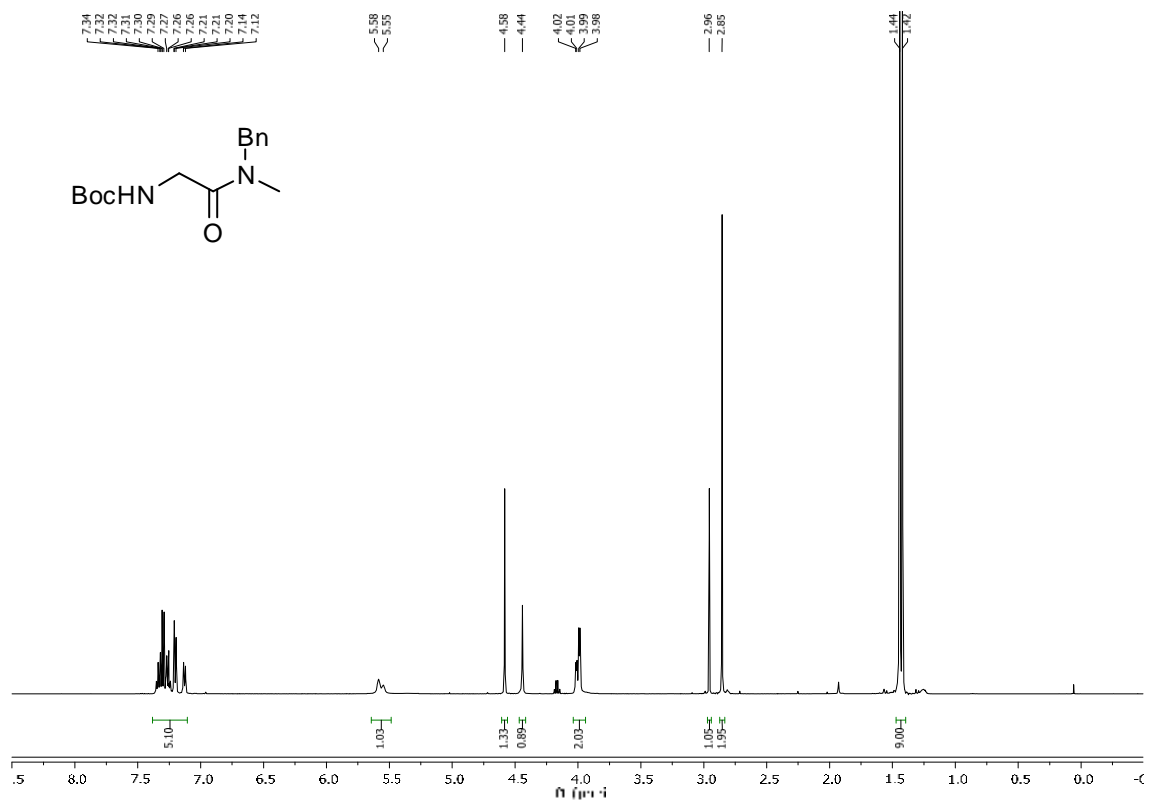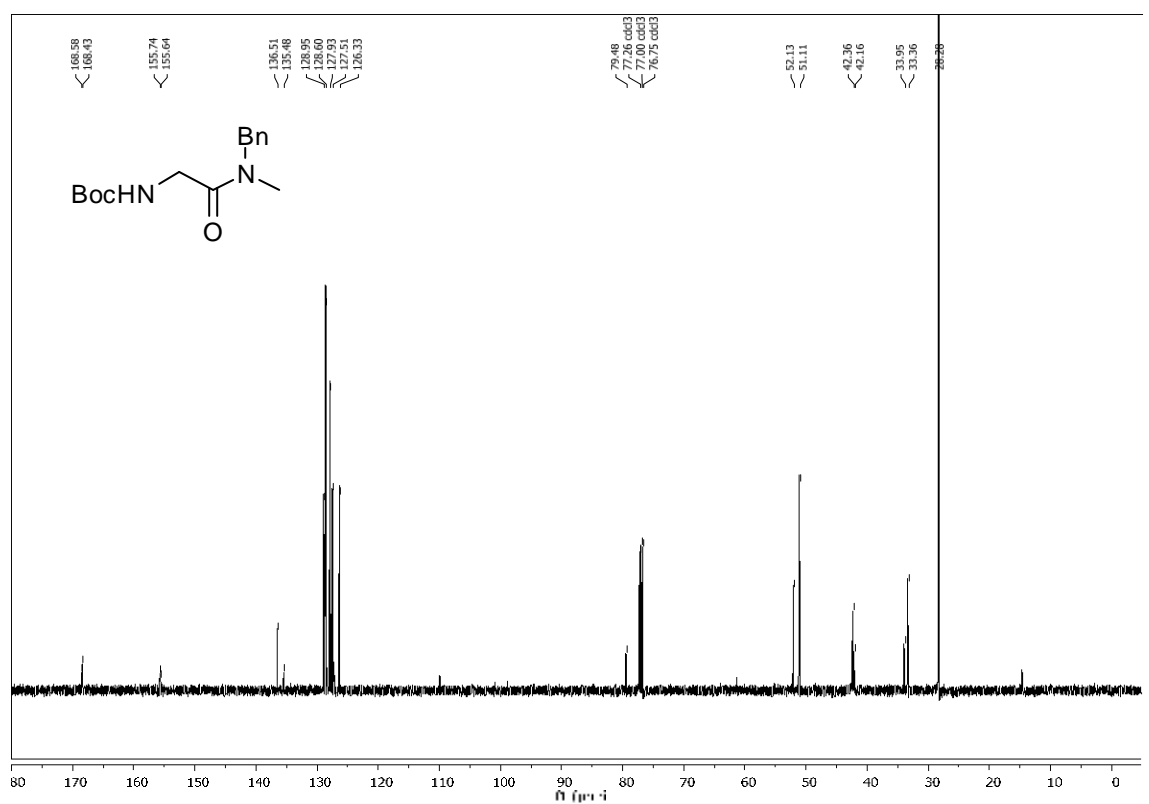

**6-(*tert*-Butoxycarbonylamino)-*N,N*-dibenzylhexanamide (3).**

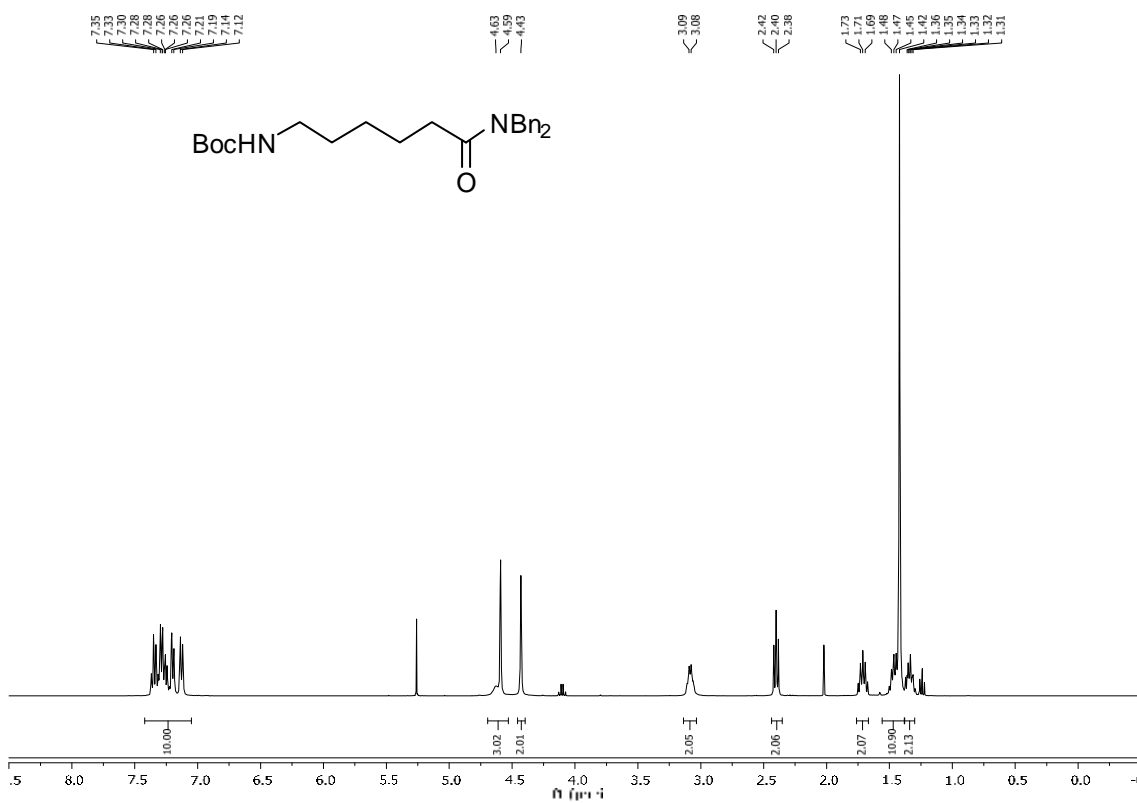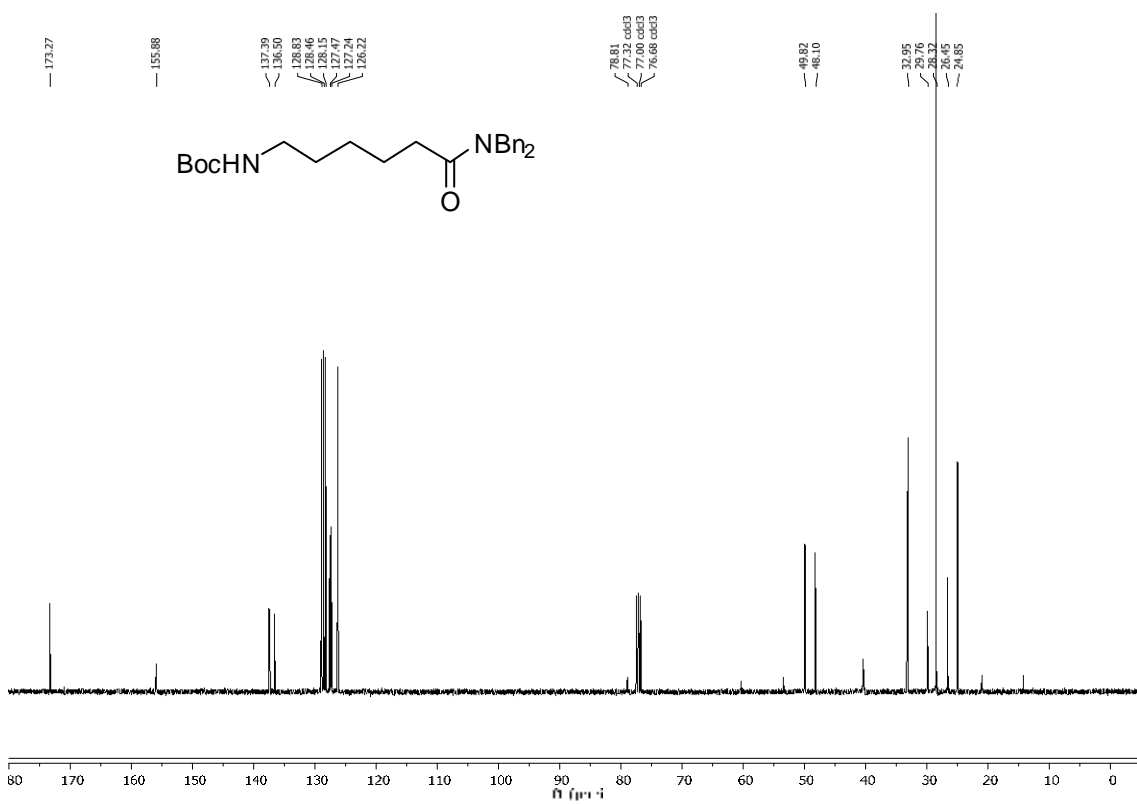



**N<sup>1</sup>,N<sup>1</sup>-dibenzyl-N<sup>2</sup>-methylethane-1,2-diamine (4).**

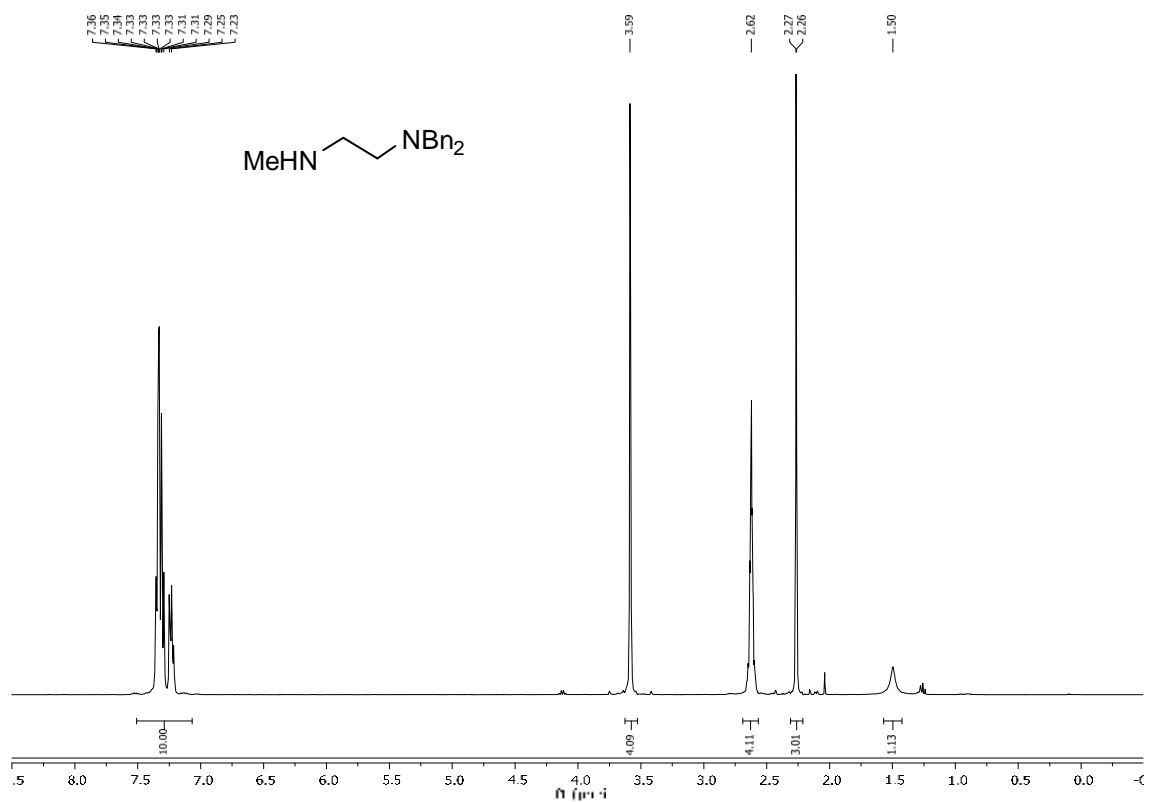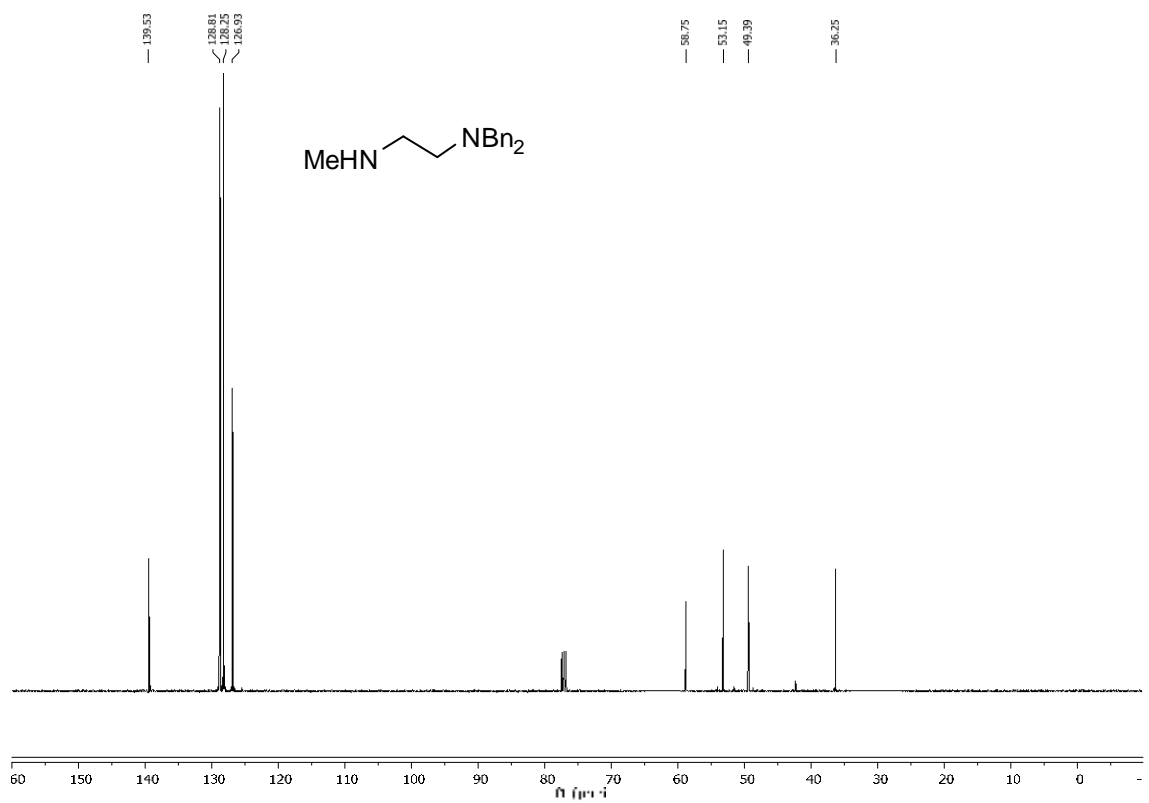

**N<sup>1</sup>-Benzyl-N<sup>1</sup>,N<sup>2</sup>-dimethylethane-1,2-diamine (5).**

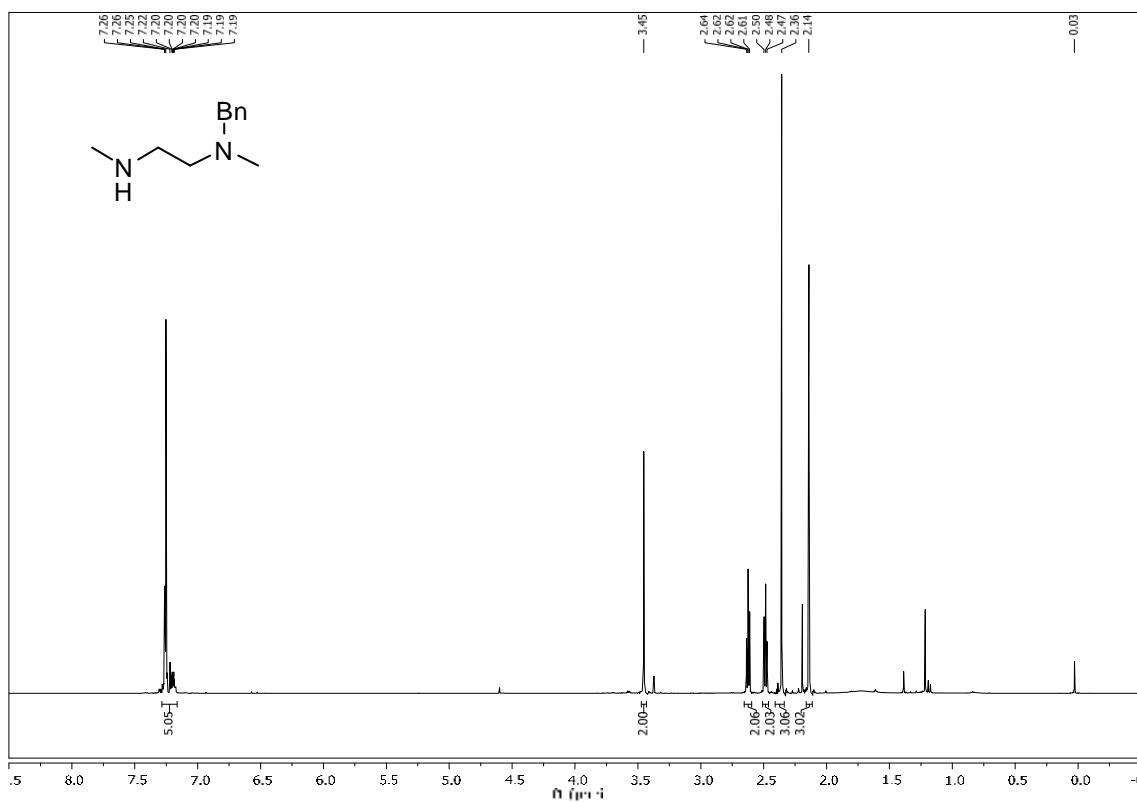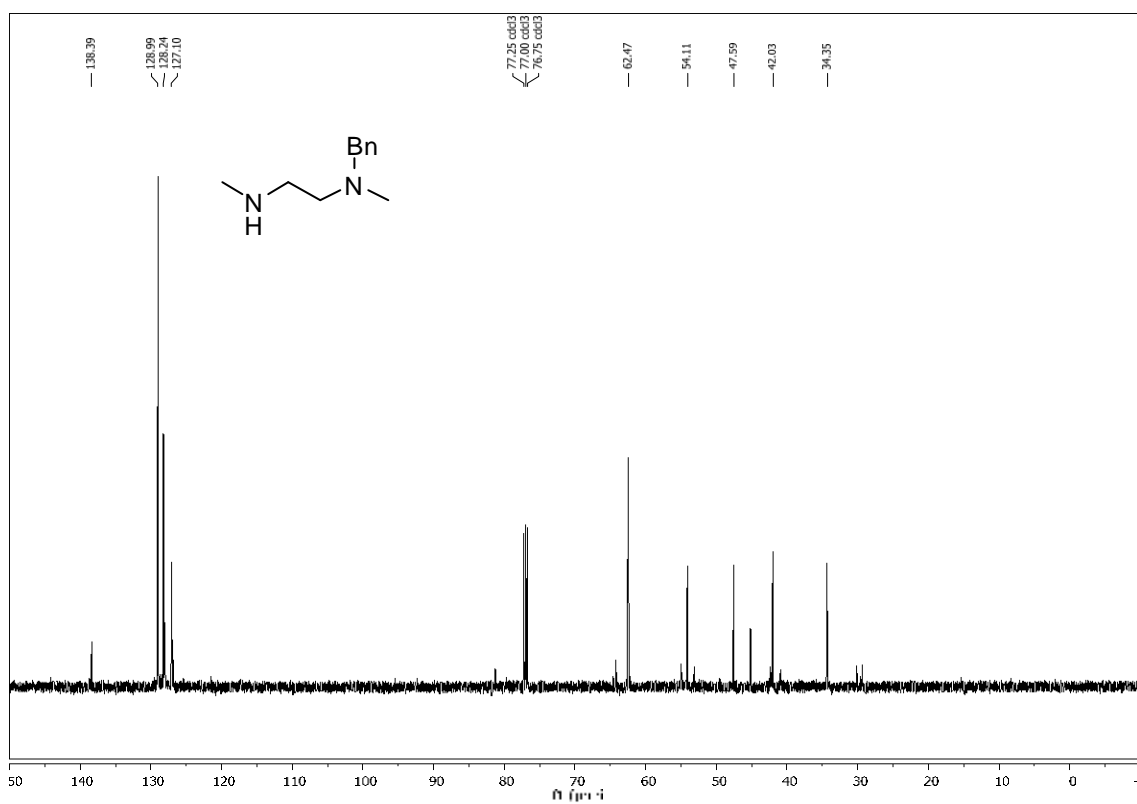



**(S)-Boc-N-(2-(dibenzylamino)ethyl)-N-methylvalinamide (7).**

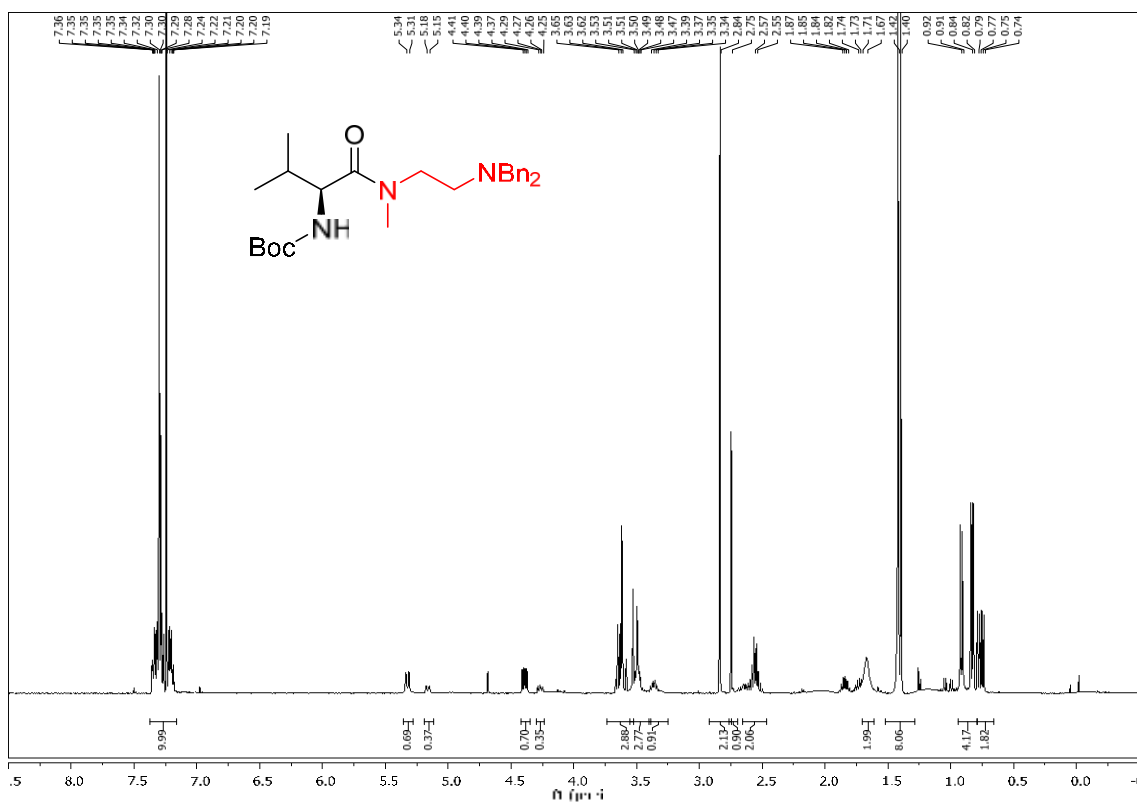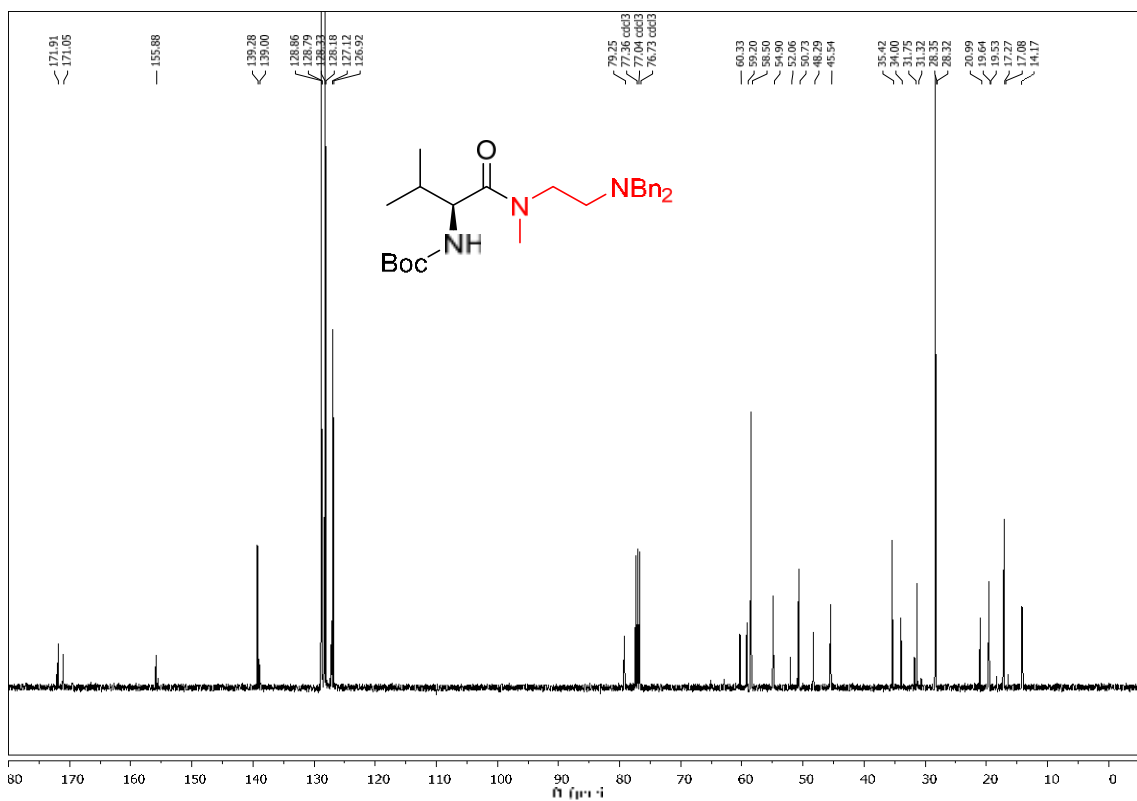

**(S)-Boc-N-(2-(benzyl(methyl)amino)ethyl)-N-methylvalinamide (8).**

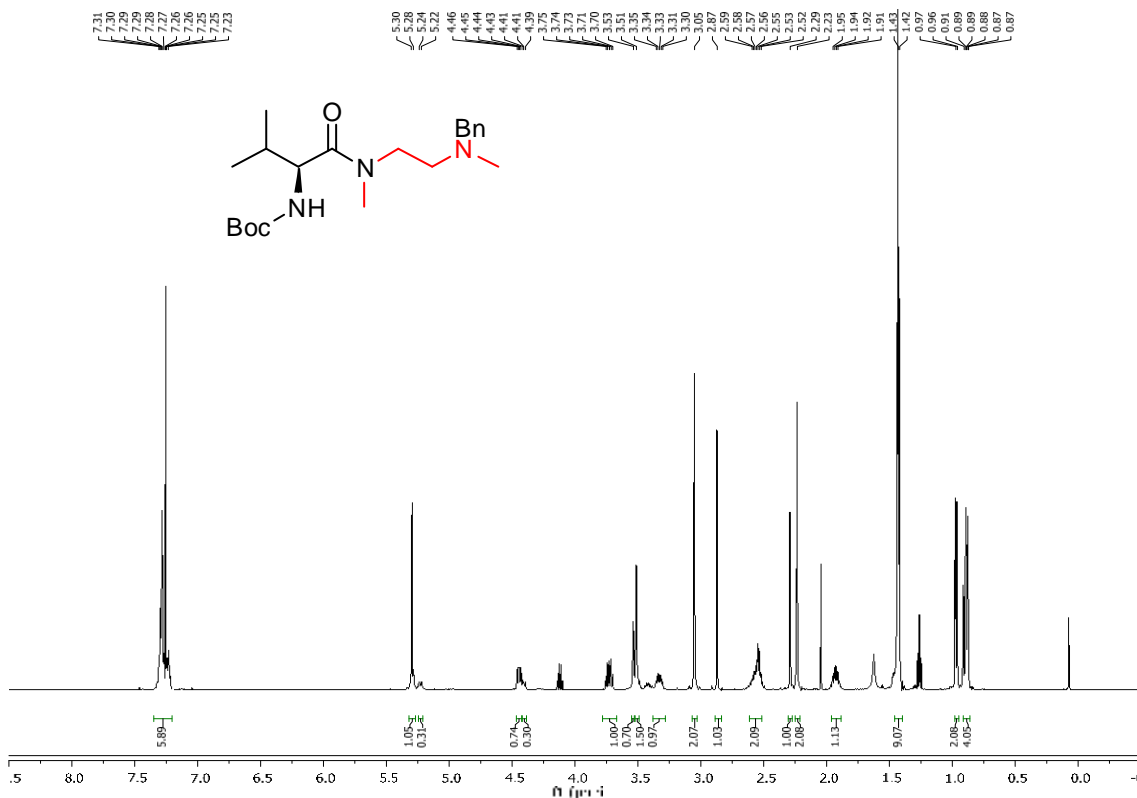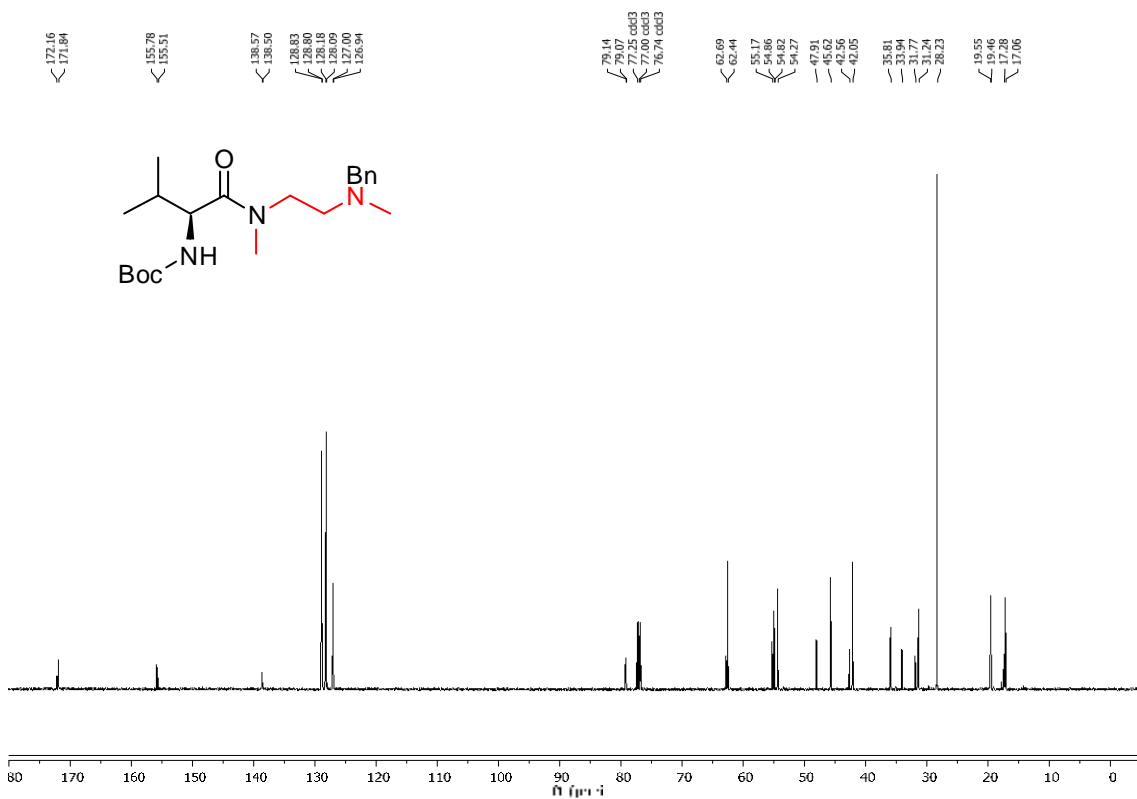

**(S)-Boc-N-(6-(dibenzylamino)hexyl)-N-methylvalinamide (9).**

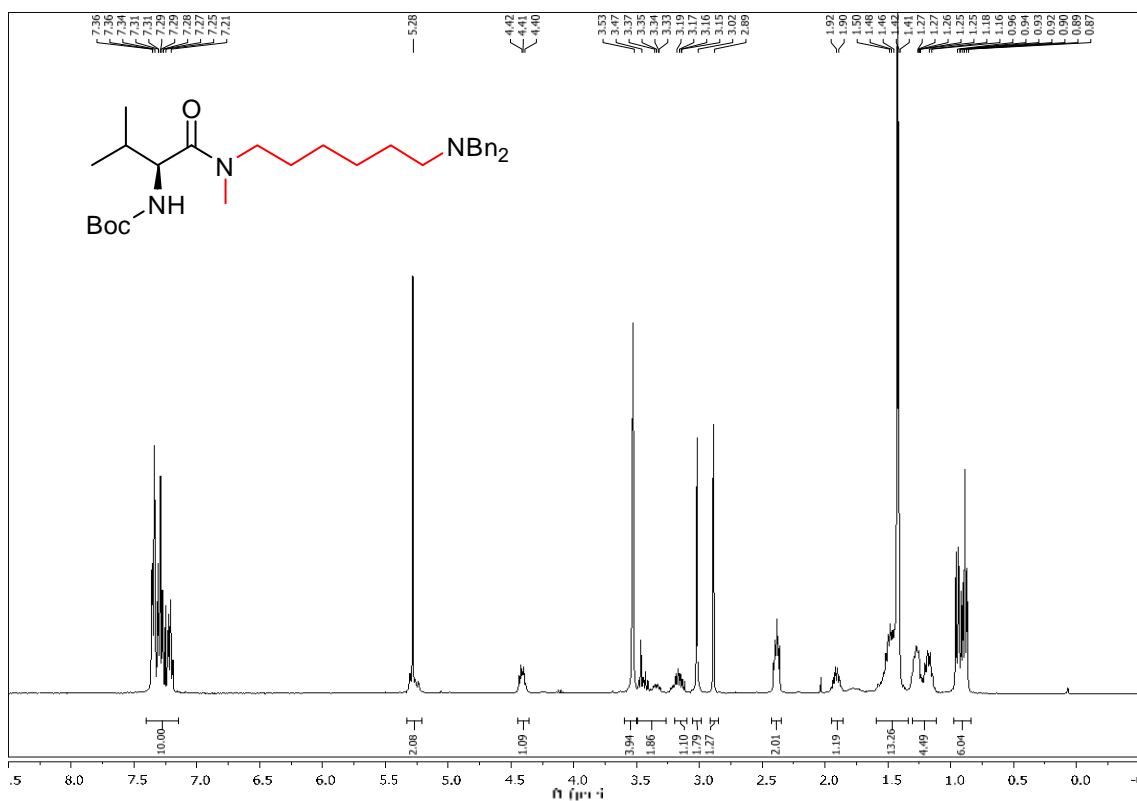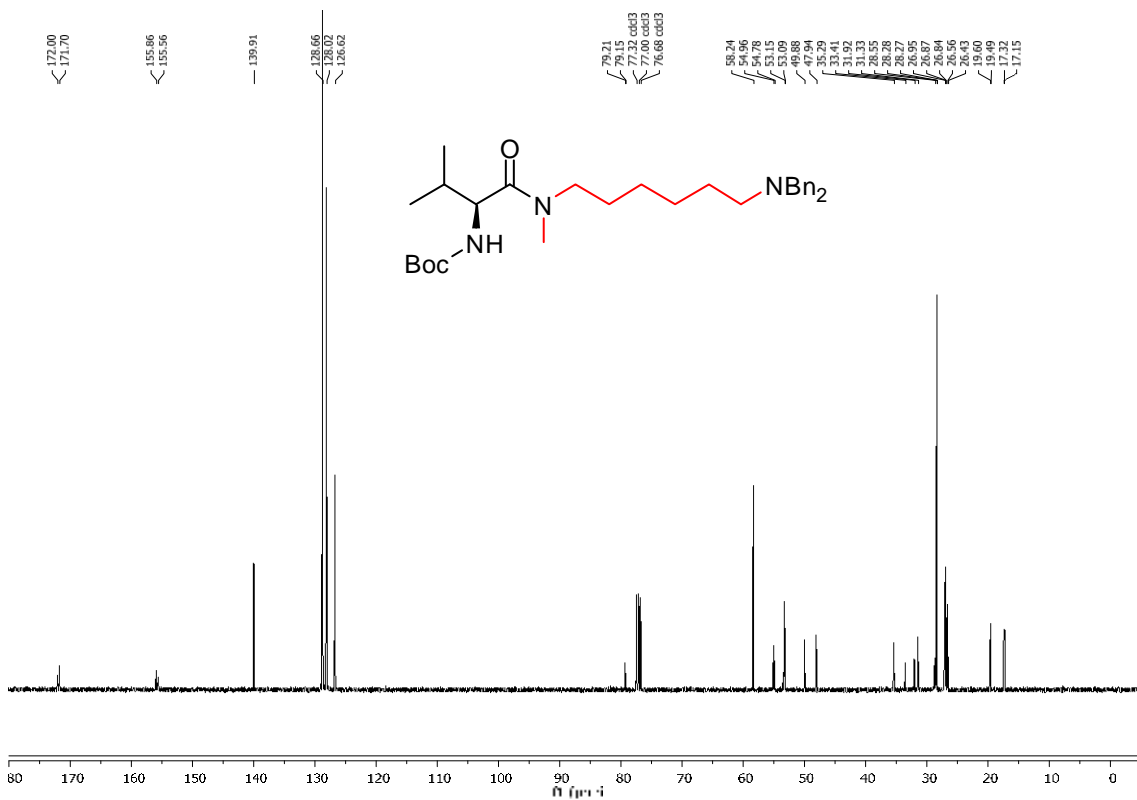



**(S)-tert-Butyl (1-((2-aminoethyl)(methyl)amino)-3-methylbutan-2-yl)carbamate**  
**(11).**

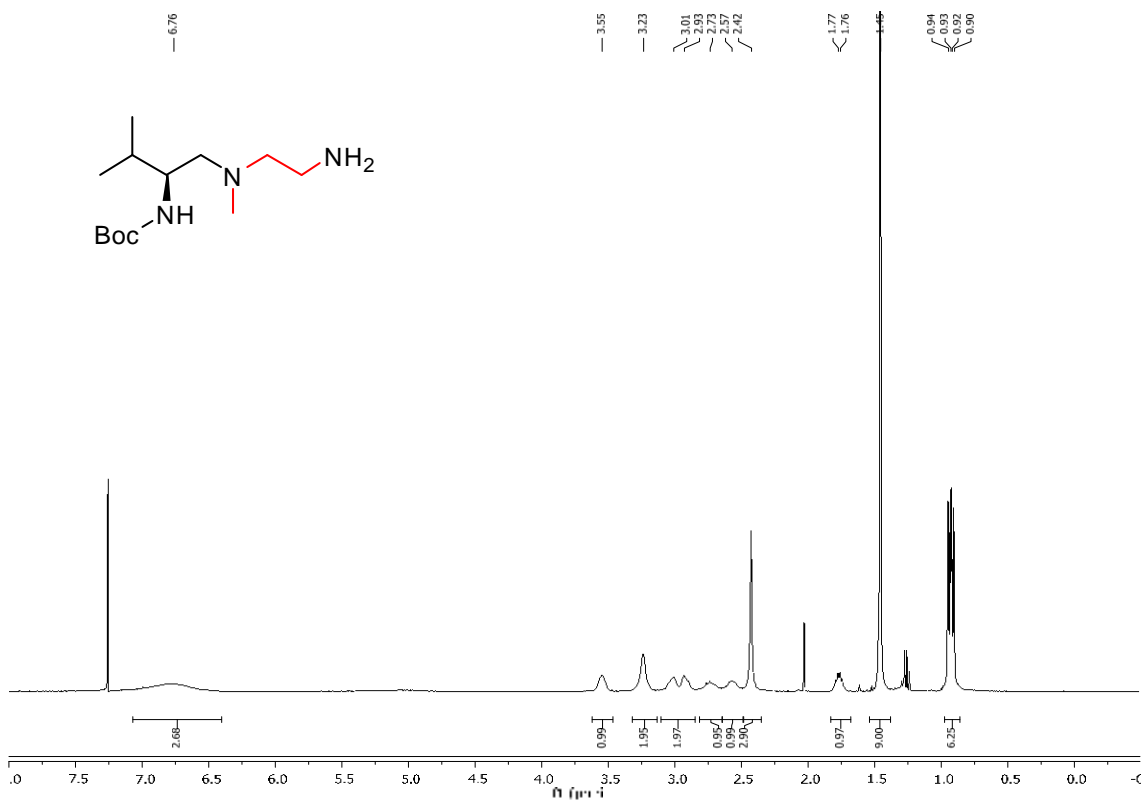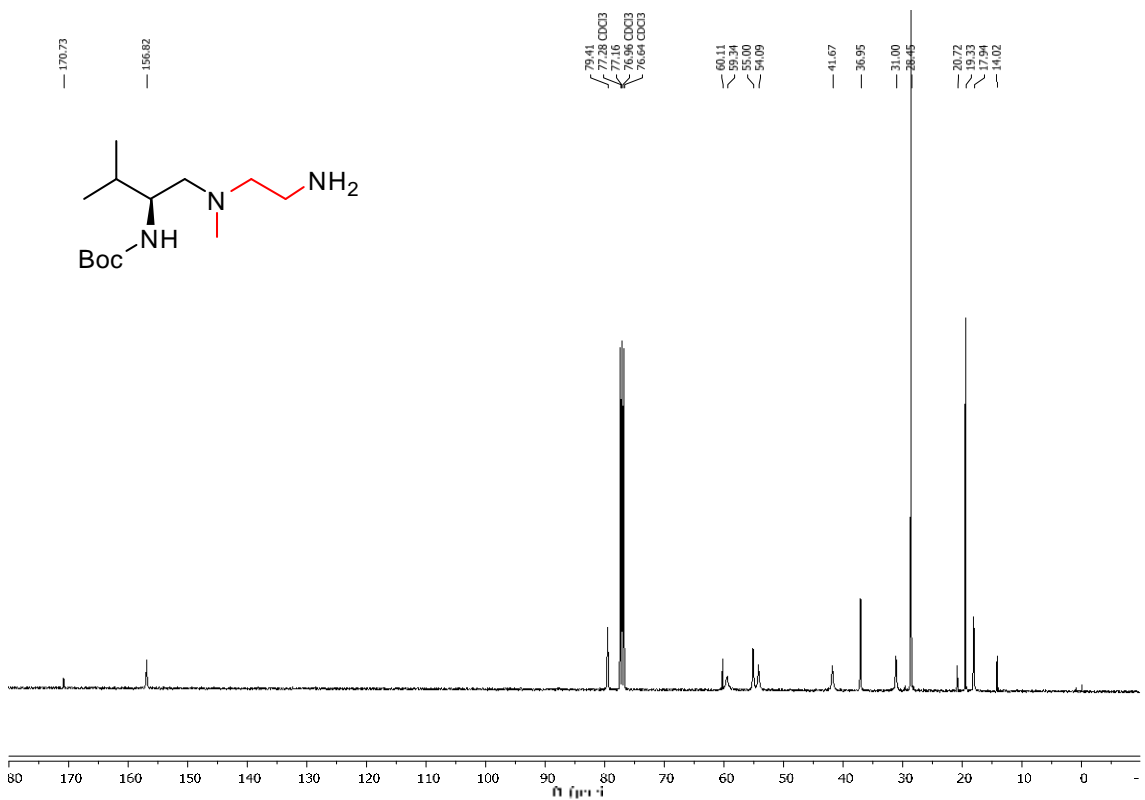



**(S)-tert-Butyl 3-methyl-1-(methyl(2-(methylamino)ethyl)amino)butan-2-yl carbamate (12).**

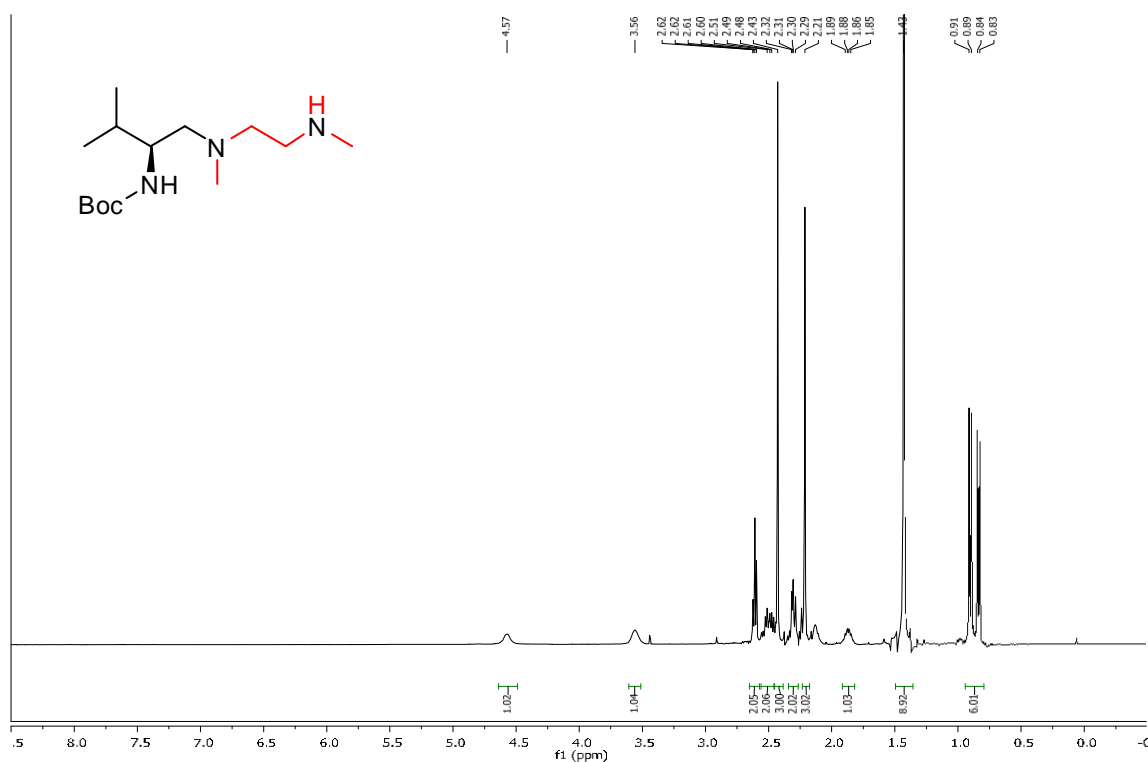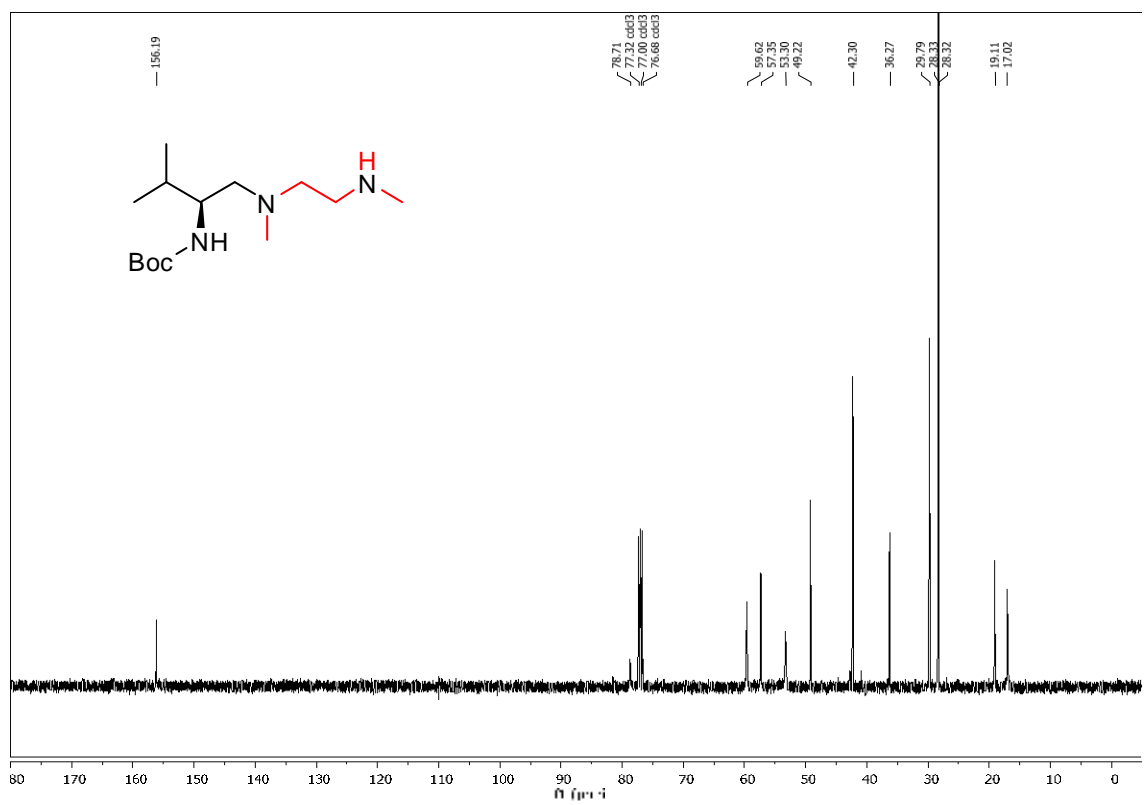

**(S)-tert-Butyl (1-((6-aminohexyl)(methyl)amino)-3-methylbutan-2-yl)carbamate (13).**

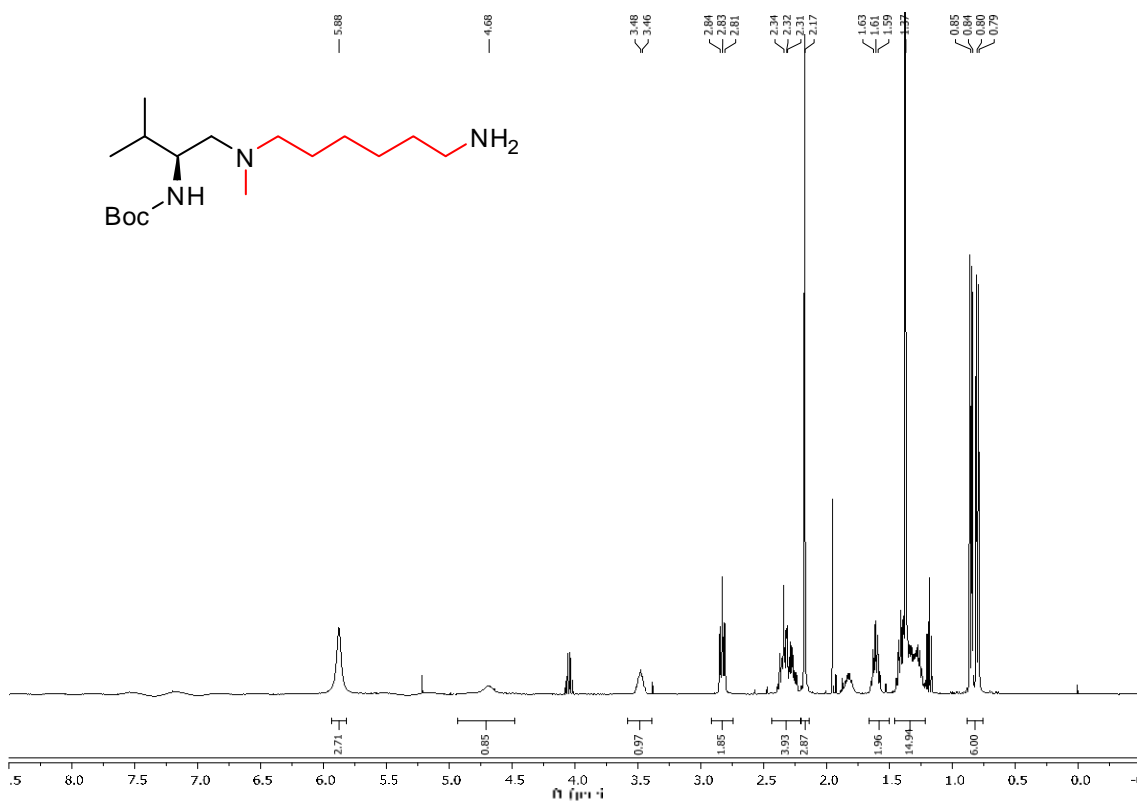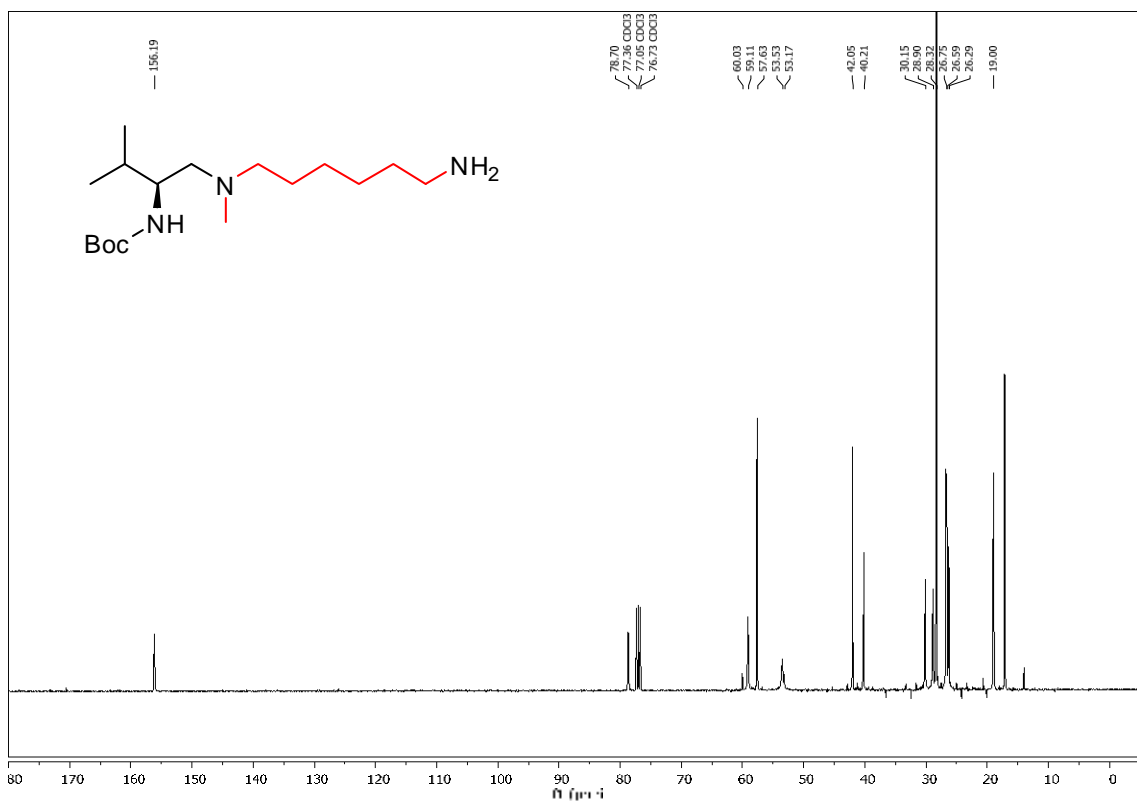

**(S)-tert-Butyl (3-methyl-1-(methyl(6-(methylamino)hexyl)amino)butan-2-yl) carbamate (14).**

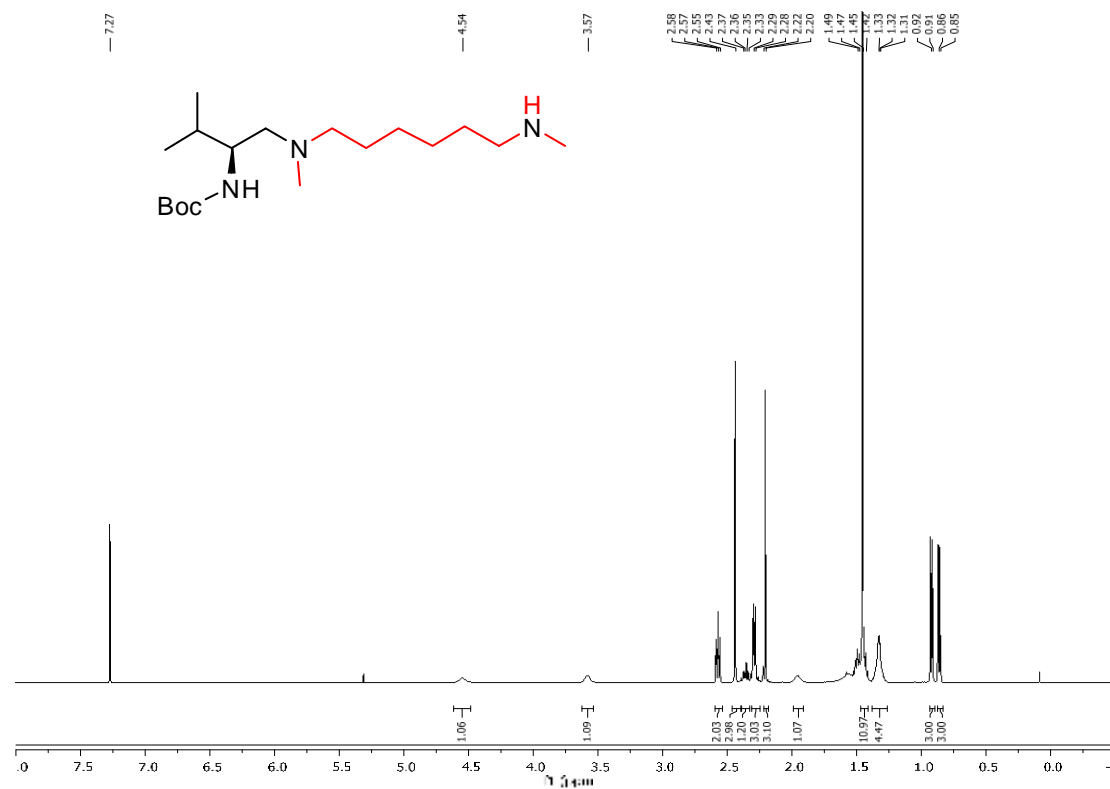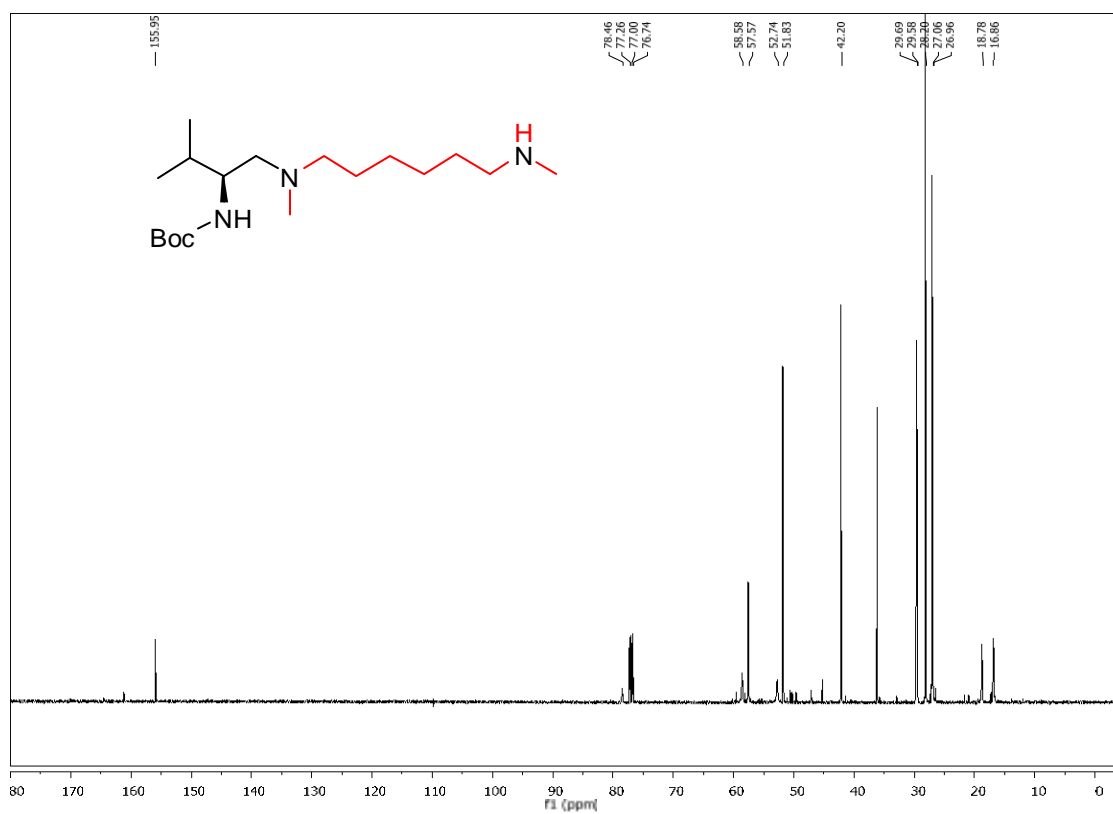

**Resin 15.**

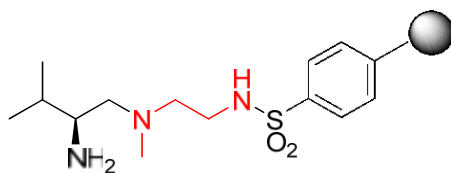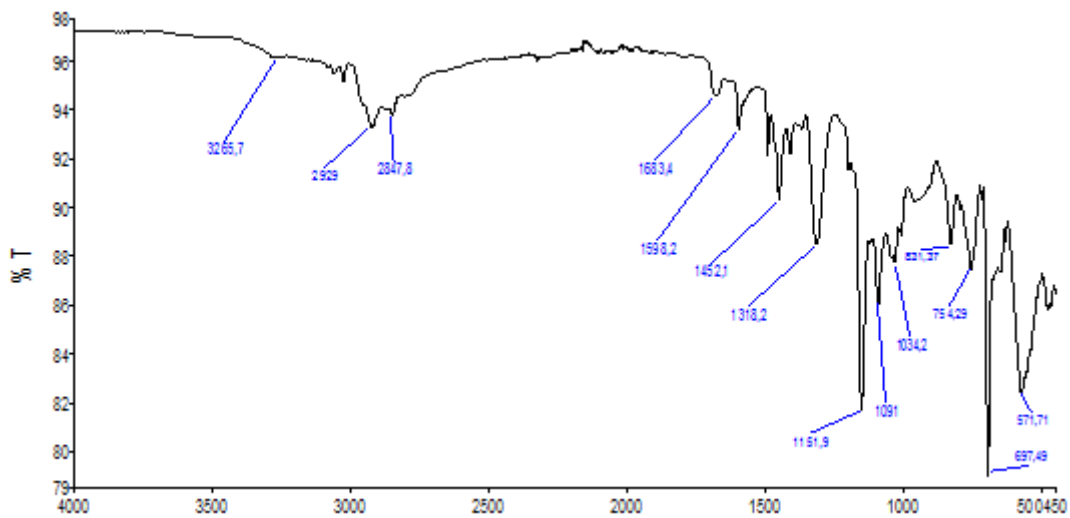

**Resin 16.**

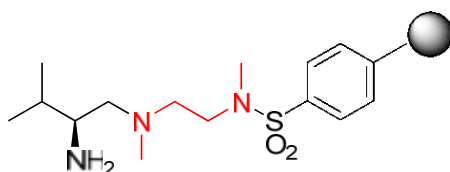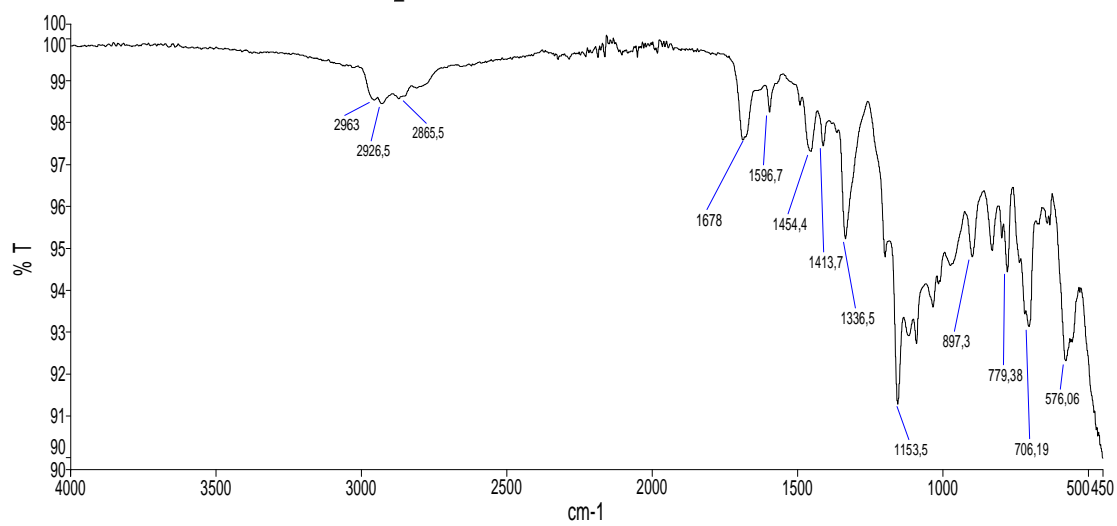

**Resin 17.**

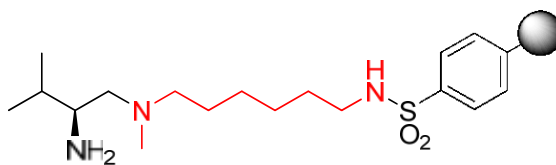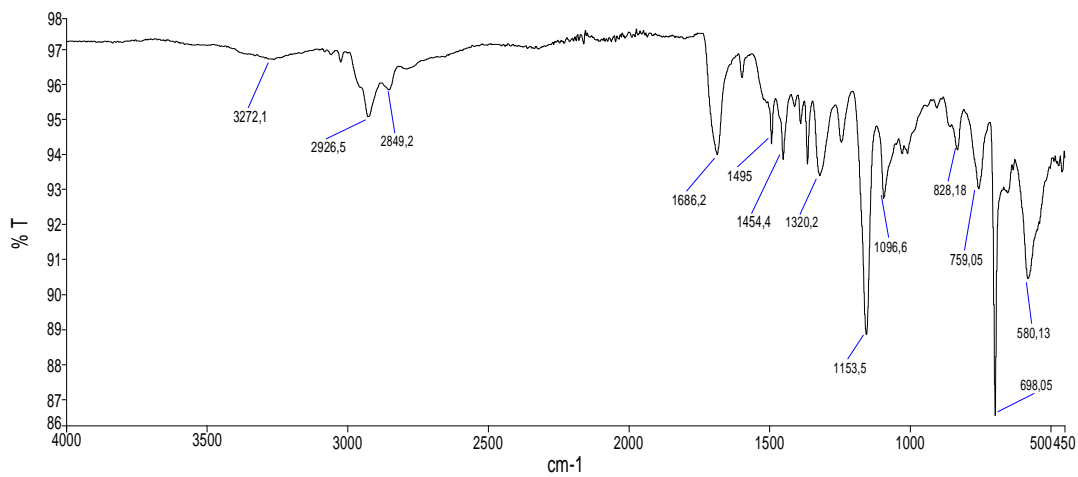

**Resin 18.**

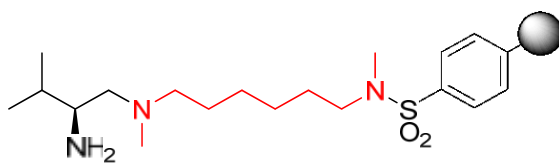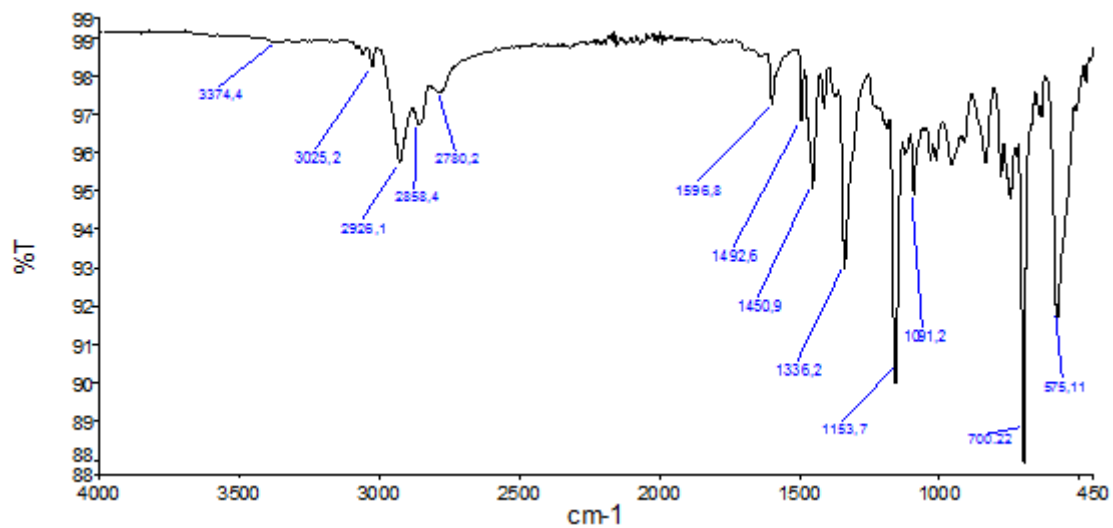

**Resin 19.**

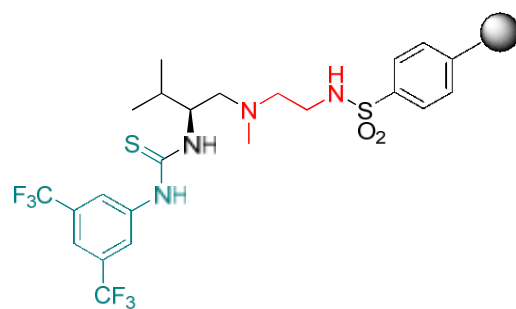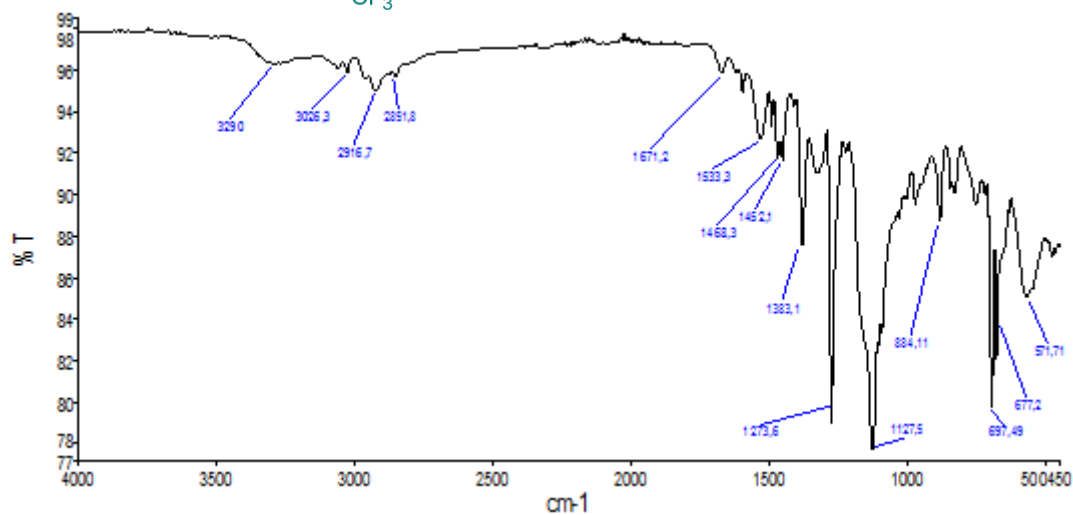

**Resin 20.**

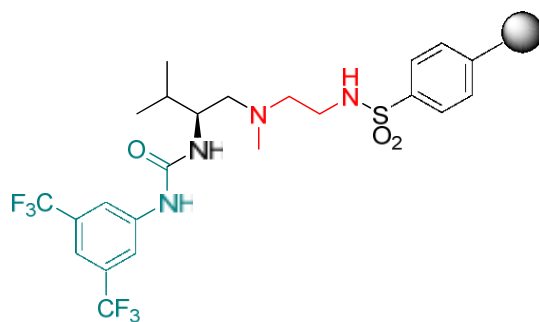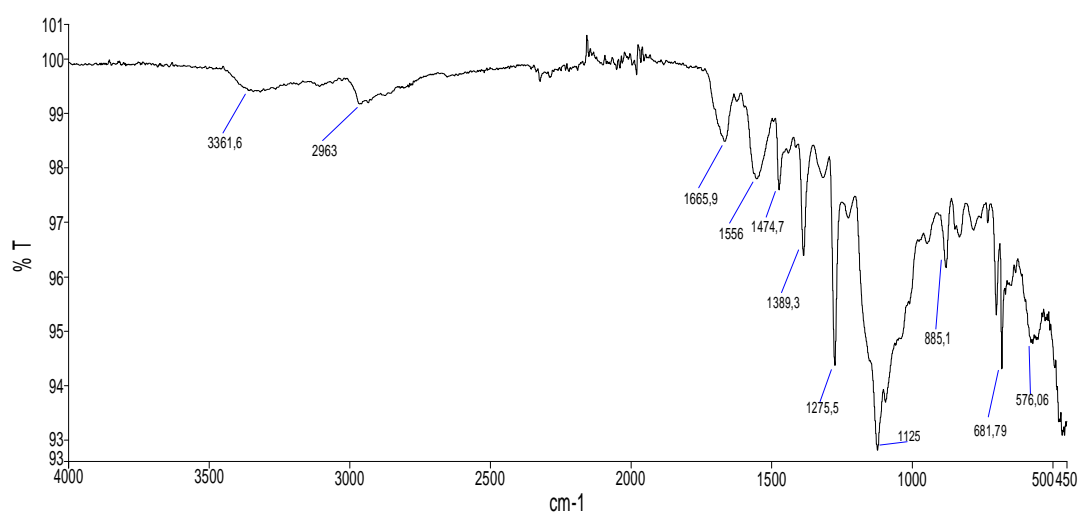

**Resin 21.**

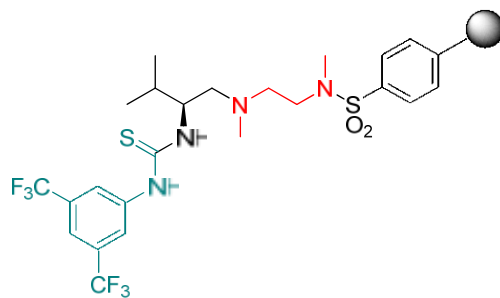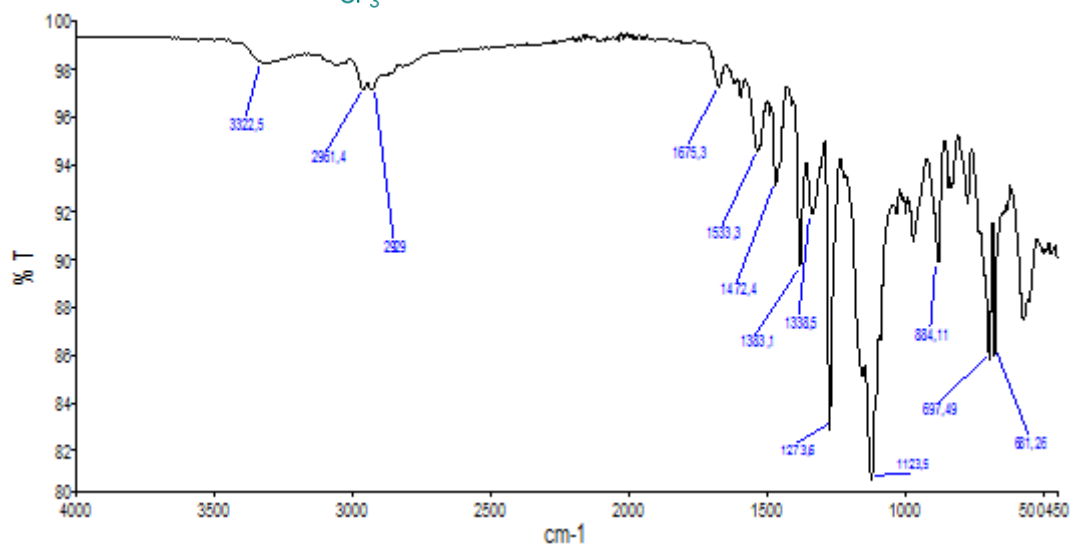

**Resin 22.**

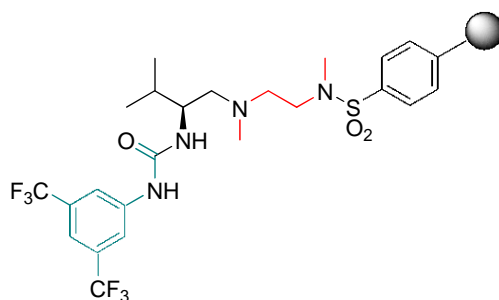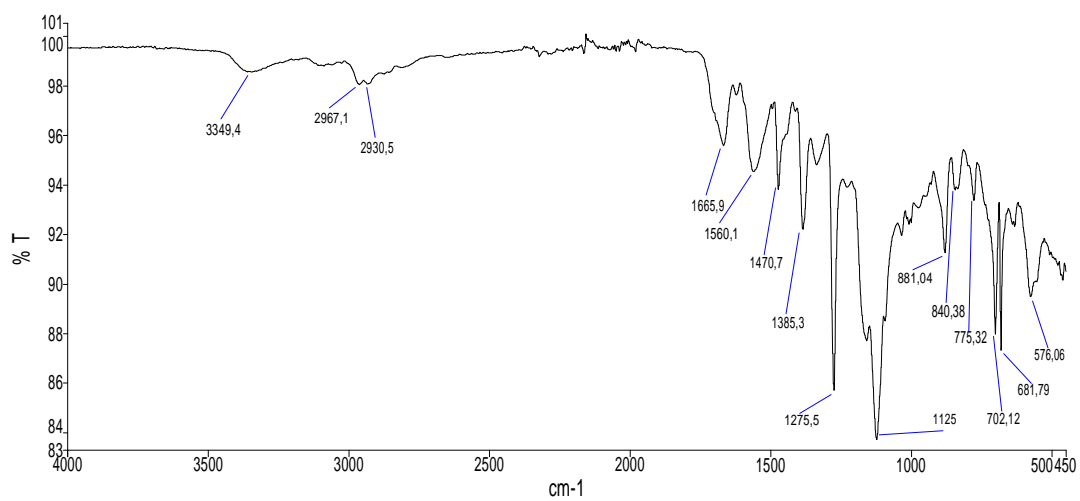

**Resin 23.**

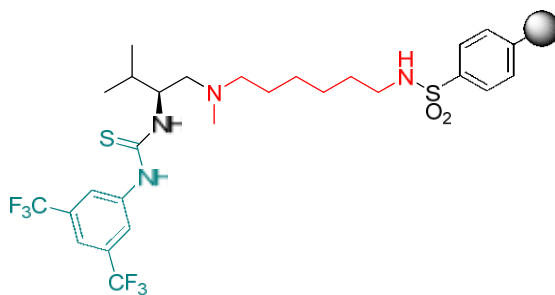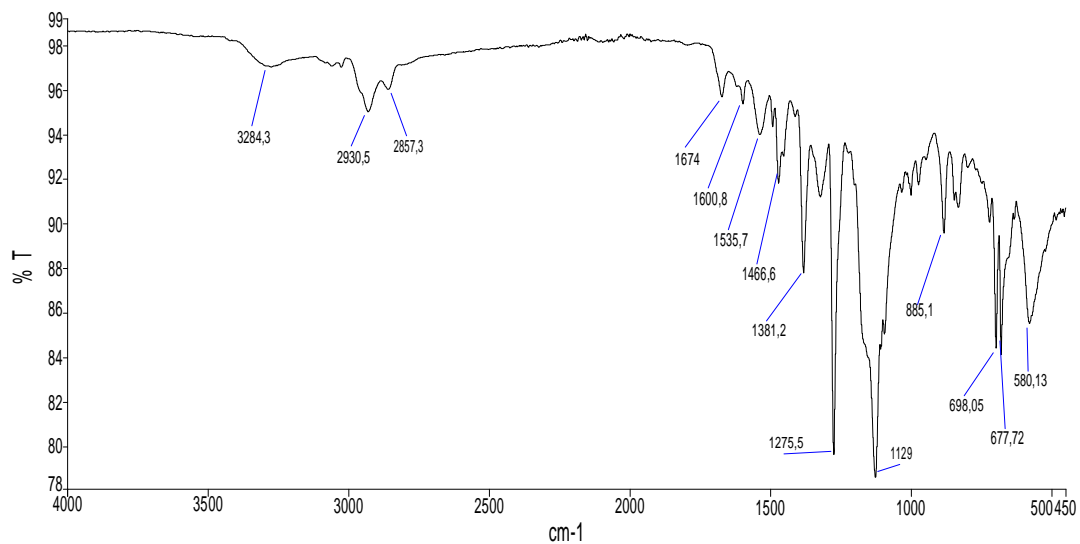

**Resin 24.**

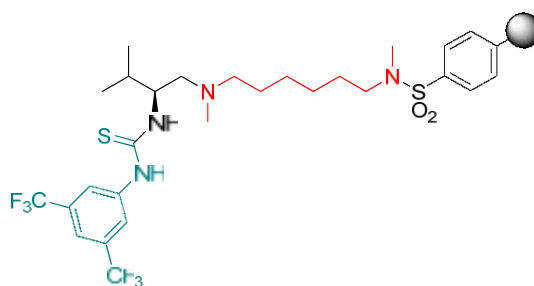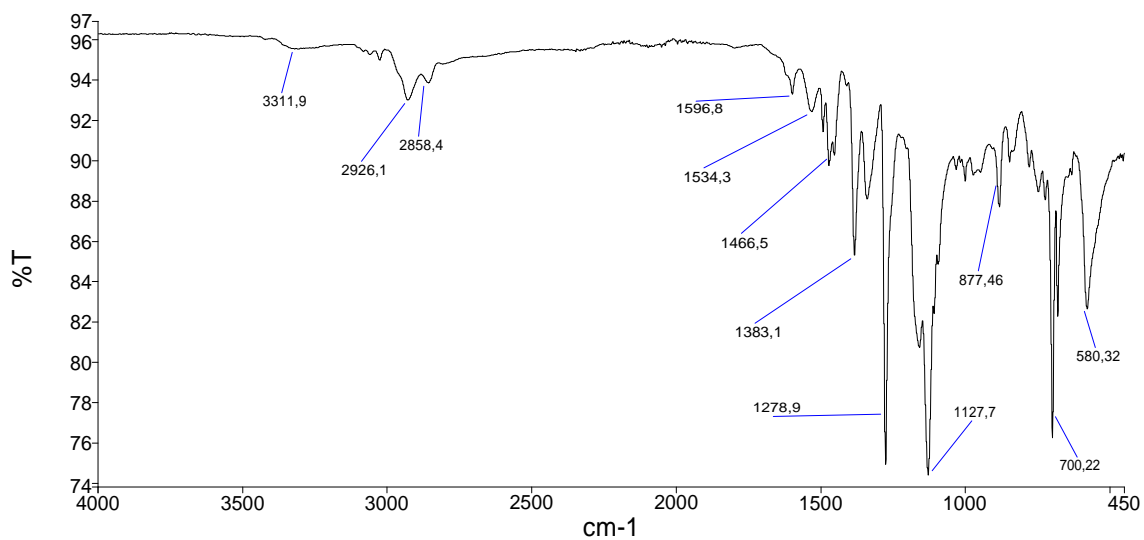

Nombre AC 10  
 Descripción solido blanco



**(S)-tert-Butyl 1-((6-(N,4-dimethylphenylsulfonamido)hexyl)(methyl)amino)-3-methylbutan-2-ylcarbamate (25).**

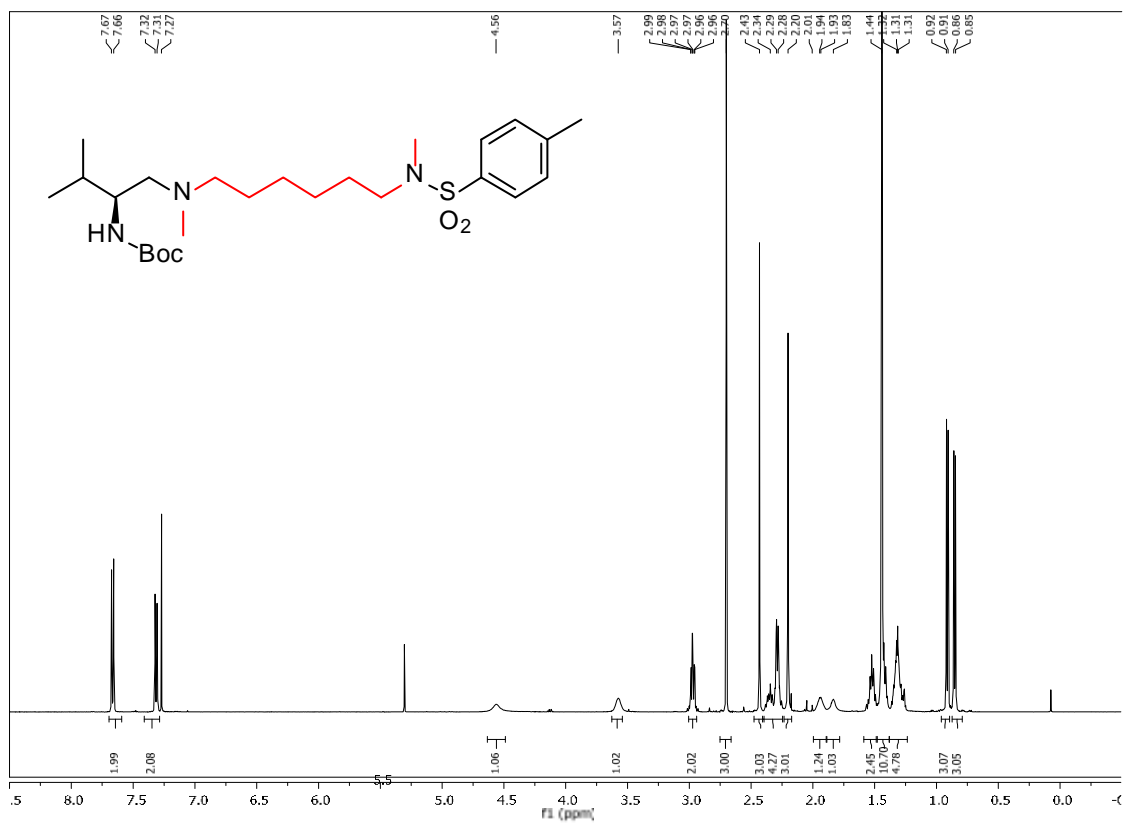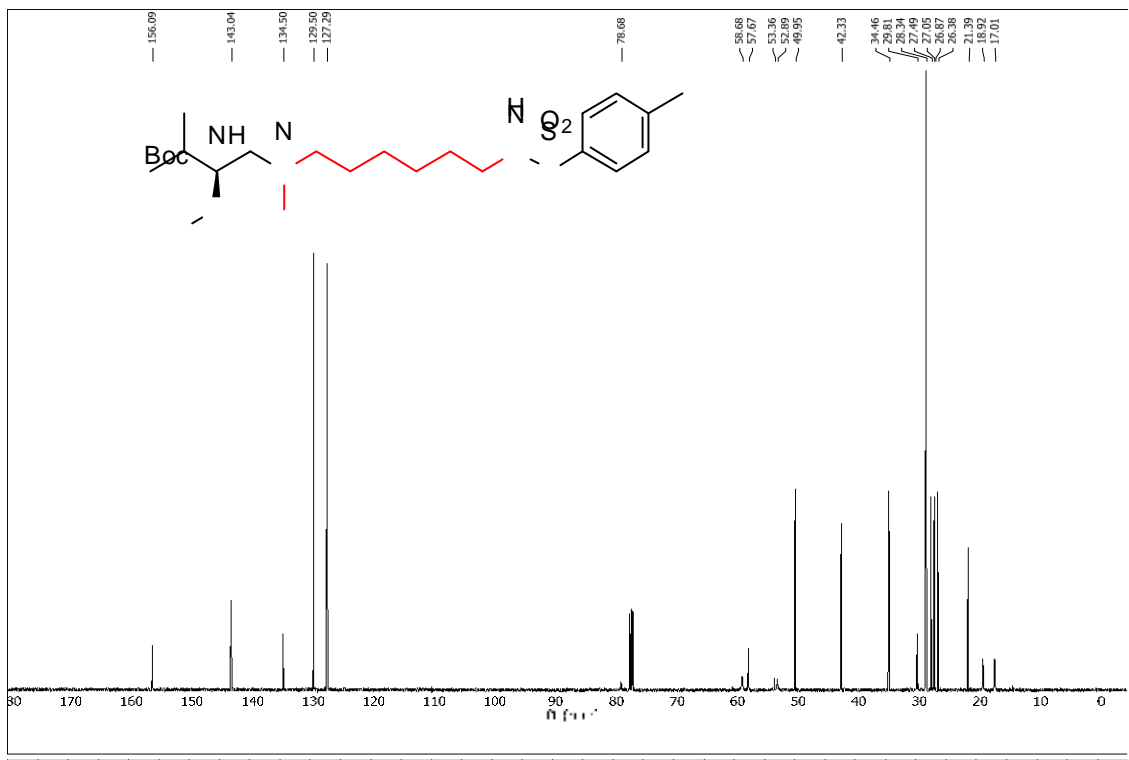

**(S)-N-(6-((2-(3-(3,5-Bis(trifluoromethyl)phenyl)thioureido)-3-methylbutyl)(methyl)amino)hexyl)-N,4-dimethylbenzenesulfonamide (26).**

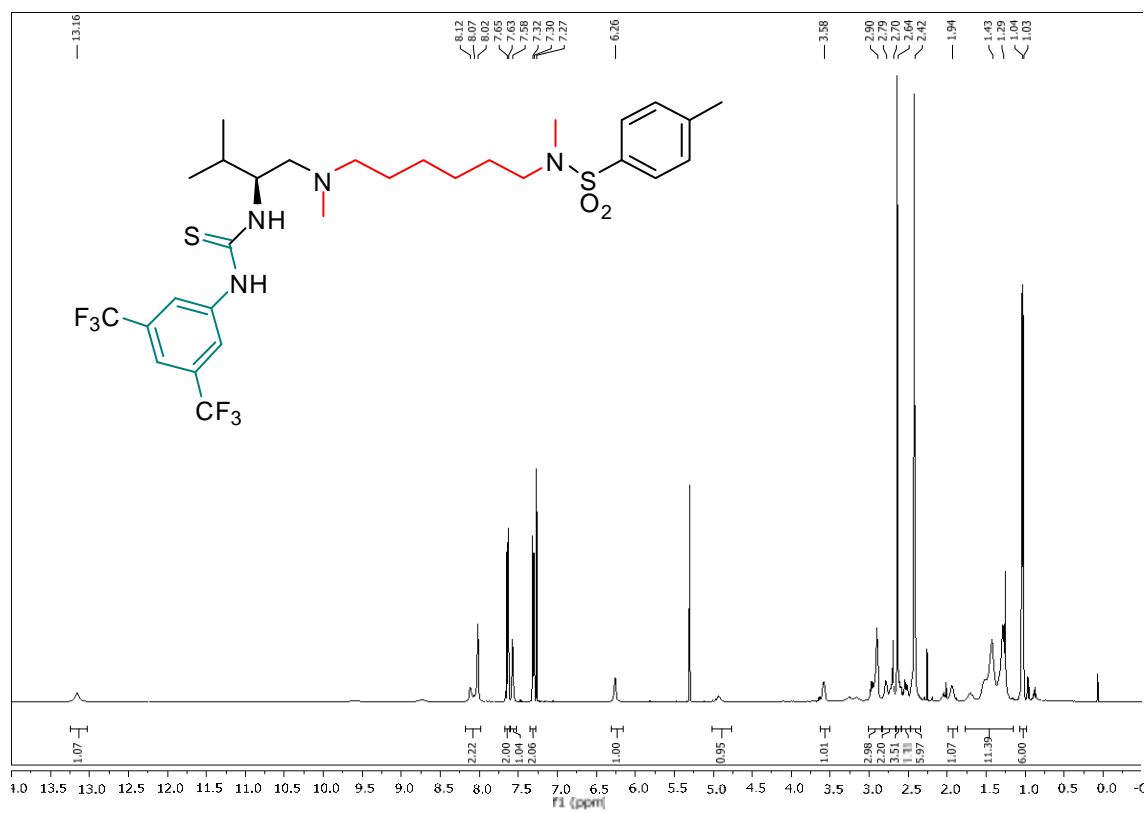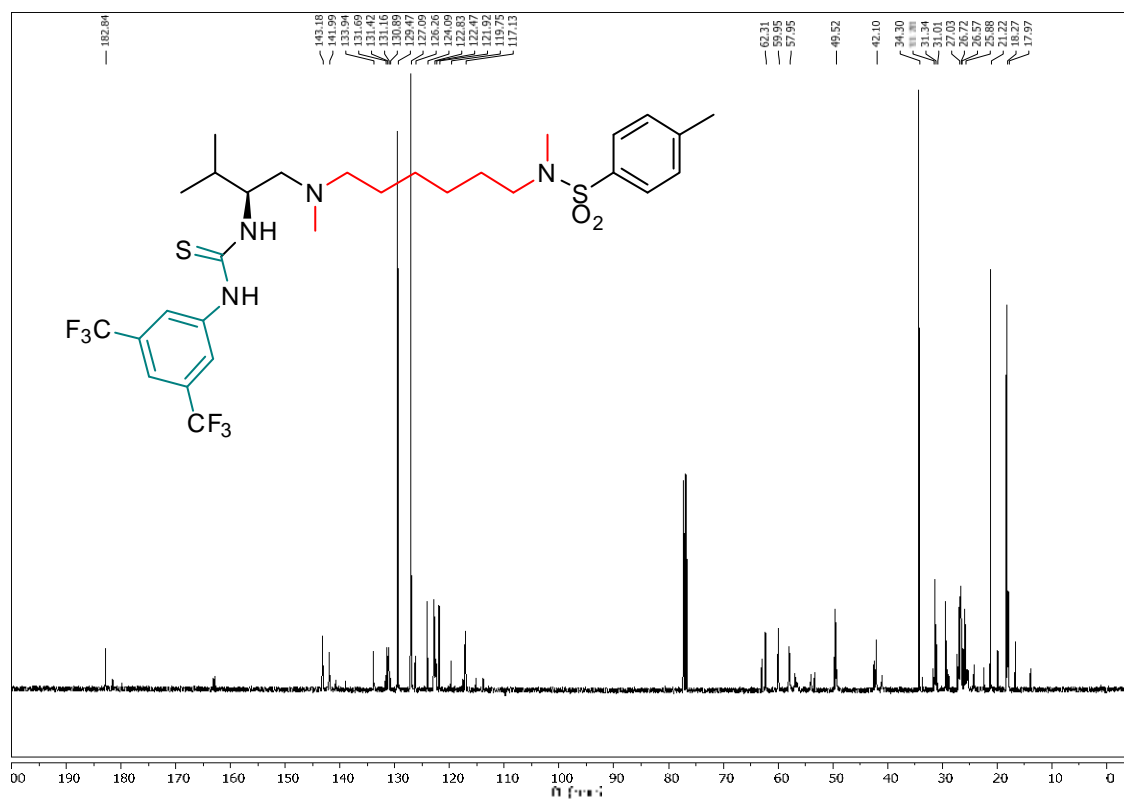

### 3. NMR Spectra for Aza-Henry reaction products.

#### *tert*-Butyl (S)-(1-phenyl) 2-nitroethylcarbamate (30a).

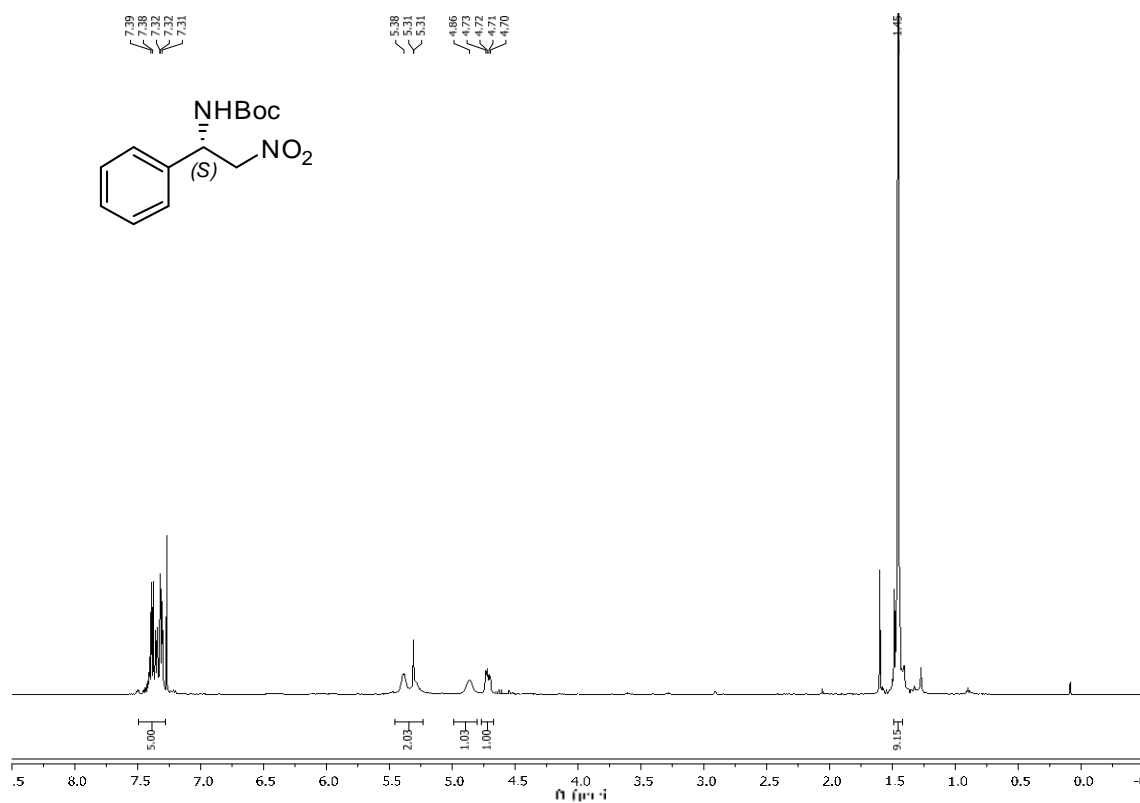

#### *tert*-Butyl (S)-1-(4-nitrophenyl)-2-nitroethylcarbamate (30b).

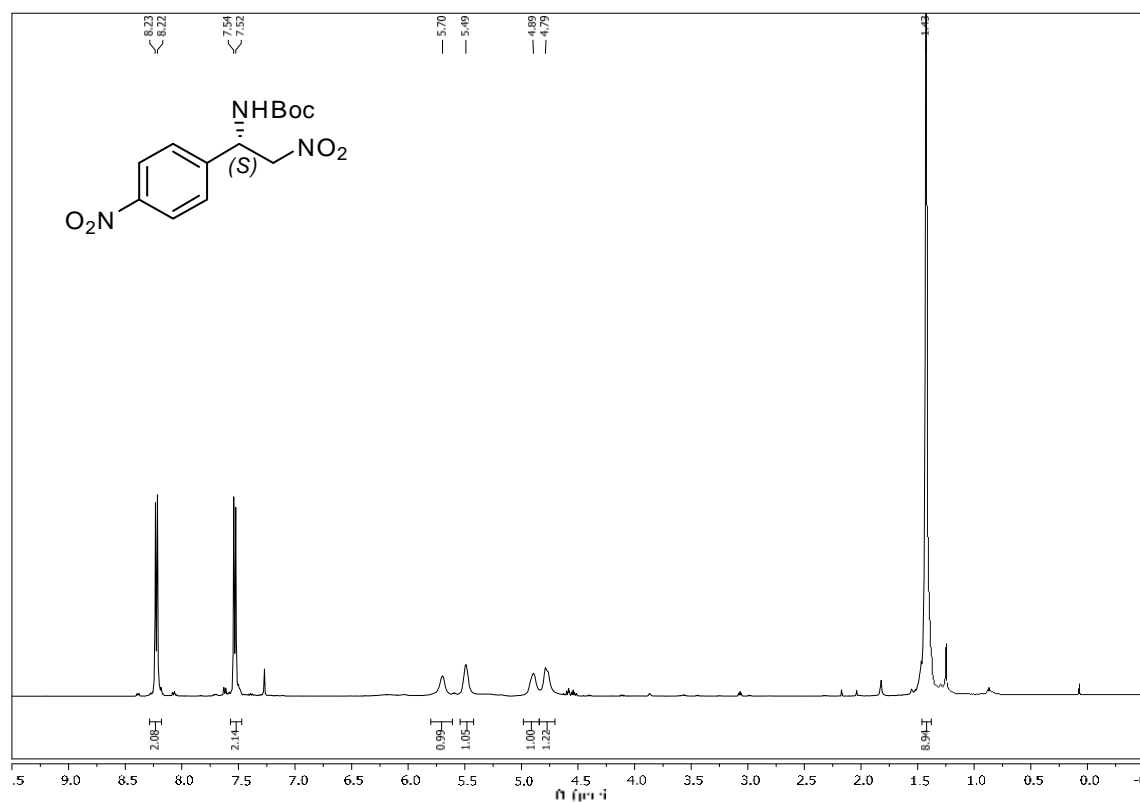

***tert*-Butyl (*S*)-1-(4-chlorophenyl)-2-nitroethylcarbamate (30c).**

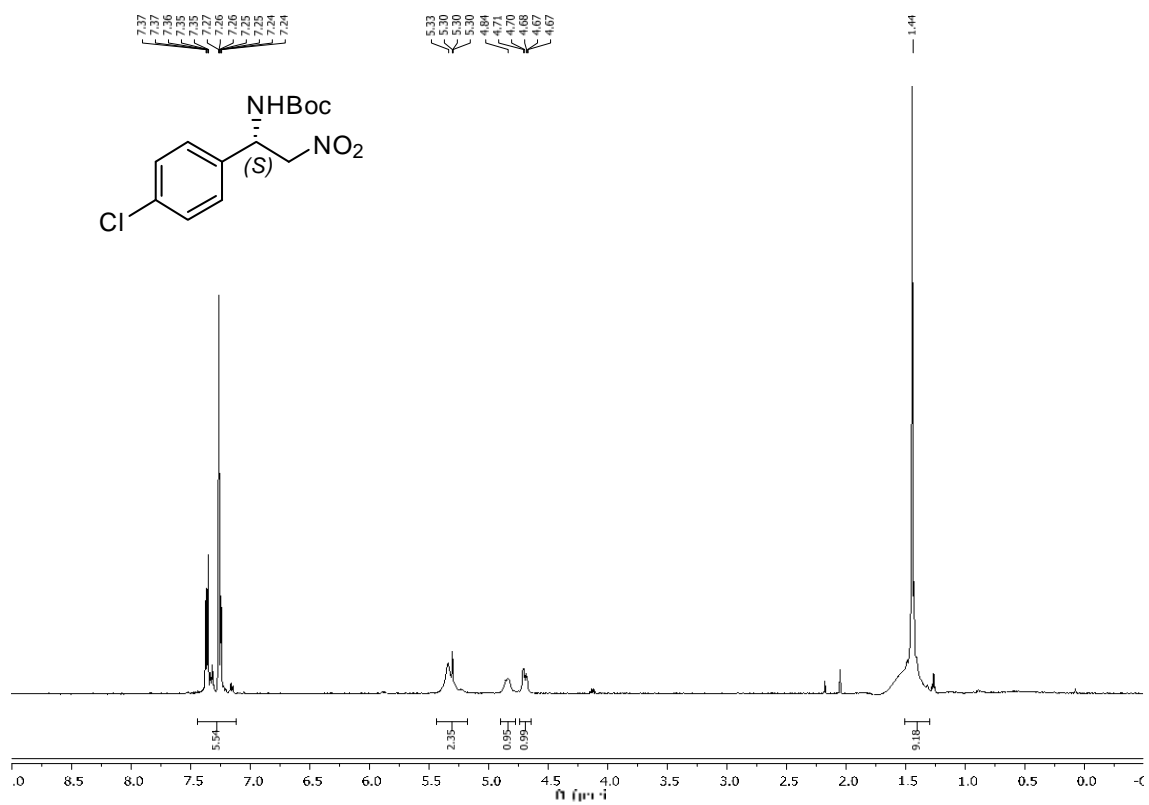

**(*S*)-*tert*-Butyl-1-(2-chlorophenyl)-2-nitroethylcarbamate (30d).**

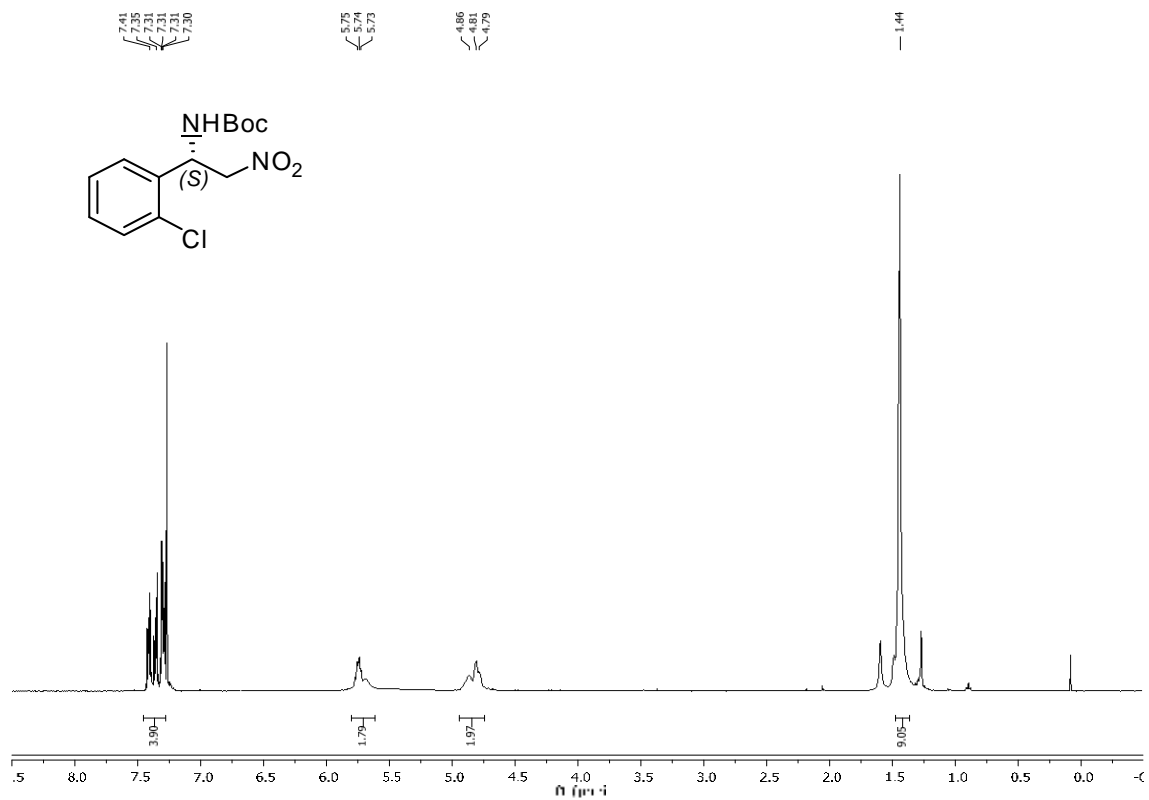

***tert*-Butyl (*S*)-1-(3-chlorophenyl)-2-nitroethylcarbamate (30e).**

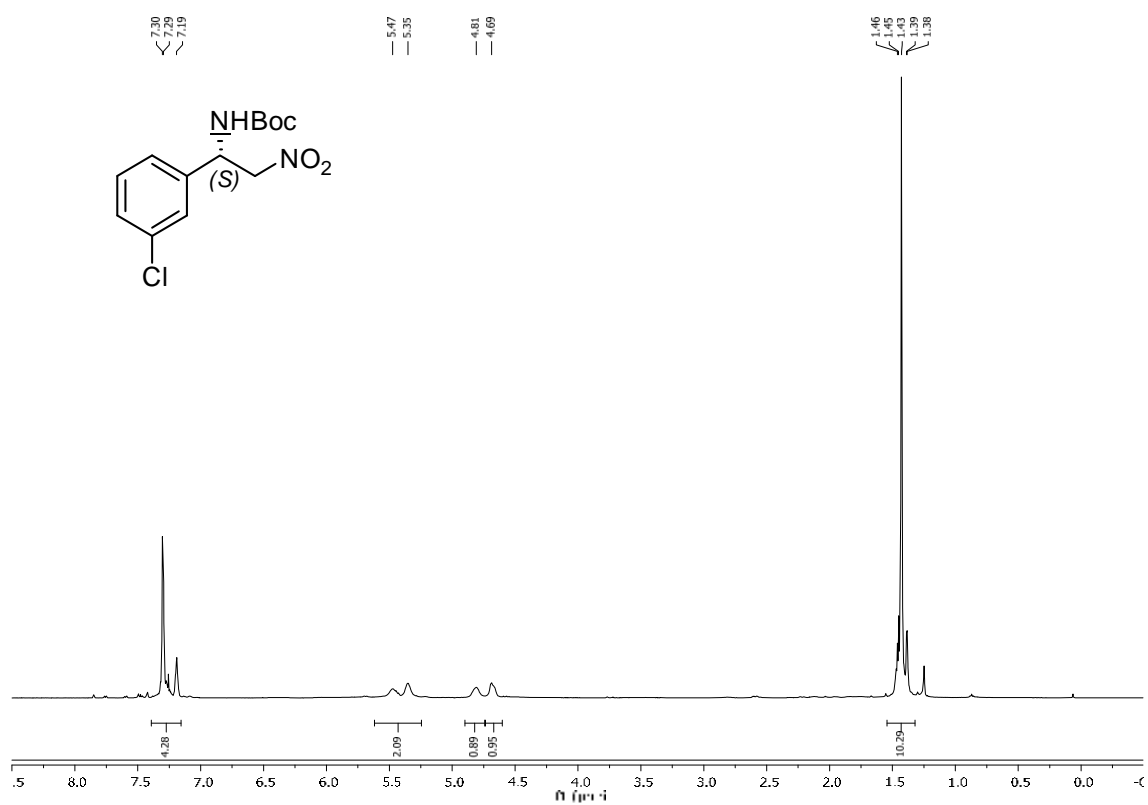

***tert*-Butyl (*S*)-1-(4-trifluoromethylphenyl)-2-nitroethylcarbamate (30f).**

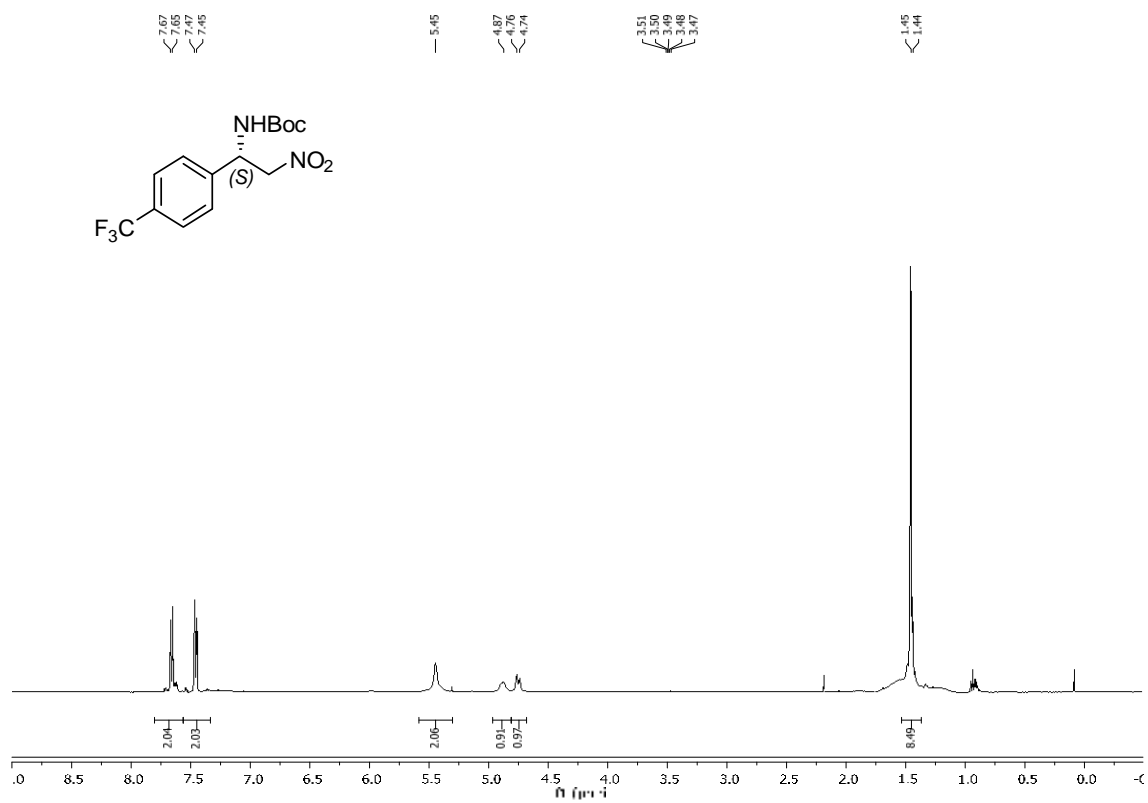

***tert*-Butyl (S)-1-(4-methoxyphenyl)-2-nitroethylcarbamate (30g).**

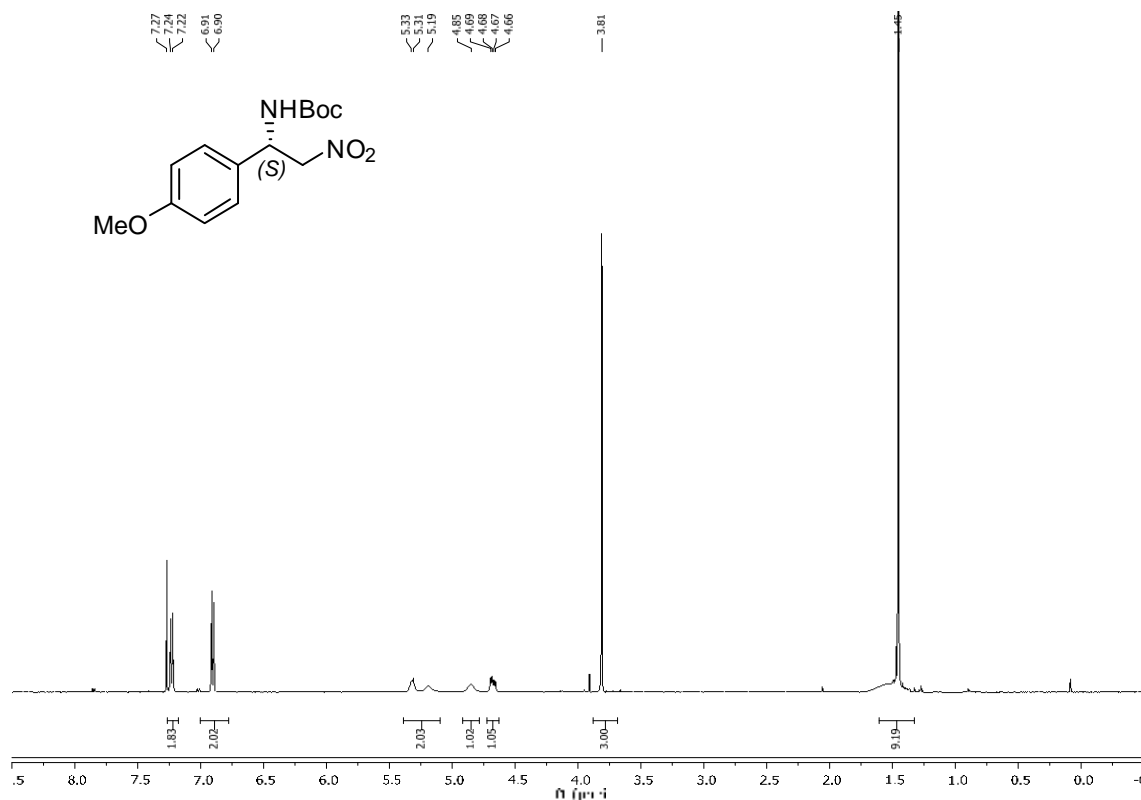

***tert*-Butyl (S)-1-(p-tolyl)-2-nitroethylcarbamate (30h).**

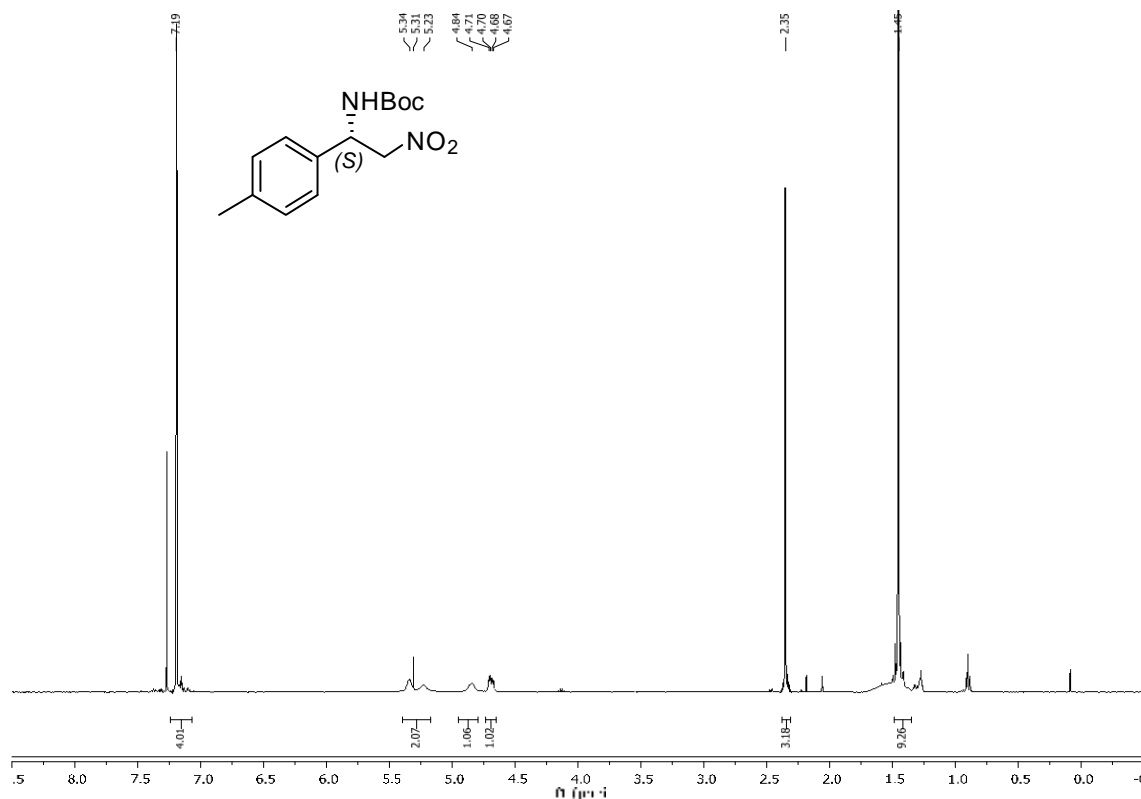



**(S)-tert-Butyl 1-(furan-2-yl)-2-nitroethylcarbamate (30k).**

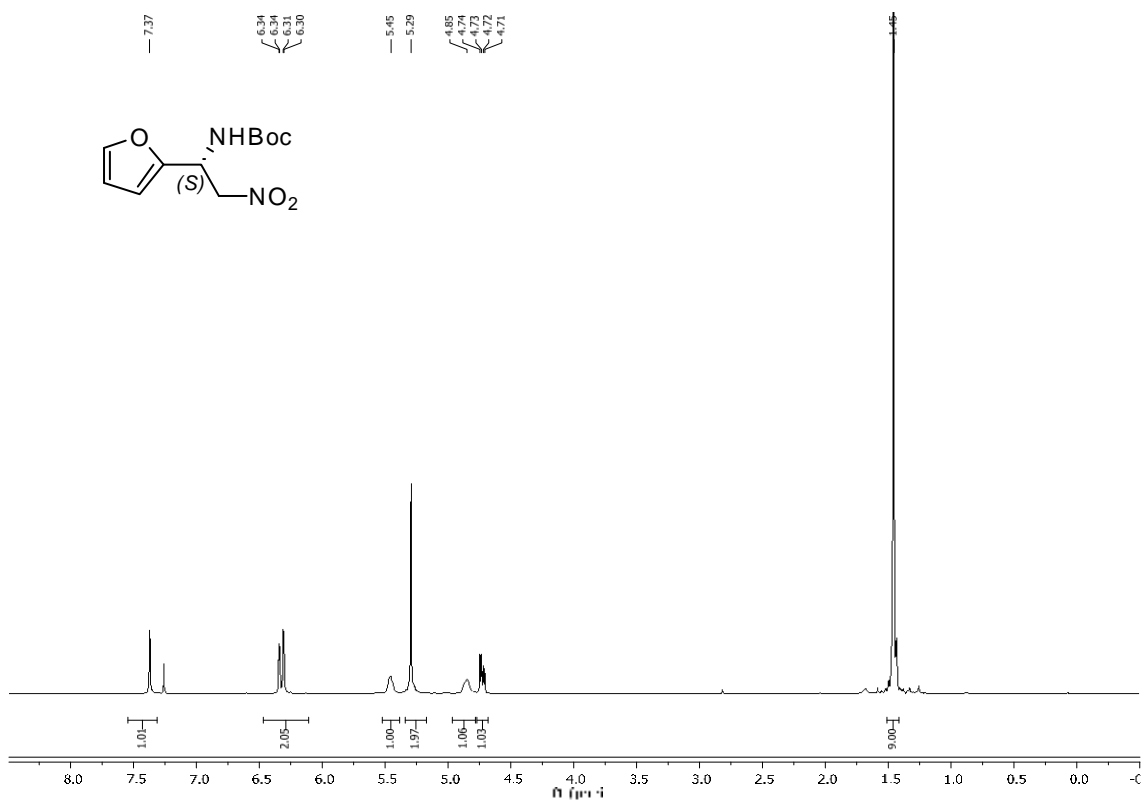

**tert-Butyldimethyl(2-nitroethoxy)silane (31c).**

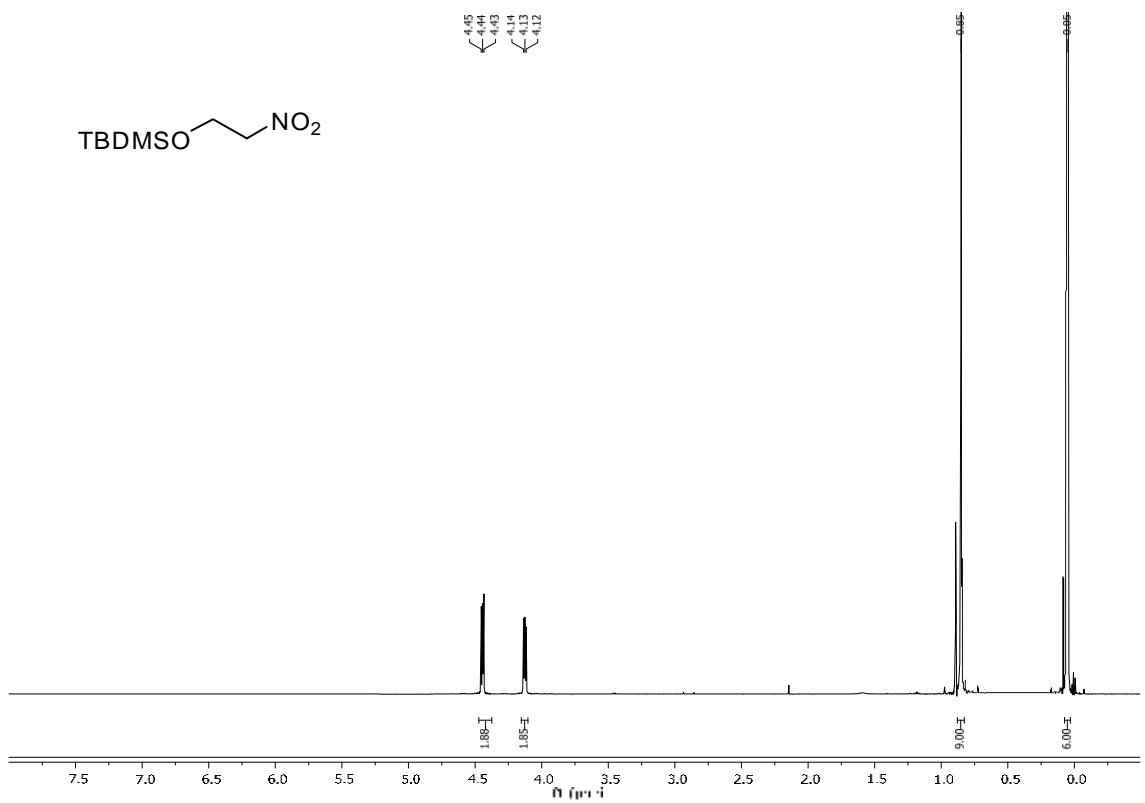



***tert*-Butyl [(1*R*, 2*S*)-2-nitro-1-phenylpropyl]carbamate (32aa).**

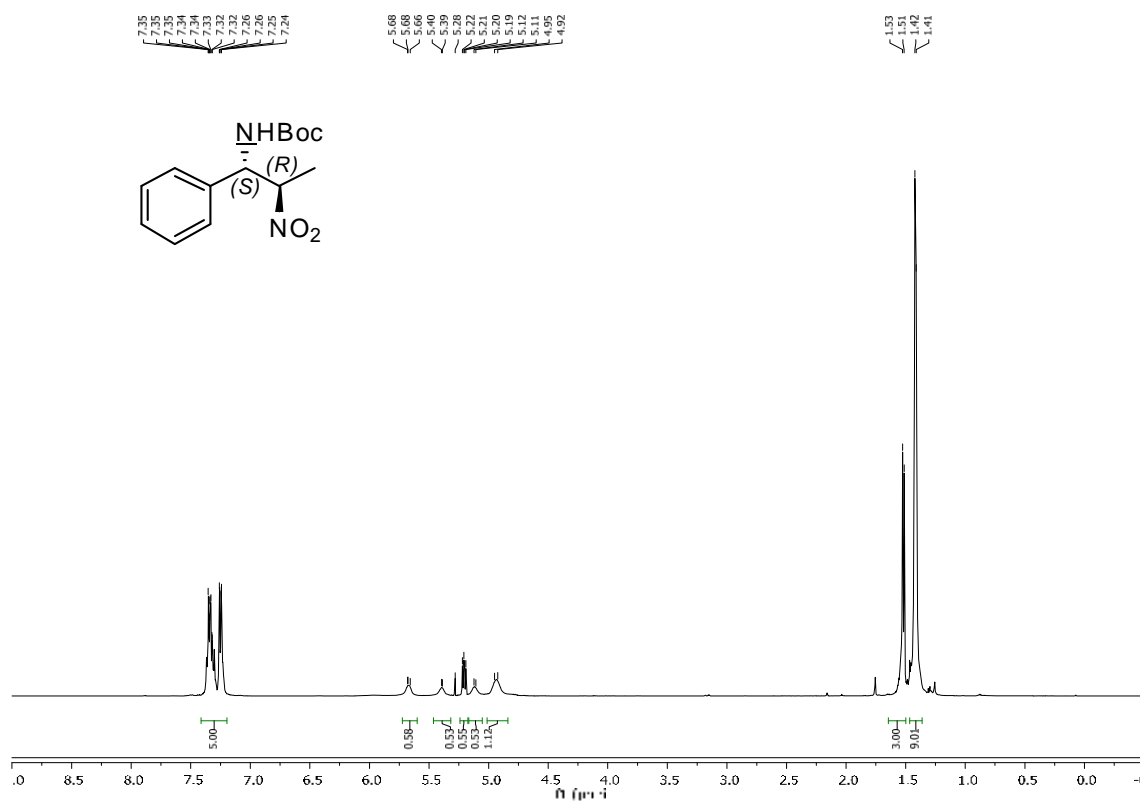

***tert*-Butyl [(1*R*, 2*S*)-2-nitro-1-phenylbutyl]carbamate (32ab).**

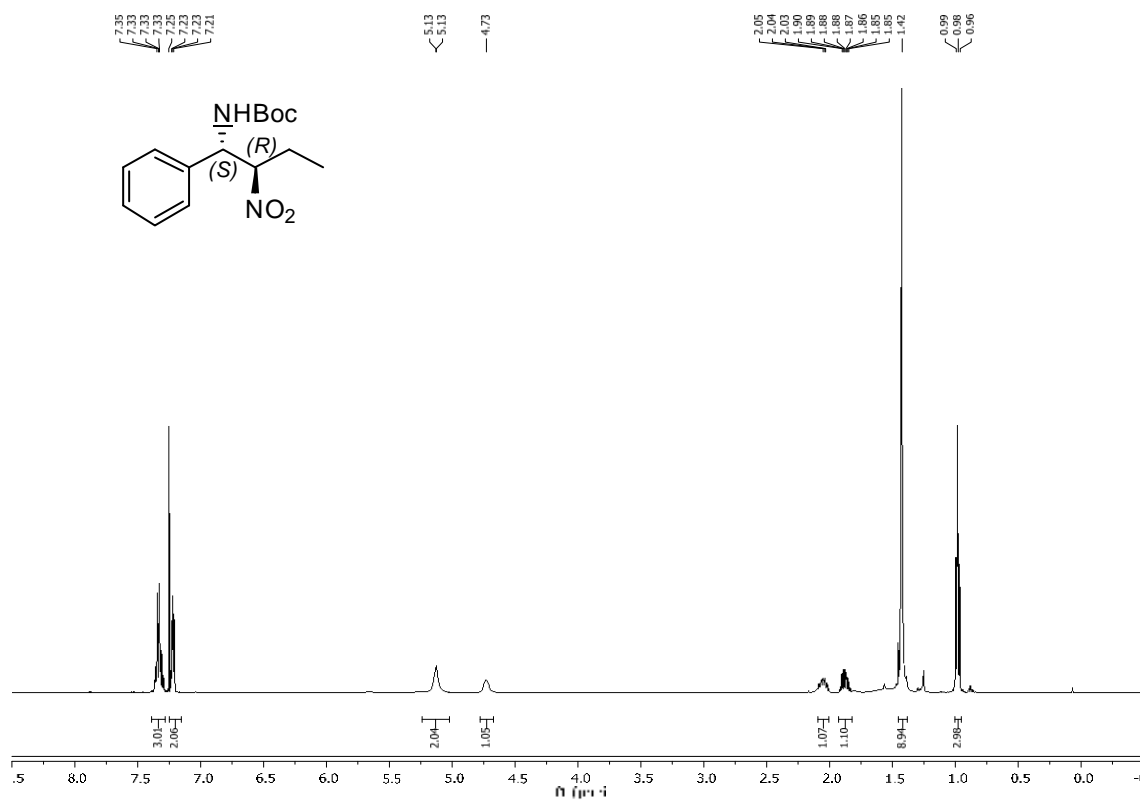

**(1*S*,2*R*)-3-(*tert*-Butyldimethylsilyloxy)-2-nitro-1-phenylpropyl carbamic acid *t*-butyl ester (32ac).**

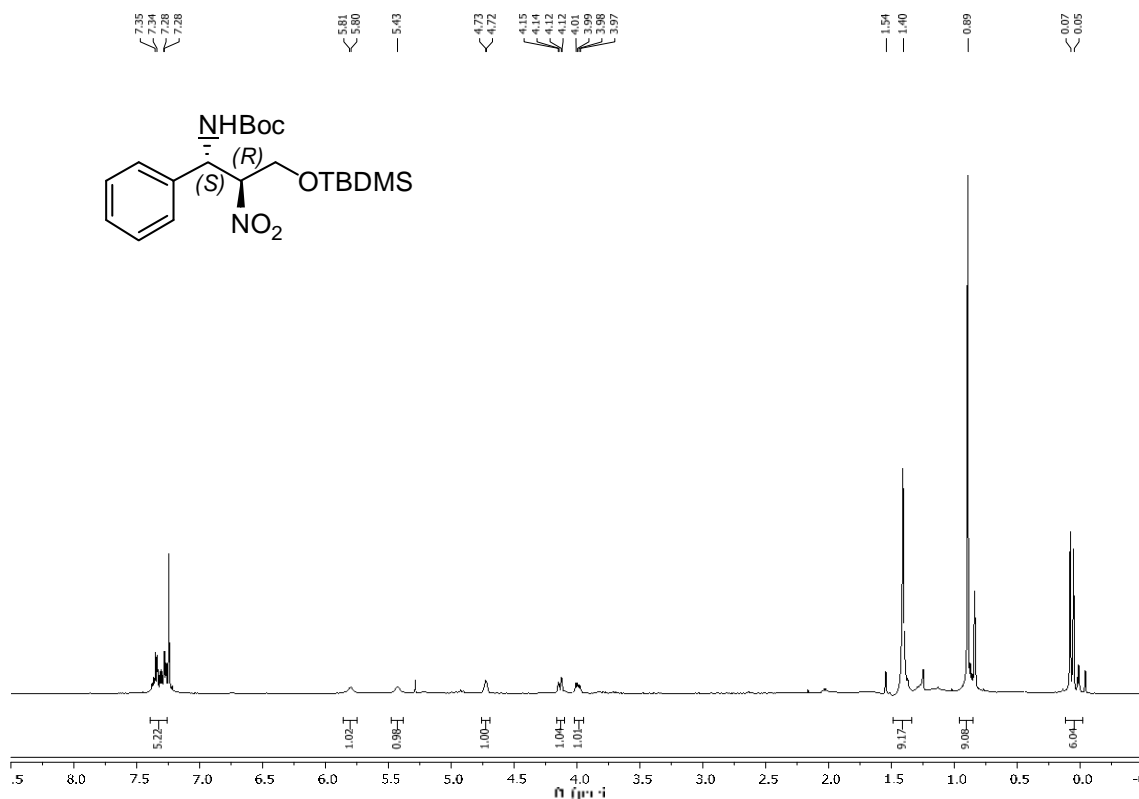

***tert*-Butyl (1*S*,2*R*)-2-nitro-1,2-diphenylethyl carbamate (32ad).**

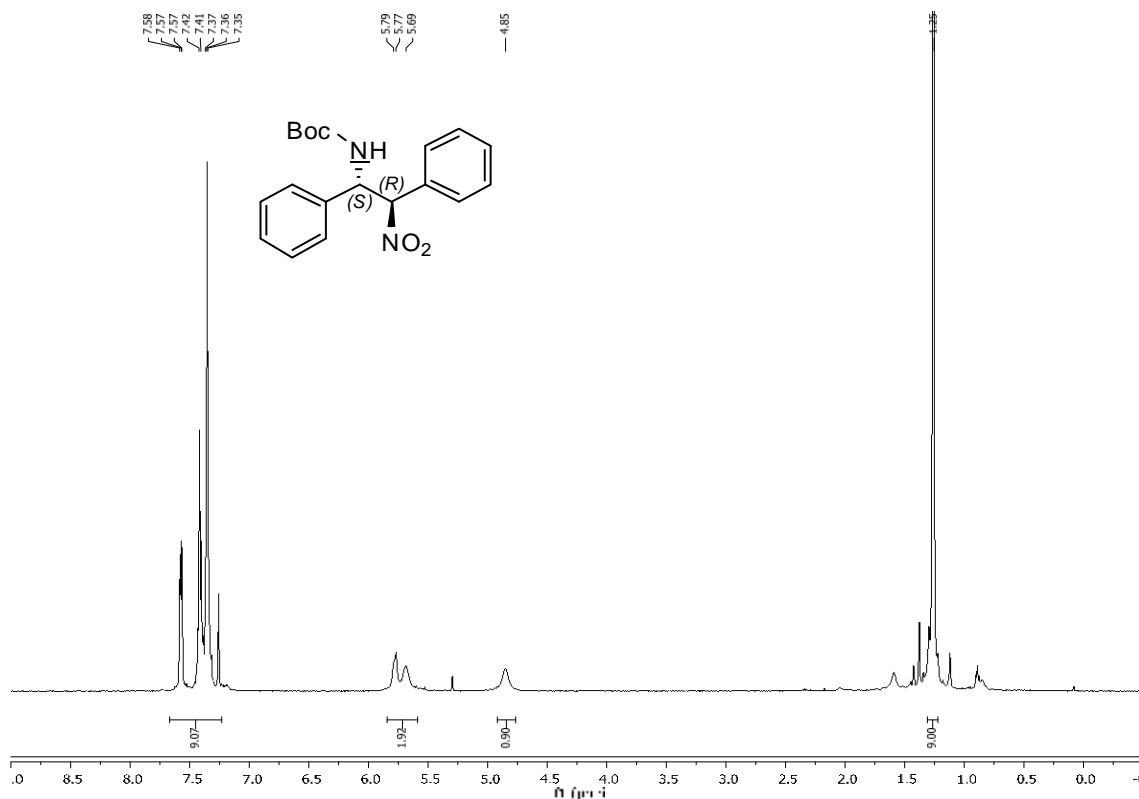

***tert*-Butyl (1*S*,2*R*)-1-(4-chlorophenyl)-2-nitro-2-phenylethylcarbamate (32cd).**

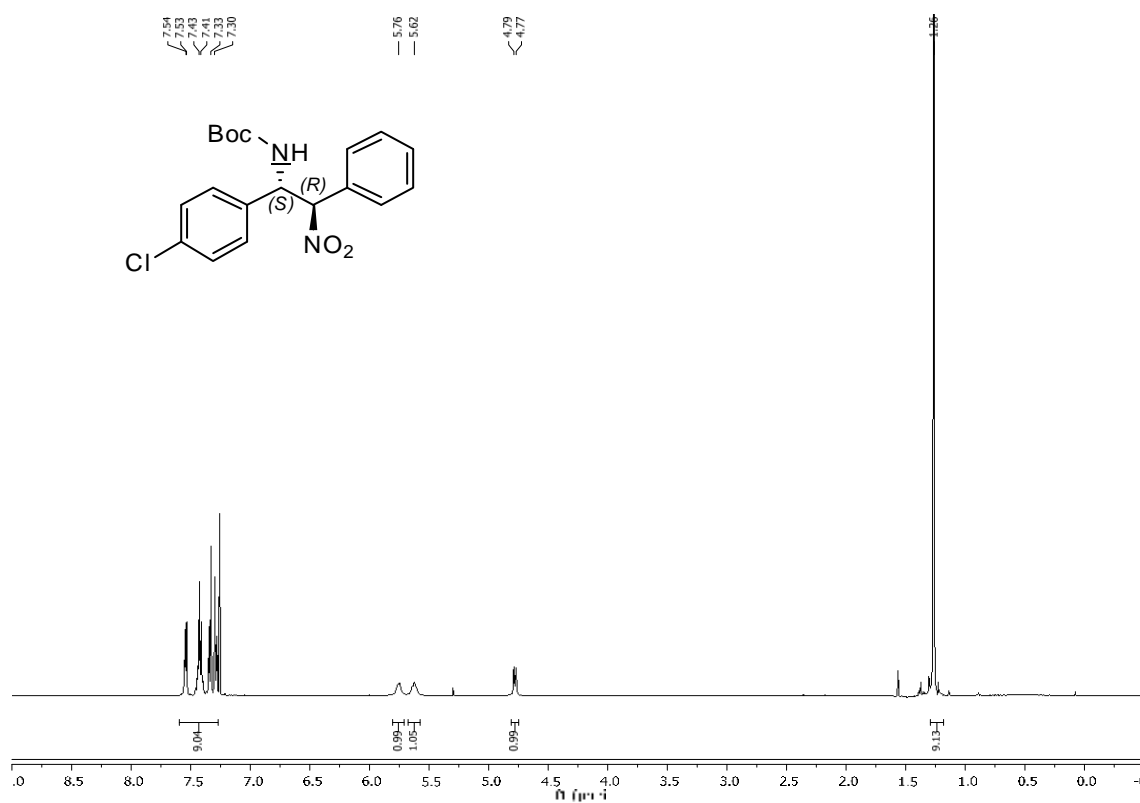

***tert*-Butyl ((2-nitroethoxy)(phenyl)methyl)carbamate (33).**

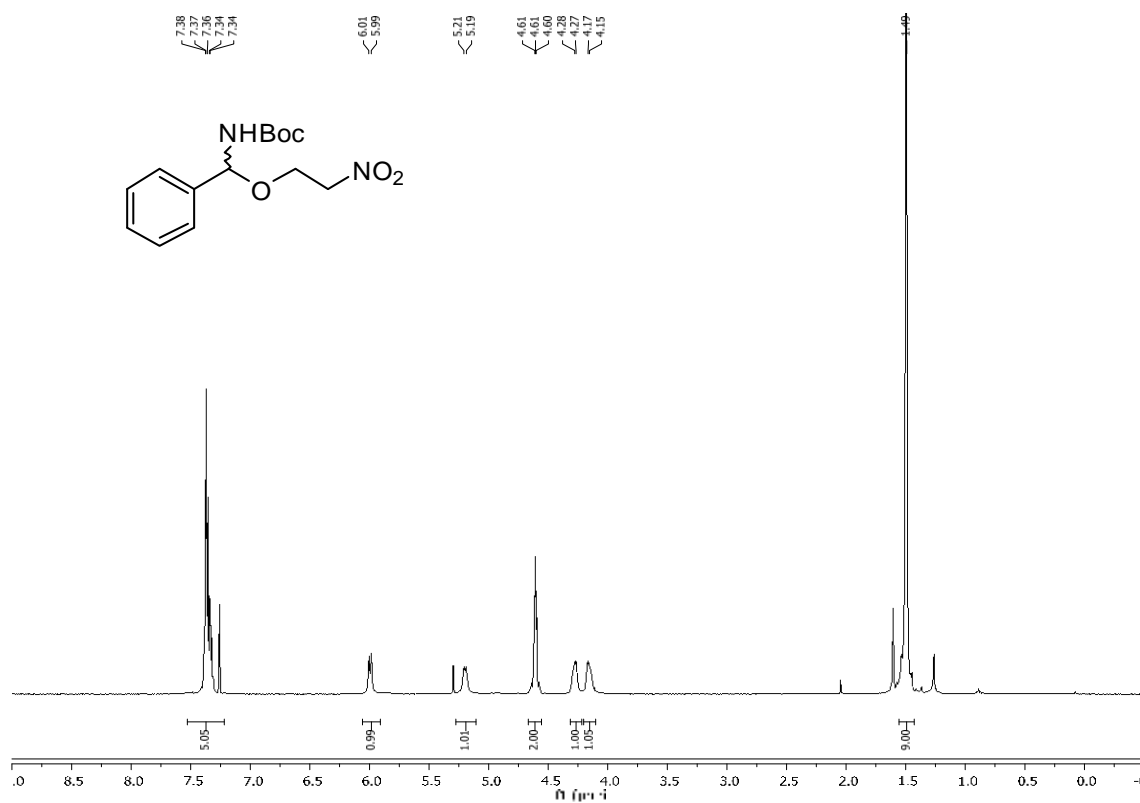

#### 4. HPLC Profiles of the Aza-Henry products.

(*S*)-*tert*-Butyl 2-nitro-1-phenylethylcarbamate (30a).

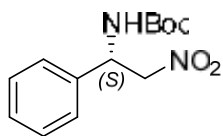

Racemic molecule:

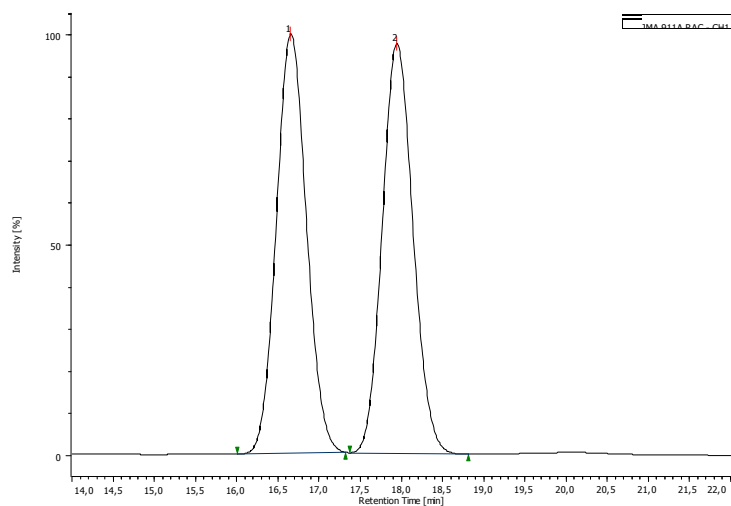

| Peak Name | tR     | Area    | Height | Area%  | Height% | Symmetry Factor |
|-----------|--------|---------|--------|--------|---------|-----------------|
| 1         | 16,650 | 2086901 | 82103  | 50,067 | 50,569  | 1,089           |
| 2         | 17,942 | 2081327 | 80256  | 49,933 | 49,431  | 1,097           |

HPLC profile for entry 2, table 2. 98:2 er.

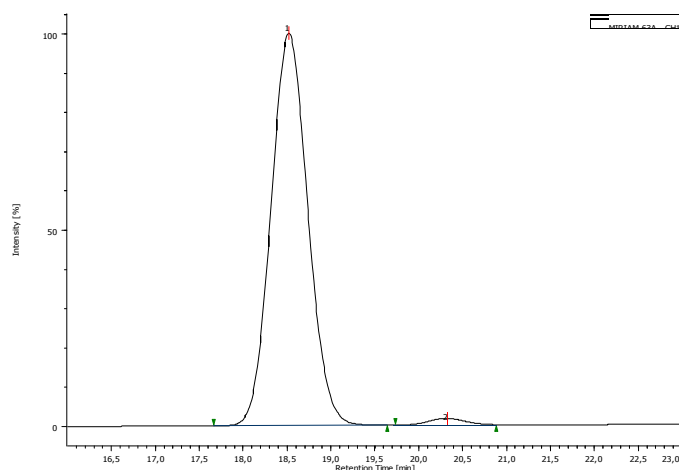

| Peak Name | tR     | Area    | Height | Area%  | Height% | Symmetry Factor |
|-----------|--------|---------|--------|--------|---------|-----------------|
| 1         | 18,517 | 7282087 | 249819 | 98,383 | 98,341  | 1,075           |
| 2         | 20,317 | 119666  | 4215   | 1,617  | 1,659   | 1,029           |

**(S)-tert-Butyl 2-nitro-1-(4-nitrophenyl)ethylcarbamate (30b).**

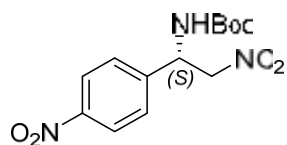

Racemic molecule:

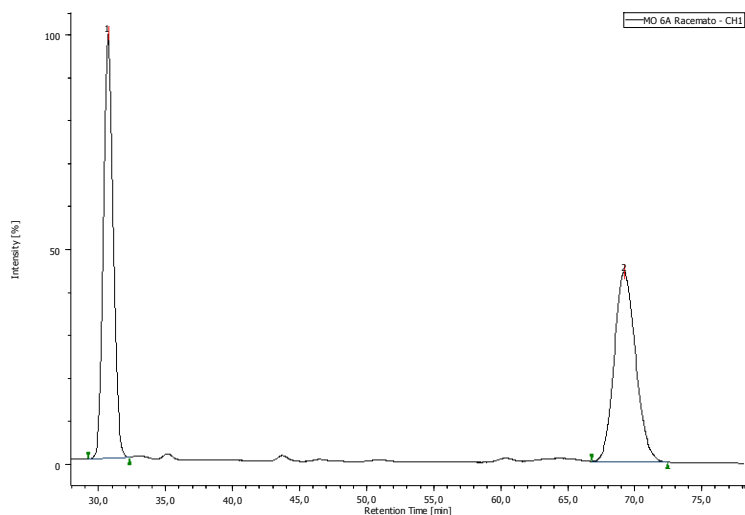

| Peak Name | tR     | Area    | Height | Area%  | Height% | Symmetry Factor |
|-----------|--------|---------|--------|--------|---------|-----------------|
| 1         | 30,742 | 1404809 | 27599  | 50,541 | 69,083  | 1,095           |
| 2         | 69,242 | 1374724 | 12351  | 49,459 | 30,917  | 1,140           |

HPLC profile for entry 4, table 2. 95:5 er.

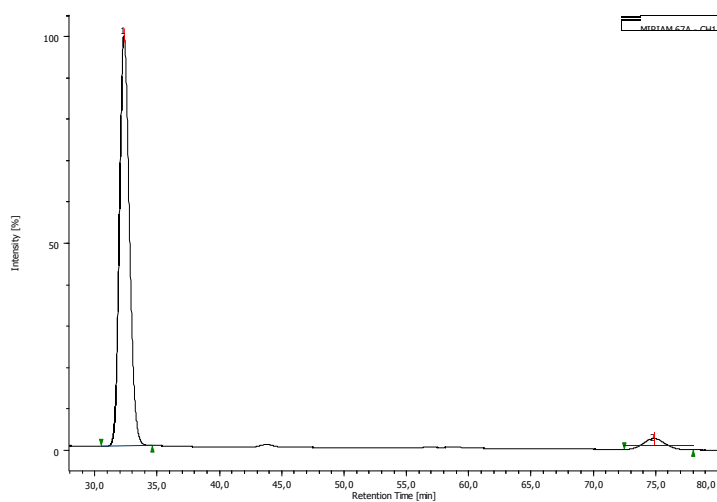

| Peak Name | tR     | Area    | Height | Area%  | Height% | Symmetry Factor |
|-----------|--------|---------|--------|--------|---------|-----------------|
| 1         | 32,350 | 3398095 | 61747  | 94,602 | 97,366  | 1,165           |
| 2         | 74,800 | 201499  | 1670   | 5,398  | 2,634   | 1,082           |

**(S)-tert-Butyl 1-(4chlorophenyl)-2-nitroethylcarbamate (30c).**

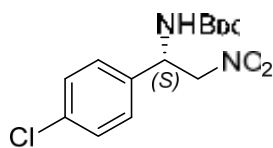

**Racemic molecule:**

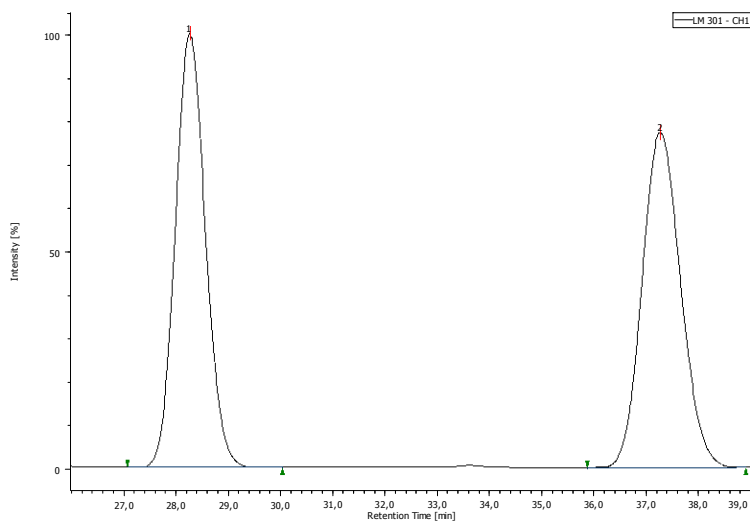

| Peak Name | tR     | Area    | Height | Area%  | Height% | Symmetry Factor |
|-----------|--------|---------|--------|--------|---------|-----------------|
| 1         | 28,267 | 3924836 | 97855  | 50,241 | 56,382  | 1,094           |
| 2         | 37,275 | 3887249 | 75702  | 49,759 | 43,618  | 1,108           |

**HPLC profile for entry 6, table 2. 96:4 er.**

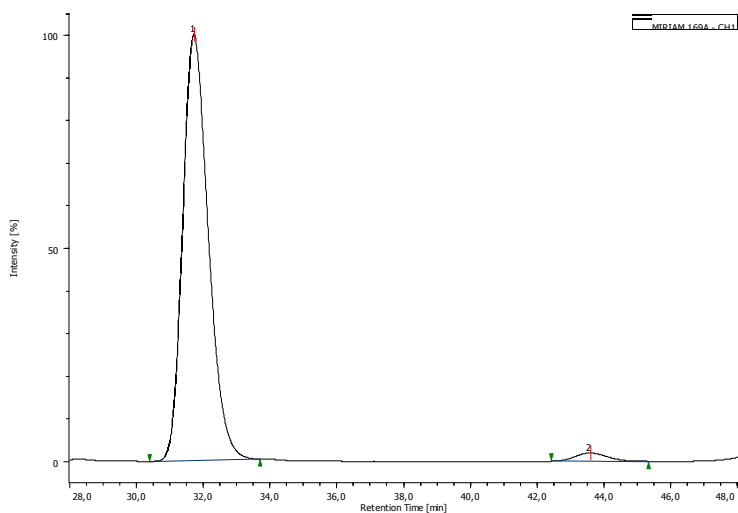

| Peak Name | tR     | Area     | Height | Area%  | Height% | Symmetry Factor |
|-----------|--------|----------|--------|--------|---------|-----------------|
| 1         | 31,717 | 14722781 | 281146 | 95,737 | 95,516  | 1,296           |
| 2         | 43,583 | 655639   | 10148  | 4,263  | 3,484   | 1,096           |

**(S)-tert-Butyl 1-(3-chlorophenyl)-2-nitroethylcarbamate (30d).**

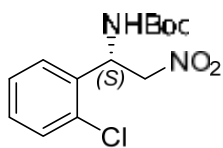

**Racemic molecule:**

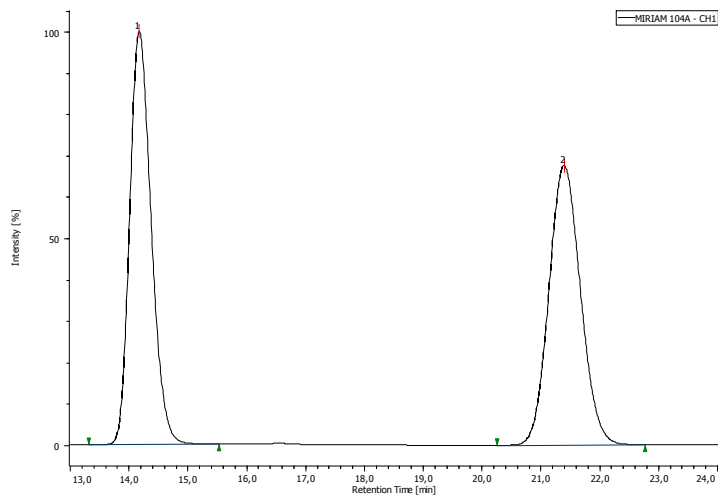

| Peak Name | tR     | Area    | Height | Area%  | Height% | Symmetry Factor |
|-----------|--------|---------|--------|--------|---------|-----------------|
| 1         | 14,167 | 9371943 | 370725 | 50,047 | 59,637  | 1,244           |
| 2         | 21,383 | 9354258 | 250907 | 49,953 | 40,363  | 1,088           |

**HPLC profile for entry 7, table 2. 94:6 er.**

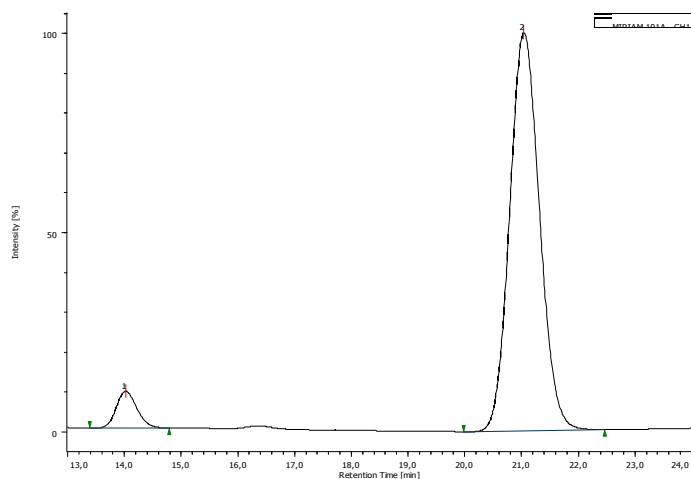

| Peak Name | tR     | Area    | Height | Area%  | Height% | Symmetry Factor |
|-----------|--------|---------|--------|--------|---------|-----------------|
| 1         | 14,025 | 416975  | 16466  | 6,039  | 8,479   | 1,150           |
| 2         | 21,033 | 6488101 | 177722 | 93,961 | 91,521  | 1,095           |

**(S)-tert-Butyl-1-(2-chlorophenyl)-2-nitroethylcarbamate (30e).**

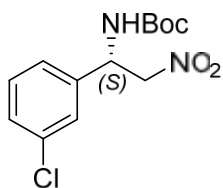

**Racemic molecule:**

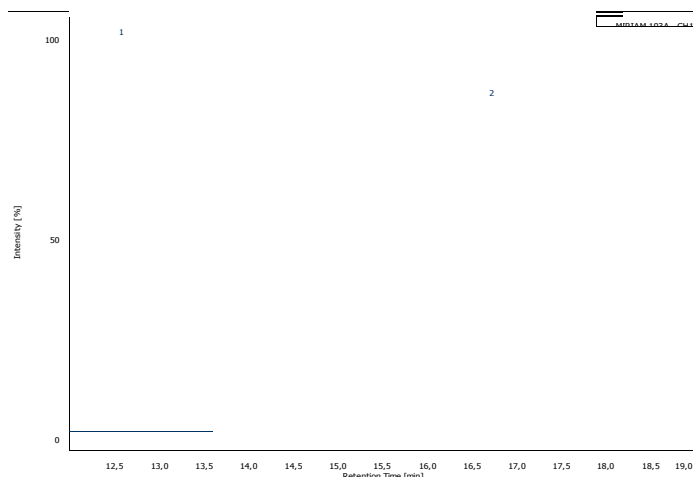

| Peak Name | tR            | Area           | Height        | Area%         | Height%       | Symmetry Factor |
|-----------|---------------|----------------|---------------|---------------|---------------|-----------------|
| <b>1</b>  | <b>12,600</b> | <b>8599989</b> | <b>349690</b> | <b>50,230</b> | <b>54,434</b> | <b>1,220</b>    |
| <b>2</b>  | <b>16,742</b> | <b>8521225</b> | <b>292725</b> | <b>49,770</b> | <b>45,566</b> | <b>1,214</b>    |

**HPLC profile for entry 8, table 2. 96:4 er.**

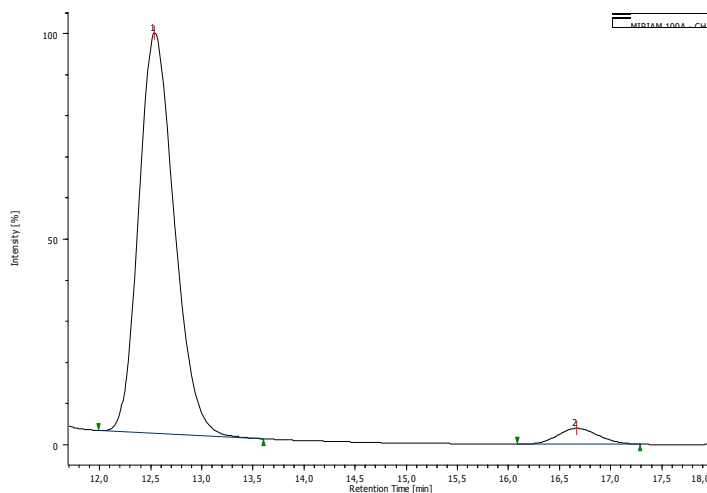

| Peak Name | tR            | Area            | Height        | Area%         | Height%       | Symmetry Factor |
|-----------|---------------|-----------------|---------------|---------------|---------------|-----------------|
| <b>1</b>  | <b>12,533</b> | <b>14501612</b> | <b>596079</b> | <b>95,645</b> | <b>96,164</b> | <b>1,223</b>    |
| <b>2</b>  | <b>16,658</b> | <b>660268</b>   | <b>23779</b>  | <b>4,355</b>  | <b>3,836</b>  | <b>1,124</b>    |



**(S)-tert-Butyl 2-nitro-1-(4-(trifluoromethyl)phenyl)ethylcarbamate (30f).**

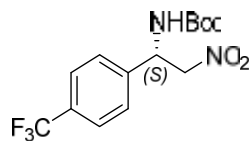

**Racemic molecule:**

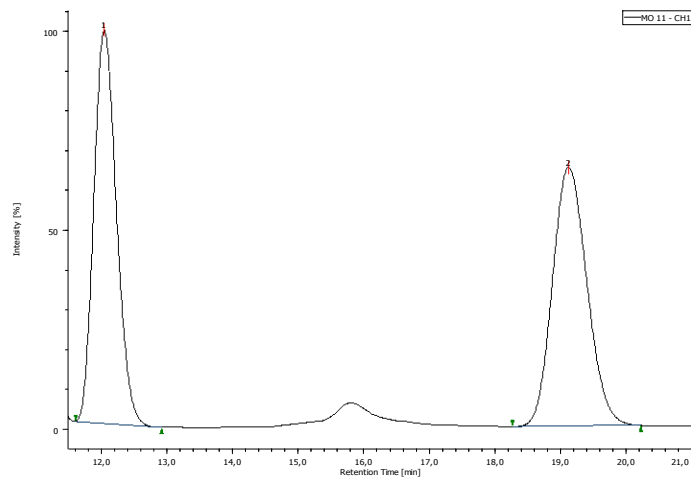

| Peak Name | tR     | Area    | Height | Area%  | Height% | Symmetry Factor |
|-----------|--------|---------|--------|--------|---------|-----------------|
| 1         | 12,050 | 1709944 | 71659  | 49,790 | 60,284  | 1,163           |
| 2         | 19,125 | 1724368 | 47209  | 50,210 | 39,716  | 1,134           |

**HPLC profile for entry 10, table 2. 97:3 er.**

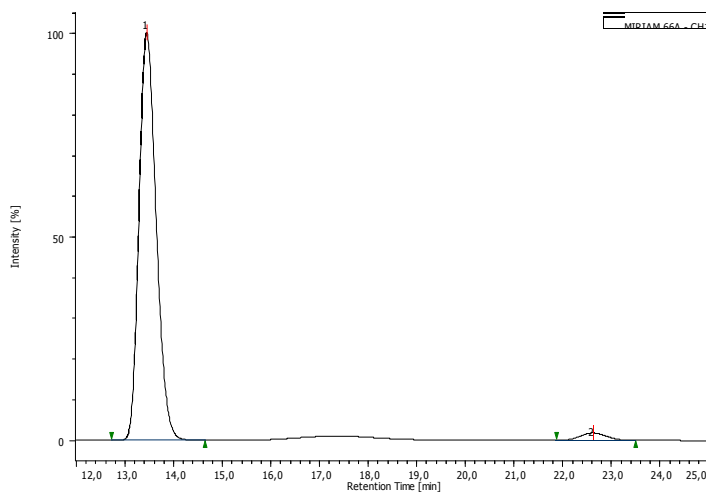

| Peak Name | tR     | Area     | Height | Area%  | Height% | Symmetry Factor |
|-----------|--------|----------|--------|--------|---------|-----------------|
| 1         | 13,442 | 10124953 | 413507 | 97,260 | 98,184  | 1,233           |
| 2         | 22,608 | 285235   | 7647   | 2,740  | 1,816   | 1,065           |

**(S)-tert-Butyl 1-(4-methoxyphenyl)-2-nitroethylcarbamate (30g).**

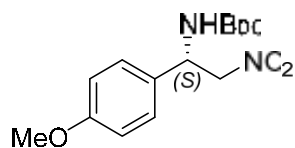

**Racemic molecule:**

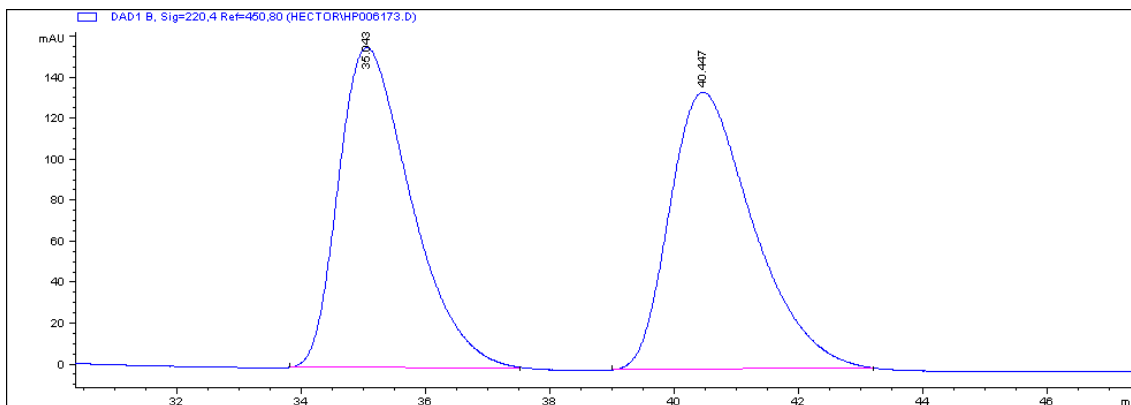

| Peak Name | Time   | Area    | Height | Area%  | Symmetry Factor |
|-----------|--------|---------|--------|--------|-----------------|
| 1         | 35.043 | 12696.5 | 156.3  | 50.029 | 0.597           |
| 2         | 40.447 | 12681.7 | 135.5  | 49.971 | 0.621           |

**HPLC profile for entry 12, table 2. 97:3 er.**

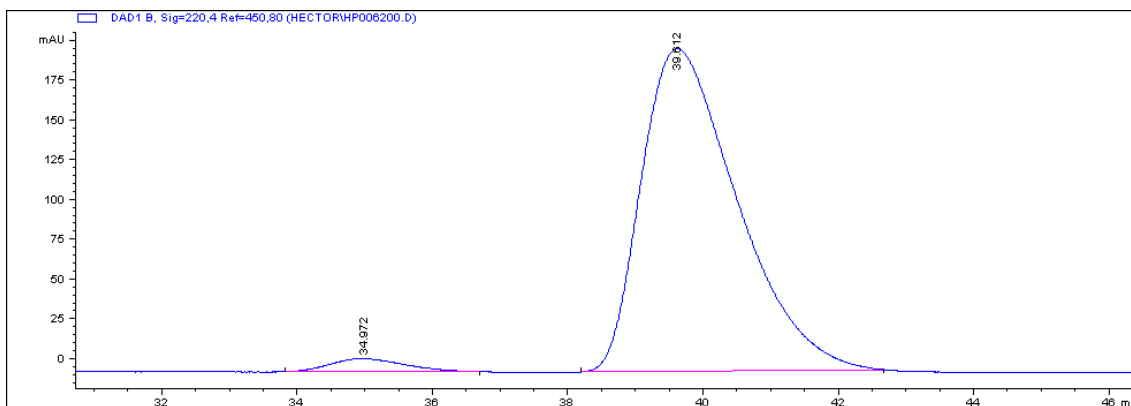

| Peak Name | Time   | Area    | Height | Area%  | Symmetry Factor |
|-----------|--------|---------|--------|--------|-----------------|
| 1         | 34.972 | 625.5   | 8.2    | 3.031  | 0.769           |
| 2         | 39.612 | 20010.6 | 202.8  | 96.969 | 0.586           |

**(S)-tert-Butyl 2-nitro-1-p-tolyethylcarbamate (30h).**

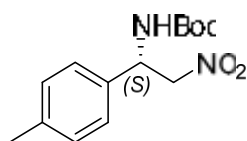

**Racemic molecule:**

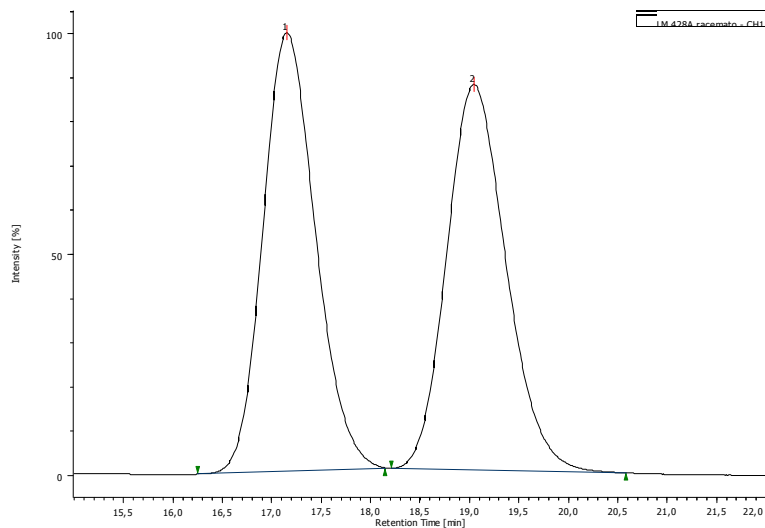

| Peak Name | tR            | Area           | Height       | Area%         | Height%       | Symmetry Factor |
|-----------|---------------|----------------|--------------|---------------|---------------|-----------------|
| <b>1</b>  | <b>17,150</b> | <b>2878873</b> | <b>78039</b> | <b>50,143</b> | <b>53,216</b> | <b>1,170</b>    |
| <b>2</b>  | <b>19,042</b> | <b>2862505</b> | <b>68608</b> | <b>49,857</b> | <b>46,784</b> | <b>1,171</b>    |

**HPLC profile for entry 14, table 2. 95:5 er.**

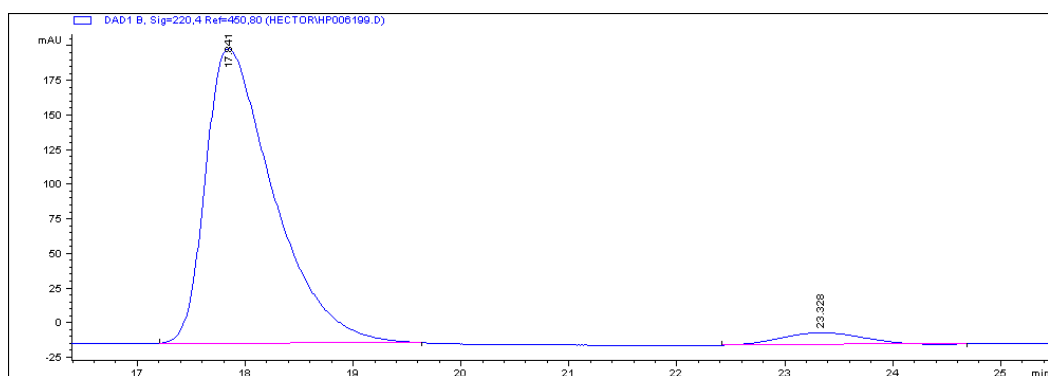

| Peak Name | Time          | Area          | Height       | Area%         | Symmetry Factor |
|-----------|---------------|---------------|--------------|---------------|-----------------|
| <b>1</b>  | <b>17.841</b> | <b>9352.9</b> | <b>213.2</b> | <b>95.474</b> | <b>0.474</b>    |
| <b>2</b>  | <b>23.328</b> | <b>443.4</b>  | <b>8.6</b>   | <b>4.526</b>  | <b>0.945</b>    |

**(S)-tert-Butyl 1-(naphthalen-2-yl)-2-nitroethylcarbamate (30i).**

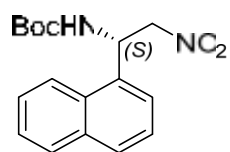

**Racemic molecule:**

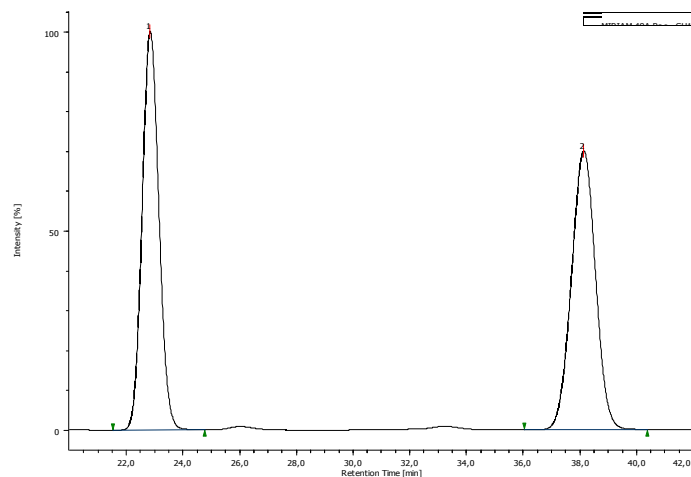

| Peak Name | tR     | Area     | Height | Area%  | Height% | Symmetry Factor |
|-----------|--------|----------|--------|--------|---------|-----------------|
| 1         | 22,842 | 20313493 | 492921 | 49,959 | 58,853  | 1,083           |
| 2         | 38,117 | 20346601 | 344621 | 50,041 | 41,147  | 0,996           |

**HPLC profile for entry 16, table 2. 94:6 er.**

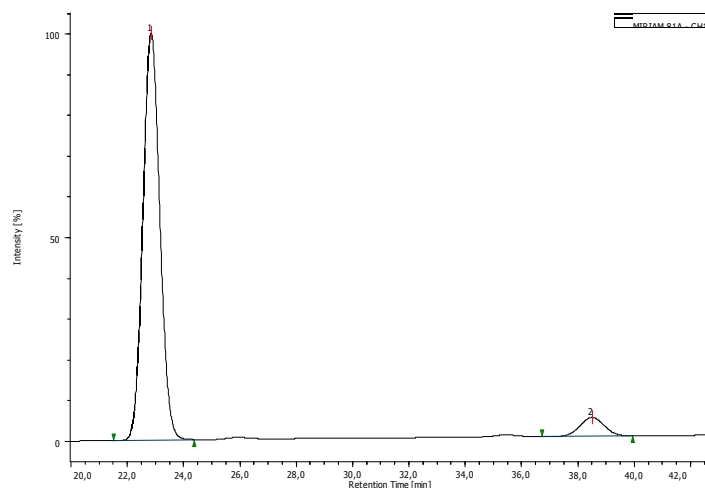

| Peak Name | tR     | Area     | Height | Area%  | Height% | Symmetry Factor |
|-----------|--------|----------|--------|--------|---------|-----------------|
| 1         | 22,842 | 12820070 | 308669 | 94,071 | 95,718  | 1,076           |
| 2         | 38,483 | 808050   | 13810  | 5,929  | 4,282   | 1,017           |

**(S)-tert-Butyl 1-(naphthalene-1-yl)-2-nitroethylcarbamate (30j).**

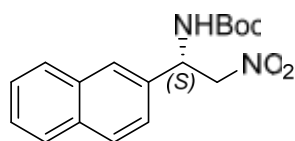

**Racemic molecule:**

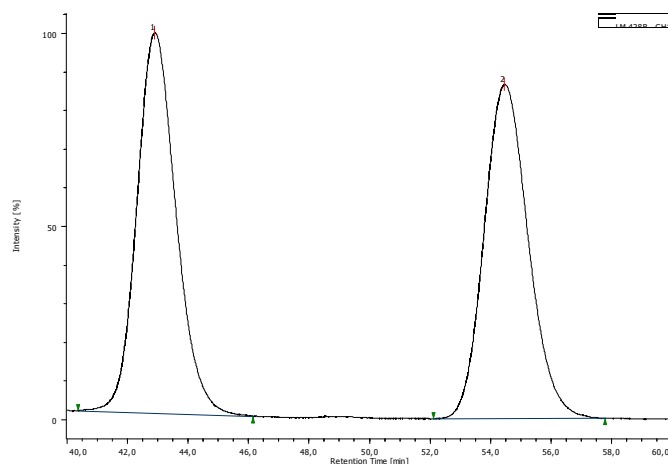

| Peak Name | tR     | Area   | Height | Area%  | Height% | Symmetry Factor |
|-----------|--------|--------|--------|--------|---------|-----------------|
| 1         | 42,892 | 474407 | 5275   | 50,282 | 53,241  | 1,157           |
| 2         | 54,442 | 469077 | 4633   | 49,718 | 46,759  | 1,148           |

**HPLC profile for entry 18, table 2. 96:4 er.**

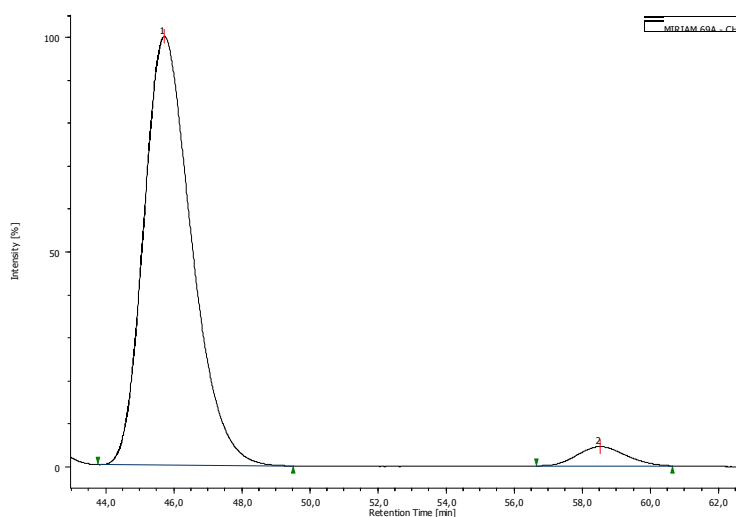

| Peak Name | tR     | Area    | Height | Area%  | Height% | Symmetry Factor |
|-----------|--------|---------|--------|--------|---------|-----------------|
| 1         | 45,725 | 3807063 | 39192  | 95,669 | 95,731  | 1,298           |
| 2         | 58,508 | 172330  | 1748   | 4,331  | 4,269   | 1,134           |

**(S)-tert-Butyl 1-(furan-2-yl)-2-nitroethylcarbamate (30k).**

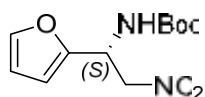

**Racemic molecule:**

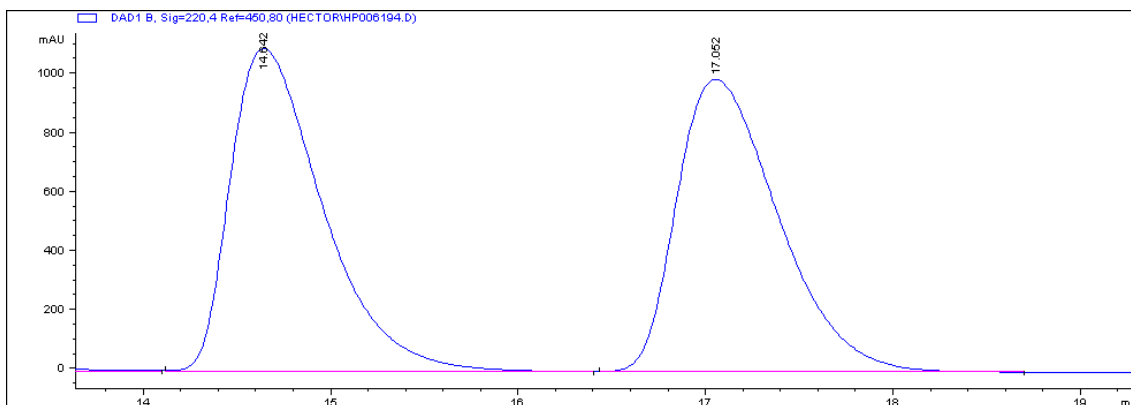

| Peak Name | Time   | Area    | Height | Area%  | Symmetry Factor |
|-----------|--------|---------|--------|--------|-----------------|
| 1         | 14.642 | 37643.9 | 1094.5 | 50.231 | 0.542           |
| 2         | 17.052 | 37297   | 991.6  | 49.769 | 0.589           |

**HPLC profile for entry 20, table 2. 91:9 er.**

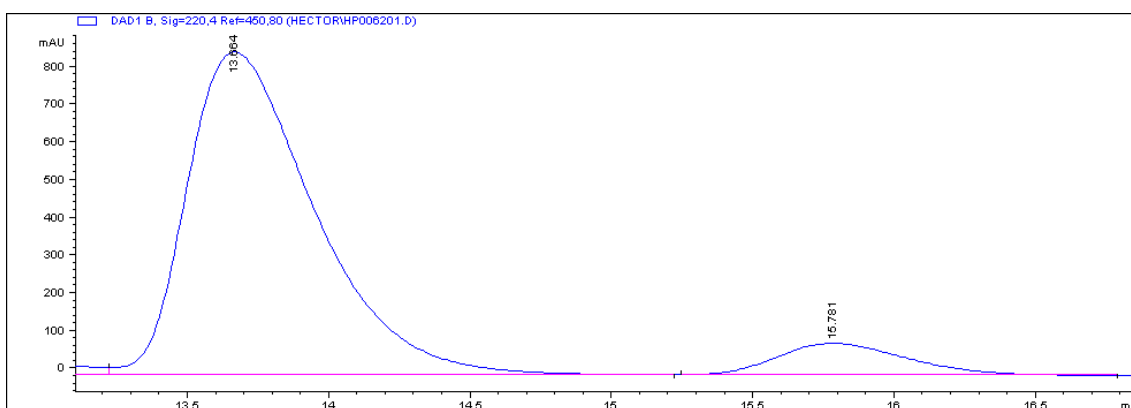

| Peak Name | Time   | Area    | Height | Area%  | Symmetry Factor |
|-----------|--------|---------|--------|--------|-----------------|
| 1         | 13.665 | 38830.8 | 1255.1 | 90.989 | 0.56            |
| 2         | 15.782 | 3845.4  | 119.3  | 9.011  | 0.736           |

**tert-Butyl [(1*R*, 2*S*)-2-nitro-1-phenylpropyl]carbamate (32aa).**

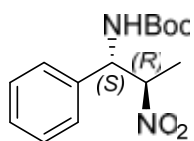

**Racemic molecule:**

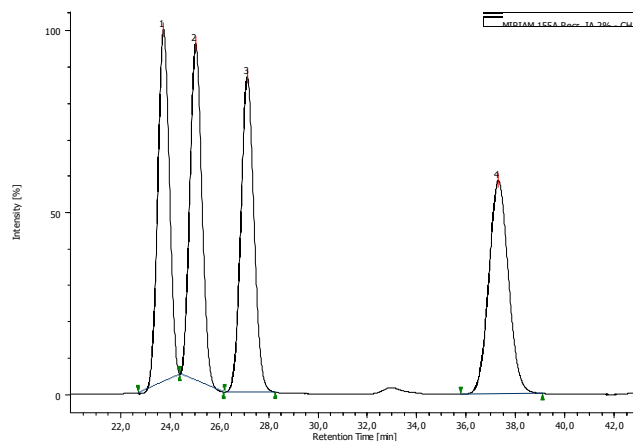

| Peak Name | tR            | Area           | Height       | Area%         | Height%       | Symmetry Factor |
|-----------|---------------|----------------|--------------|---------------|---------------|-----------------|
| <b>1</b>  | <b>23,733</b> | <b>1146401</b> | <b>35210</b> | <b>24,773</b> | <b>28,926</b> | <b>1,015</b>    |
| <b>2</b>  | <b>25,042</b> | <b>1138341</b> | <b>33651</b> | <b>24,599</b> | <b>27,645</b> | <b>1,067</b>    |
| <b>3</b>  | <b>27,125</b> | <b>1164785</b> | <b>31538</b> | <b>25,170</b> | <b>25,909</b> | <b>1,059</b>    |
| <b>4</b>  | <b>37,283</b> | <b>1178084</b> | <b>21327</b> | <b>25,458</b> | <b>17,521</b> | <b>1,070</b>    |

**HPLC profile for entry 2, table 3. 82/18 rd, 92:8 er.**

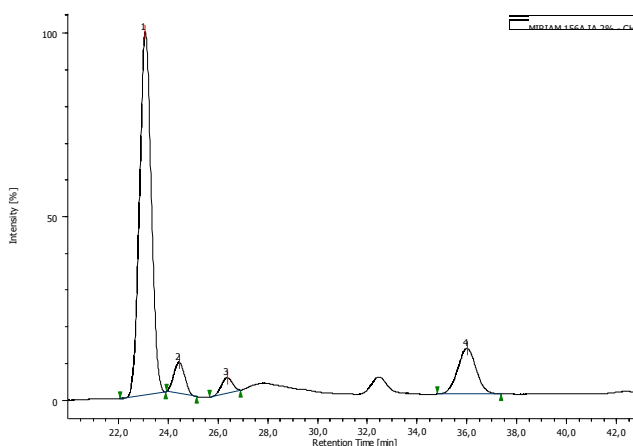

| Peak Name | tR            | Area          | Height       | Area%         | Height%       | Symmetry Factor |
|-----------|---------------|---------------|--------------|---------------|---------------|-----------------|
| <b>1</b>  | <b>23,083</b> | <b>494869</b> | <b>15149</b> | <b>75,756</b> | <b>79,726</b> | <b>1,024</b>    |
| <b>2</b>  | <b>24,433</b> | <b>40200</b>  | <b>1311</b>  | <b>6,154</b>  | <b>6,900</b>  | <b>1,062</b>    |
| <b>3</b>  | <b>26,367</b> | <b>19936</b>  | <b>640</b>   | <b>3,052</b>  | <b>3,369</b>  | <b>0,961</b>    |
| <b>4</b>  | <b>35,992</b> | <b>98236</b>  | <b>1901</b>  | <b>15,038</b> | <b>10,005</b> | <b>0,996</b>    |

***tert*-Butyl [(1*R*, 2*S*)-2-nitro-1-phenylbutyl]carbamate (32ab).**

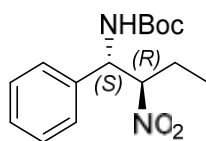

**Racemic molecule:**

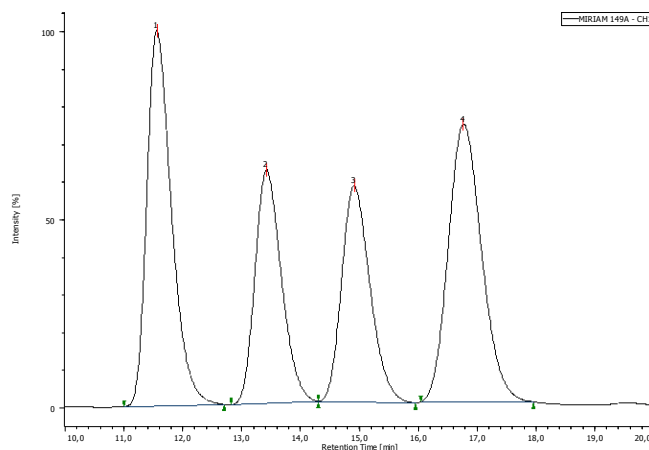

| Peak Name | tR            | Area           | Height       | Area%         | Height%       | Symmetry Factor |
|-----------|---------------|----------------|--------------|---------------|---------------|-----------------|
| <b>1</b>  | <b>11,558</b> | <b>2055003</b> | <b>70329</b> | <b>30,018</b> | <b>34,021</b> | <b>1,384</b>    |
| <b>2</b>  | <b>13,425</b> | <b>1367043</b> | <b>43744</b> | <b>19,968</b> | <b>21,160</b> | <b>1,239</b>    |
| <b>3</b>  | <b>14,917</b> | <b>1361772</b> | <b>40513</b> | <b>19,891</b> | <b>19,598</b> | <b>1,238</b>    |
| <b>4</b>  | <b>16,775</b> | <b>2062185</b> | <b>52139</b> | <b>30,122</b> | <b>25,221</b> | <b>1,175</b>    |

**HPLC profile for entry 3, table 3. 78/22 rd, 96:4 er.**

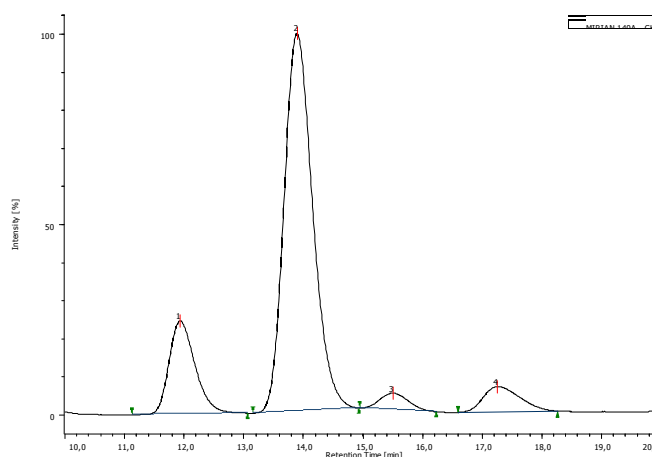

| Peak Name | tR            | Area          | Height       | Area%         | Height%       | Symmetry Factor |
|-----------|---------------|---------------|--------------|---------------|---------------|-----------------|
| <b>1</b>  | <b>11,933</b> | <b>23574</b>  | <b>739</b>   | <b>2,450</b>  | <b>3,930</b>  | <b>1,221</b>    |
| <b>2</b>  | <b>13,892</b> | <b>820886</b> | <b>15281</b> | <b>85,316</b> | <b>81,277</b> | <b>1,261</b>    |
| <b>3</b>  | <b>15,500</b> | <b>101501</b> | <b>2389</b>  | <b>10,549</b> | <b>12,709</b> | <b>1,068</b>    |
| <b>4</b>  | <b>17,250</b> | <b>16212</b>  | <b>392</b>   | <b>1,685</b>  | <b>2,085</b>  | <b>1,000</b>    |



**(1*S*,2*R*)-3-(*tert*-Butyldimethylsilyloxy)-2-nitro-1-phenylpropyl carbamic acid *t*-butyl ester (32ac).**

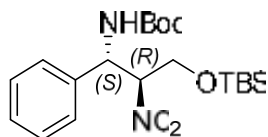

**Racemic molecule:**

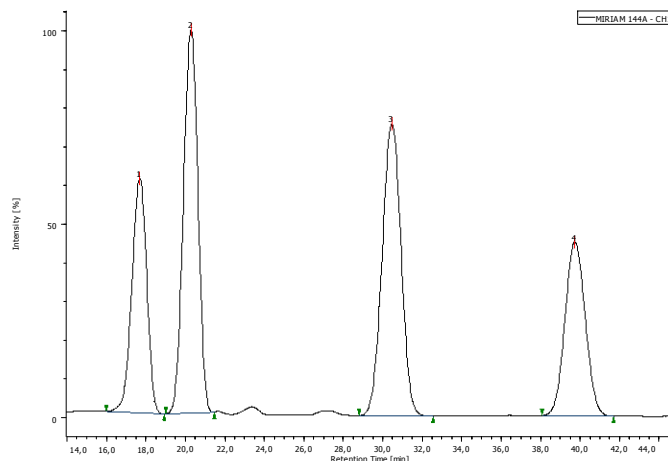

| Peak Name | tR     | Area    | Height | Area%  | Height% | Symmetry Factor |
|-----------|--------|---------|--------|--------|---------|-----------------|
| 1         | 17,717 | 757254  | 14355  | 19,387 | 21,619  | 0,921           |
| 2         | 20,308 | 1199299 | 23481  | 30,704 | 35,364  | 0,964           |
| 3         | 30,475 | 1190332 | 17905  | 30,474 | 26,965  | 0,981           |
| 4         | 39,733 | 759142  | 10659  | 19,435 | 16,053  | 1,040           |

**HPLC profile for entry 4, table 3. 56/44 rd, 88:12 er.**

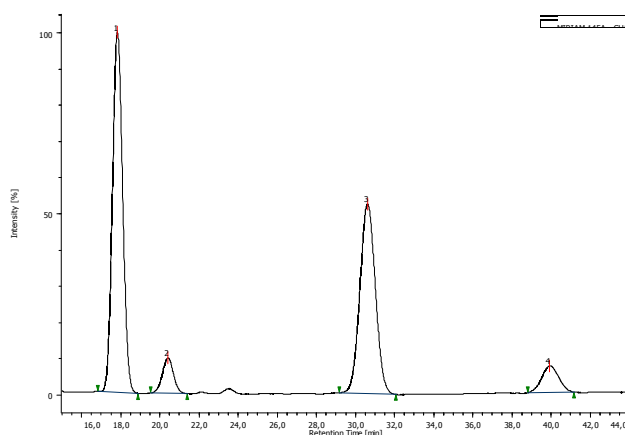

| Peak Name | tR     | Area   | Height | Area%  | Height% | Symmetry Factor |
|-----------|--------|--------|--------|--------|---------|-----------------|
| 1         | 17,825 | 654345 | 17975  | 49,395 | 58,878  | 1,065           |
| 2         | 20,400 | 70058  | 1766   | 5,289  | 5,784   | 1,019           |
| 3         | 30,600 | 520219 | 9464   | 39,270 | 30,999  | 1,030           |
| 4         | 39,908 | 80096  | 1325   | 6,046  | 4,339   | 1,037           |

**tert-Butyl ((1*S*,2*R*)-2-nitro-1,2-diphenylethyl)carbamate (32ad).**

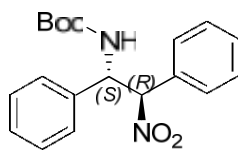

**Racemic molecule:**

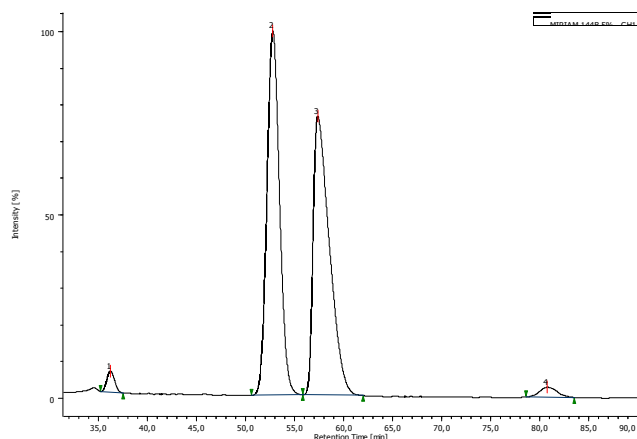

| Peak Name | tR     | Area    | Height | Area%  | Height% | Symmetry Factor |
|-----------|--------|---------|--------|--------|---------|-----------------|
| 1         | 36,250 | 316358  | 5833   | 1,686  | 3,093   | 1,108           |
| 2         | 52,800 | 9123409 | 101907 | 48,619 | 54,034  | 1,110           |
| 3         | 57,375 | 8968533 | 78068  | 47,794 | 41,394  | 1,982           |
| 4         | 80,708 | 356641  | 2790   | 1,901  | 1,479   | 1,174           |

**HPLC profile for entry 6, table 3. 91/9 rd, 71:29 er.**

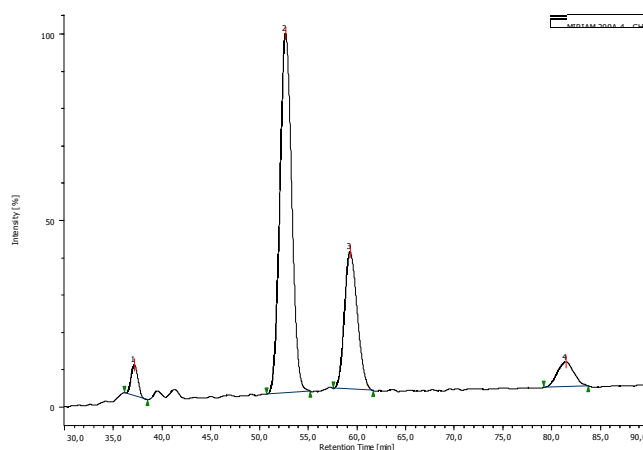

| Peak Name | tR     | Area    | Height | Area%  | Height% | Symmetry Factor |
|-----------|--------|---------|--------|--------|---------|-----------------|
| 1         | 37,150 | 175790  | 3583   | 3,207  | 5,636   | 1,082           |
| 2         | 52,667 | 3508520 | 41321  | 64,014 | 64,991  | 1,067           |
| 3         | 59,283 | 1459770 | 15828  | 26,634 | 24,895  | 1,197           |
| 4         | 81,408 | 336779  | 2847   | 6,145  | 4,478   | 1,062           |

**tert-Butyl ((1*S*,2*R*)-1-(4-chlorophenyl)-2-nitro-2-phenylethyl)carbamate (32cd).**

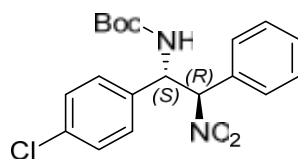

**Racemic molecule:**

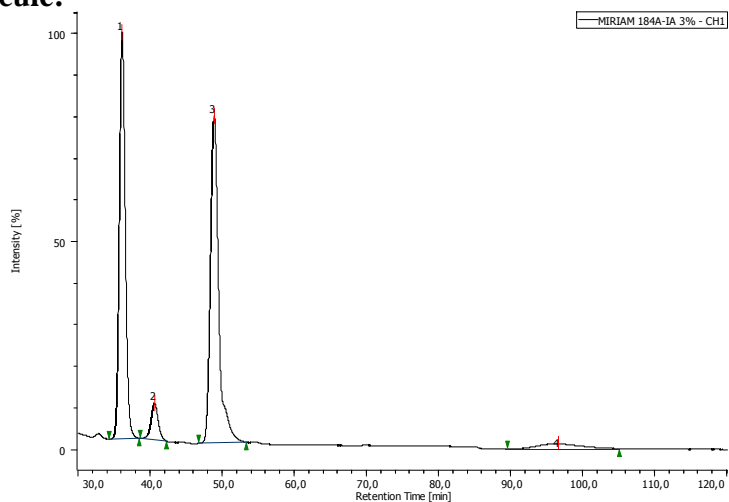

| Peak Name | tR     | Area    | Height | Area%  | Height% | Symmetry Factor |
|-----------|--------|---------|--------|--------|---------|-----------------|
| 1         | 36,133 | 3570265 | 62131  | 43,637 | 52,405  | 1,124           |
| 2         | 40,617 | 397357  | 5727   | 4,857  | 4,830   | 0,999           |
| 3         | 48,900 | 3928736 | 49989  | 48,019 | 42,165  | 1,465           |
| 4         | 96,467 | 285342  | 711    | 3,488  | 0,600   | 1,201           |

**HPLC profile for entry 7, table 3. 96/4 rd, 66:34 er.**

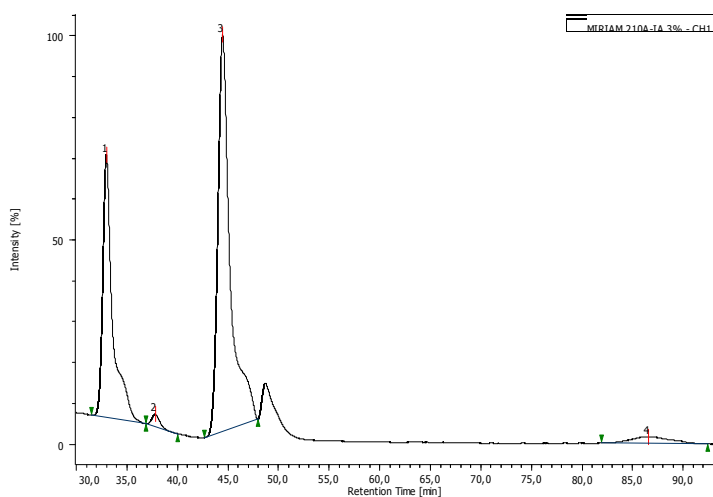

| Peak Name | tR     | Area    | Height | Area%  | Height% | Symmetry Factor |
|-----------|--------|---------|--------|--------|---------|-----------------|
| 1         | 32,983 | 990855  | 14689  | 32,669 | 38,717  | 2,025           |
| 2         | 37,808 | 37391   | 705    | 1,233  | 1,859   | 1,162           |
| 3         | 44,467 | 1906677 | 22188  | 62,864 | 58,481  | 1,912           |
| 4         | 86,500 | 98112   | 358    | 3,235  | 0,943   | 1,245           |
